# Supplementary material for: α-Fluoroamine synthesis via P(iii)-mediated deoxygenative geminal fluorosulfonimidation of 1,2-diketones
Source: Royal Society of Chemistry journal article supplement (doi:10.1039/d2ob00498d), 2022-01-01

**$\alpha$ -Fluoroamine Synthesis via P(III)-Mediated  
Deoxygenative Geminal Fluorosulfonimidation of 1,2-Diketones**

Yeri Son, Sunjoo Hwang, Sujin Bak, Ha Eun Kim, Jun-Ho Choi,\* and Won-jin Chung \*

Email: junhochoi@gist.ac.kr; wjchung@gist.ac.kr

Department of Chemistry, Gwangju Institute of Science and Technology, Gwangju 61005, Republic of Korea.

**Electronic Supplementary Information**

|                                                                                                           |            |
|-----------------------------------------------------------------------------------------------------------|------------|
| <b>1. General Experimental</b> .....                                                                      | <b>S2</b>  |
| <b>2. Experimental Procedures</b> .....                                                                   | <b>S3</b>  |
| <b>2.1. Preparation of 1,2-Diketones</b> .....                                                            | <b>S3</b>  |
| <b>2.2. Formation of Dioxaphospholenes</b> .....                                                          | <b>S6</b>  |
| <b>2.3. Geminal Fluorosulfonimidation of Aryl-Aryl 1,2-Diketones</b> .....                                | <b>S8</b>  |
| <b>2.4. Geminal Fluorosulfonimidation of Aryl-Alkyl 1,2-Diketones</b> .....                               | <b>S14</b> |
| <b>3. DFT Calculation</b> .....                                                                           | <b>S16</b> |
| <b>3.1. Geminal Fluorosulfonimidation of Diphenyl 1,2-Diketone (Benzil)</b> .....                         | <b>S16</b> |
| <b>3.2. Geminal Fluorosulfonimidation of Methyl Phenyl 1,2-Diketone (1-Phenyl-1,2-propanedione)</b> ..... | <b>S26</b> |
| <b>4. X-ray Crystallographic Data</b> .....                                                               | <b>S30</b> |
| <b>5. References</b> .....                                                                                | <b>S32</b> |
| <b>6. <sup>1</sup>H, <sup>13</sup>C, <sup>19</sup>F, and <sup>31</sup>P NMR Spectra</b> .....             | <b>S33</b> |

## 1. General Experimental

All glasswares were oven-dried (140 °C), and the round-bottom flasks used for the reactions were flame-dried. All reactions were performed under atmosphere of dry Ar or N<sub>2</sub> unless otherwise noted. Tetrahydrofuran (THF), diethyl ether (Et<sub>2</sub>O), toluene, and dichloromethane (CH<sub>2</sub>Cl<sub>2</sub>) were dried by percolation through a column packed with neutral alumina and a column packed with Q5 reactant, a supported copper catalyst for scavenging oxygen, under a positive pressure of Ar. 1,2-Dichloroethane (1,2-DCE) and  $\alpha,\alpha,\alpha$ -trifluorotoluene (PhCF<sub>3</sub>) were distilled from CaH<sub>2</sub> under Ar. Dimethyl sulfoxide (DMSO) was dried over 3 Å MS. Solvents for workup and chromatography were: ethyl acetate (EtOAc, Daejung, Extra Pure), hexanes (Duksan, Extra Pure), CH<sub>2</sub>Cl<sub>2</sub> (Daejung, Extra Pure), Et<sub>2</sub>O (Daejung, Extra pure), and *n*-pentane (Daejung, Extra Pure). Quenching solutions and drying reagents for workup were: NaCl (Daejung, Extra Pure), NH<sub>4</sub>Cl (OCI, Extra Pure), NaHCO<sub>3</sub> (OCI, Extra Pure), NaHSO<sub>3</sub> (Daejung, Extra Pure), and MgSO<sub>4</sub> (Duksan, Extra Pure). Column chromatography was performed using Merck 230–400 mesh silica gel and Acros 50–200  $\mu$ m aluminum oxide. Analytical thin-layer chromatography (TLC) was conducted on Merck silica gel or aluminum oxide 60 F<sub>254</sub> TLC plates and visualized with UV (254 nm) as well as *p*-anisaldehyde or potassium permanganate (KMnO<sub>4</sub>) staining solutions. Kugelrohr distillation was carried out using a Büchi B585 glass oven, and temperatures reported are air bath temperatures (ABT). Triethylamine was freshly distilled from CaH<sub>2</sub> under Ar. Phenylacetylene and 4-*tert*-butylphenylacetylene were distilled under Ar. 4-Iodobenzotrifluoride was distilled under reduced pressure. 1,8-Diazabicyclo[5.4.0]undec-7-ene (DBU) was distilled from CaH<sub>2</sub> under reduced pressure. The following reagents were recrystallized from the indicated solvent: 4,4'-dimethylbenzil (**1a**, hexanes), 4,4'-dimethoxybenzil (**1b**, *i*-PrOH), benzil (**1c**, EtOH), 4,4'-difluorobenzil (**1d**, EtOH), 3,3'-dimethoxybenzil (**1e**, *i*-PrOH), 2,2'-furyl (**1j**, EtOH), and 2,2'-thenil (**1k**, EtOH). The following reagents were used as received: 4-ethynylanisole (Acros, 99%), iodomethane (Aldrich, 99%), Pd(PPh<sub>3</sub>)<sub>4</sub> (Acros, 99%), CuI (Aldrich, 98%), Ru[(cymene)Cl<sub>2</sub>]<sub>2</sub> (Alfa, 98%), Oxone® (Alfa), 2,2,6,6-tetramethyl-1-piperidinyloxy (TEMPO, Alfa, 98%), acetylenedicarboxylic acid (Alfa, 97%, Aldrich, 95%), Pd(PPh<sub>3</sub>)<sub>2</sub>Cl<sub>2</sub> (TCI, >98%), 1,4-bis(diphenylphosphino)butane (dppb, TCI, >98%), *N*-fluorobenzenesulfonimide ((PhSO<sub>2</sub>)<sub>2</sub>NF, TCI, >98%, TCI, >97%), and 2-naphthaldehyde (Acros, 98%). *n*-Butyllithium (2.5 M in hexanes, Aldrich) was filtered and titrated against butylated hydroxytoluene (BHT) with fluorene as an indicator. <sup>1</sup>H, <sup>13</sup>C, <sup>19</sup>F, and <sup>31</sup>P NMR spectra were recorded on a JEOL ESC400 spectrometer (400 MHz, <sup>1</sup>H; 100 MHz, <sup>13</sup>C; 376 MHz, <sup>19</sup>F; 162 MHz, <sup>31</sup>P). Chemical shifts are referenced to residual chloroform (7.26 ppm, <sup>1</sup>H; 77.23 ppm, <sup>13</sup>C), acetonitrile (1.94 ppm, <sup>1</sup>H), acetone (206.26 ppm, <sup>13</sup>C), dichloromethane (53.50 ppm, <sup>13</sup>C), hexafluorobenzene (–164.90 ppm, <sup>19</sup>F), and triphenyl phosphate (–17.57 ppm, <sup>31</sup>P). Chemical shifts are reported in ppm. Multiplicities are indicated by s (singlet), d (doublet), t (triplet), q (quartet), and m (multiplet). Coupling constants, *J*, are reported in Hertz. HRMS (FAB and EI) was performed on a JEOL JMS-700 MStation mass spectrometer with magnetic sector-electric sector double focusing mass analyzer at Korea Basic Science Institute (KBSI), Daegu center. HRMS (ESI) was analyzed by a liquid chromatography electrospray ionization quadrupole time-of-flight mass spectroscopy (LC-ESI-QTOF-MS, Bruker impact II) in both positive and negative ESI modes at GIST Central Research Facilities (GCRF). Data are reported in the form of *m/z*. Elemental analysis was conducted on an Elementar UNICUBE at GCRF. X-ray crystallographic data for **4a** were collected using a Bruker APEX-II CCD-based diffractometer with graphite-monochromated MoK $\alpha$  radiation ( $\lambda = 0.7107$  Å) at Chonnam National University.

## 2. Experimental Procedures

### 2.1. Preparation of 1,2-Diketones

Known compounds (**1f–h**, **1l**, and **2**) were prepared according to the previously reported procedure.<sup>1</sup>

#### 1-(4-Methoxyphenyl)-2-phenylethyne (**S1i**):<sup>1</sup>

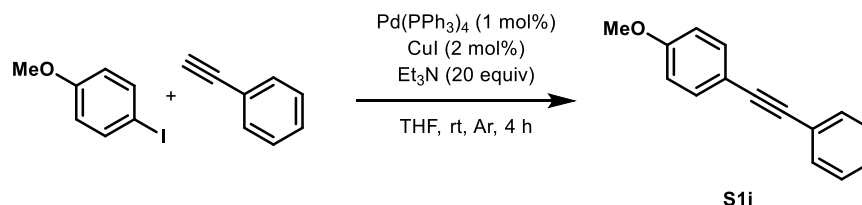

To a vigorously stirred mixture of 4-iodoanisole (1.17 g, 5.00 mmol), CuI (20 mg, 0.10 mmol), and Pd(PPh<sub>3</sub>)<sub>4</sub> (58 mg, 0.050 mmol) in THF (2.5 mL) were added phenylacetylene (580  $\mu$ L, 5.25 mmol) and Et<sub>3</sub>N (14.0 mL, 100 mmol) at rt. After 4 h, the reaction mixture was filtered through celite, rinsed with EtOAc (40 mL), and concentrated under reduced pressure. The residue was dissolved in EtOAc (40 mL), washed with sat. aq. NH<sub>4</sub>Cl (50 mL  $\times$  3), dried over MgSO<sub>4</sub> (7 g), filtered through a glass frit, and concentrated under reduced pressure. The residue was purified by column chromatography (SiO<sub>2</sub>,  $\phi$  = 4.0 cm,  $l$  = 10 cm, CH<sub>2</sub>Cl<sub>2</sub>:hexanes = 1:4, R<sub>f</sub> = 0.6, UV 254 nm) to give **S1i** (1.03 g, 99%) as pale yellow solid.

#### Data for 1-(4-methoxyphenyl)-2-phenylethyne (**S1i**):<sup>2</sup> SJB-02-006

<sup>1</sup>H NMR: (400 MHz, CDCl<sub>3</sub>)

$\delta$  7.52–7.46 (m, 4H), 7.36–7.31 (m, 3H), 6.88 (d,  $J$  = 7.3, 2H), 3.83 (s, 3H).

#### 1-(4-Methoxyphenyl)-2-phenylethane-1,2-dione (**1i**):<sup>1</sup>

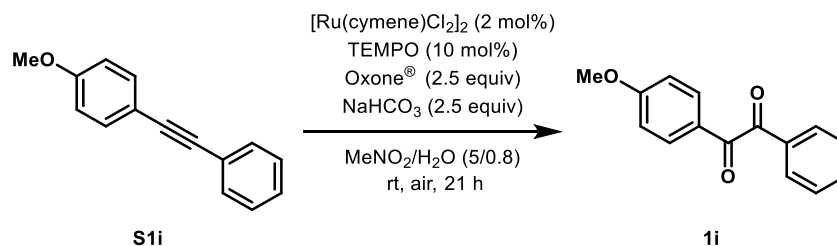

To a vigorously stirred mixture **S1i** (1.03 g, 2.90 mmol), Oxone<sup>®</sup> (7.47 g, 12.3 mmol), and NaHCO<sub>3</sub> (1.03 g, 12.3 mmol) in MeNO<sub>2</sub> (95 mL) and DI water (15 mL) were added [Ru(cymene)Cl<sub>2</sub>]<sub>2</sub> (60 mg, 0.098 mmol) and TEMPO (78 mg, 0.49 mmol) at rt under air. After 21 h, the reaction mixture was quenched by sat. aq. NaHSO<sub>3</sub> (100 mL) and extracted with EtOAc (50 mL  $\times$  3). The combined organic layers were dried over MgSO<sub>4</sub> (13 g), filtered through a glass frit, and concentrated under reduced pressure. The residue was purified by column chromatography (SiO<sub>2</sub>,  $\phi$  = 4.5 cm,  $l$  = 10 cm, CH<sub>2</sub>Cl<sub>2</sub>:hexanes = 1:2, R<sub>f</sub> = 0.3, UV 254 nm) to give **1i** (1.03 mg, 88%) as yellow solid.

#### Data for 1-(4-methoxyphenyl)-2-phenylethane-1,2-dione (**1i**):<sup>2</sup> SJB-02-008

<sup>1</sup>H NMR: (400 MHz, CDCl<sub>3</sub>)

$\delta$  7.99–7.94 (m, 4H), 7.67–7.63 (m, 1H), 7.51 (t,  $J$  = 7.8, 2H), 6.99–6.97 (m, 2H), 3.89 (s, 3H).

**1-(4-*tert*-Butylphenyl)-1-propyne (S1m):**<sup>1</sup>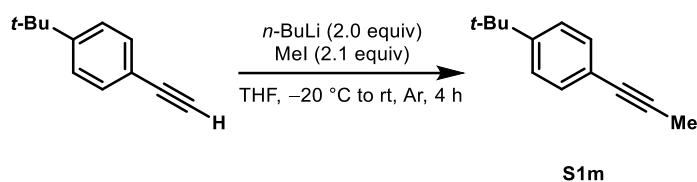

To a stirred solution of 4-*tert*-butylphenylacetylene (900  $\mu$ L, 5.00 mmol) in THF (33 mL) was added *n*-BuLi (1.34 M in hexanes, 7.5 mL, 10.0 mmol) dropwise at  $-20$   $^{\circ}$ C. After 1 h, MeI (660  $\mu$ L, 10.0 mmol) was added, and then the reaction mixture was warmed to rt. After 4 h, the reaction mixture was quenched by sat. aq.  $\text{NH}_4\text{Cl}$  (40 mL) and extracted with  $\text{Et}_2\text{O}$  (30 mL  $\times$  3). The combined organic layers were washed with brine (30 mL), dried over  $\text{MgSO}_4$  (10 g), filtered through a glass frit, and concentrated under reduced pressure. The residue was purified by column chromatography ( $\text{SiO}_2$ ,  $\phi = 4.0$  cm,  $l = 10$  cm, pentane,  $R_f = 0.5$ , UV 254 nm) to give **S1m** (845 mg, 98%) as a colorless oil.

Data for 1-(4-*tert*-butylphenyl)-1-propyne (S1m):<sup>3</sup> SJB-01-068<sup>1</sup>H NMR: (400 MHz,  $\text{CDCl}_3$ ) $\delta$  7.35–7.28 (m, 4H), 2.04 (s, 3H), 1.30 (s, 9H).**1-(4-*tert*-Butylphenyl)propane-1,2-dione (1m):**<sup>1</sup>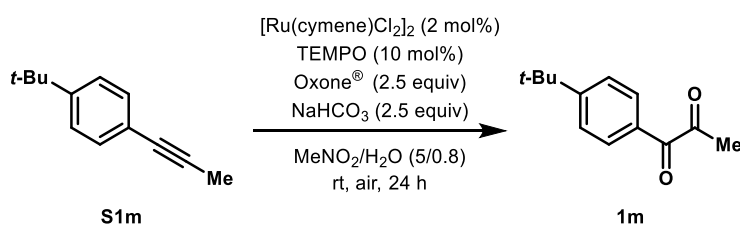

To a vigorously stirred mixture of **S1m** (845 mg, 4.90 mmol), Oxone<sup>®</sup> (7.48 g, 12.3 mmol), and  $\text{NaHCO}_3$  (1.05 g, 12.3 mmol) in  $\text{MeNO}_2$  (95 mL) and DI water (15 mL) were added  $[\text{Ru}(\text{cymene})\text{Cl}_2]_2$  (61 mg, 0.098 mmol) and TEMPO (78 mg, 0.49 mmol) at rt under air. After 24 h, the reaction mixture was quenched by sat. aq.  $\text{NaHSO}_3$  (100 mL), diluted with  $\text{CH}_2\text{Cl}_2$  (50 mL), washed with brine (50 mL  $\times$  2), dried over  $\text{MgSO}_4$  (15 g), filtered through a glass frit, and concentrated under reduced pressure. The residue was purified by column chromatography ( $\text{SiO}_2$ ,  $\phi = 4.0$  cm,  $l = 12$  cm,  $\text{CH}_2\text{Cl}_2$ :hexanes = 1:3,  $R_f = 0.2$ , UV 254 nm) to give **1m** (692 mg, 69%) as a yellow oil.

Data for 1-(4-*tert*-butylphenyl)-1-propane-1,2-dione (1m):<sup>4</sup> SJB-01-070<sup>1</sup>H NMR: (400 MHz,  $\text{CDCl}_3$ ) $\delta$  7.96–7.94 (m, 2H), 7.53–7.50 (m, 2H), 2.51 (s, 3H), 1.35 (s, 9H).

**1-Cyclopropyl-2-(4-*tert*-butyl)phenylethyne (S1n):<sup>1</sup>**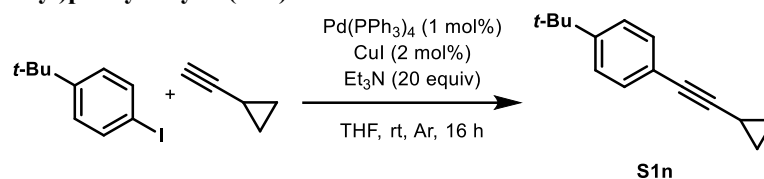

To a vigorously stirred mixture of CuI (20 mg, 0.10 mmol) and Pd(PPh<sub>3</sub>)<sub>4</sub> (58 mg, 0.050 mmol) in THF (2.5 mL) were added cyclopropylacetylene (445 μL, 5.25 mmol), 1-*tert*-butyl-4-iodobenzene (890 μL, 5.00 mmol), and Et<sub>3</sub>N (14.0 mL, 100 mmol) at rt. After 16 h, the reaction mixture was filtered through celite, rinsed with EtOAc (40 mL), and concentrated under reduced pressure. The residue was dissolved in EtOAc (40 mL), washed with sat. aq. NH<sub>4</sub>Cl (50 mL × 3), dried over MgSO<sub>4</sub> (7 g), filtered through a glass frit, and concentrated under reduced pressure. The residue was purified by column chromatography (SiO<sub>2</sub>,  $\phi$  = 4.0 cm,  $l$  = 10 cm, hexanes,  $R_f$  = 0.3, UV 254 nm) to give **S1n** (985 mg, 99%) as a pale yellow oil.

**Data for 1-cyclopropyl-2-(4-*tert*-butyl)phenylethyne (S1n):** SJB-02-011

**<sup>1</sup>H NMR:** (400 MHz, CDCl<sub>3</sub>)

$\delta$  7.40–7.33 (m, 4H), 1.53–1.49 (m, 1H), 1.36 (s, 9H), 0.93–0.81 (m, 4H).

**<sup>13</sup>C NMR:** (100 MHz, CDCl<sub>3</sub>)

$\delta$  150.6, 131.5, 125.3, 121.1, 92.7, 76.0, 34.8, 31.3, 8.7, 0.4.

**HRMS (ESI):** Calcd for C<sub>30</sub>H<sub>37</sub> [2M+H]<sup>+</sup>: 397.2896; Found: 397.2891.

**1-Cyclopropyl-2-(4-*tert*-butyl)phenylethane-1,2-dione (1n):<sup>1</sup>**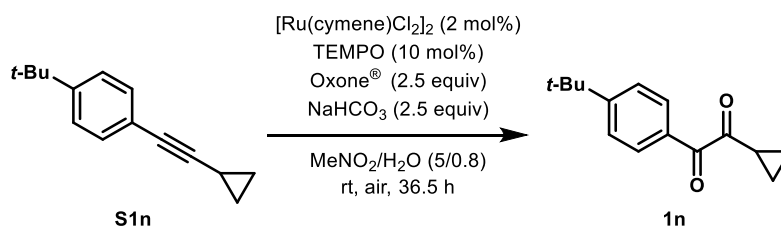

To a vigorously stirred mixture of **S1n** (835 mg, 4.20 mmol), Oxone<sup>®</sup> (6.40 g, 10.5 mmol), and NaHCO<sub>3</sub> (885 mg, 10.5 mmol) in MeNO<sub>2</sub> (90 mL) and DI water (15 mL) were added [Ru(cymene)Cl<sub>2</sub>]<sub>2</sub> (51 mg, 0.084 mmol) and TEMPO (67 mg, 0.42 mmol) at rt under air. After 36.5 h, the reaction mixture was quenched by sat. aq. NaHSO<sub>3</sub> (100 mL) and extracted with EtOAc (50 mL × 3). The combined organic layers were dried over MgSO<sub>4</sub> (15 g), filtered through a glass frit, and concentrated under reduced pressure. The residue was purified by column chromatography (SiO<sub>2</sub>,  $\phi$  = 4.5 cm,  $l$  = 10 cm, CH<sub>2</sub>Cl<sub>2</sub>:hexanes = 1:3,  $R_f$  = 0.3, UV 254 nm) to give **1n** (775 mg, 80%) as pale yellow solid.

**Data for 1-cyclopropyl-2-(4-*tert*-butyl)phenylethane-1,2-dione (1n):** SJB-02-013

**<sup>1</sup>H NMR:** (400 MHz, CDCl<sub>3</sub>)

$\delta$  7.94–7.92 (m, 2H), 7.52–7.50 (m, 2H), 2.56–2.49 (m, 1H), 1.35–1.31 (m, 11H) 1.22–1.53 (m, 2H).

**<sup>13</sup>C NMR:** (100 MHz, CDCl<sub>3</sub>)

$\delta$  203.0, 192.2, 158.6, 130.3, 129.6, 125.9, 35.4, 31.0, 18.7, 13.2.

**HRMS (ESI):** Calcd for C<sub>15</sub>H<sub>19</sub>O<sub>2</sub> [M+H]<sup>+</sup>: 231.1385; Found: 231.1380.

## 2.2 Formation of Dioxaphospholenes

Dioxaphospholene **3i**:<sup>1</sup>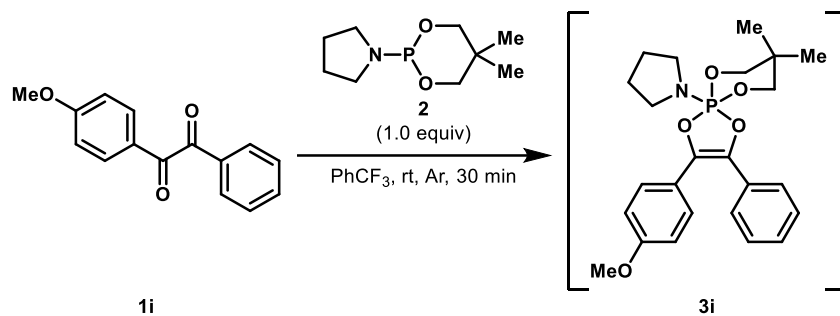

To a stirred solution of **1i** (0.50 mmol) in PhCF<sub>3</sub> (0.4 mL) was added a solution of **2** (0.50 mmol) in PhCF<sub>3</sub> (0.6 mL then rinsed with 0.3 mL) at rt. After 30 min, CDCl<sub>3</sub> (1 mL) was added, and the reaction mixture was analyzed by <sup>1</sup>H and <sup>31</sup>P NMR spectroscopy.

Data for **3i**: SJB-02-010

<sup>1</sup>H NMR: (400 MHz, CDCl<sub>3</sub>)

δ 7.64–7.17 (m, 7H), 6.85–6.82 (m, 2H), 3.90–3.85 (m, 4H), 3.81 (s, 3H), 3.51–3.48 (m, 4H),  
1.77–1.76 (m, 4H), 3.81 (s, 3H), 3.51–3.48 (m, 4H), 1.77–1.76 (m, 4H), 1.09 (s, 3H), 1.01 (s, 3H).

<sup>31</sup>P NMR: (162 MHz, CDCl<sub>3</sub>)

δ –49.3.

Dioxaphospholene **3l**:<sup>1</sup>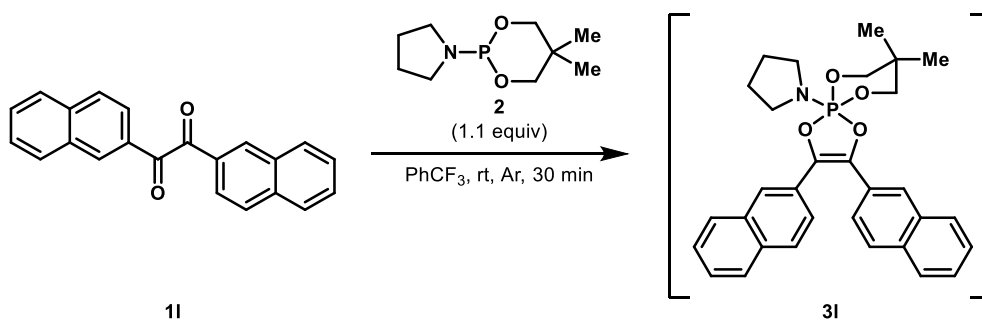

To a stirred solution of **1l** (0.30 mmol) in PhCF<sub>3</sub> (0.25 mL) was added a solution of **2** (0.33 mmol) in PhCF<sub>3</sub> (0.3 mL then rinsed with 0.2 mL) at rt. After 30 min, CDCl<sub>3</sub> (1 mL) was added, and the reaction mixture was analyzed by <sup>1</sup>H and <sup>31</sup>P NMR spectroscopy.

Data for **3l**: SJB-02-067

<sup>1</sup>H NMR: (400 MHz, CDCl<sub>3</sub>)

δ 8.27 (s, 2H), 7.89–7.49 (m, 12H), 4.16–4.03 (m, 4H), 3.71–3.60 (m, 4H), 1.88 (s, 4H),  
1.23 (s, 3H), 1.14 (s, 3H).

<sup>31</sup>P NMR: (162 MHz, CDCl<sub>3</sub>)

δ –48.9.

**Dioxaphospholenes 3k, 3m, and 3n:<sup>1</sup>**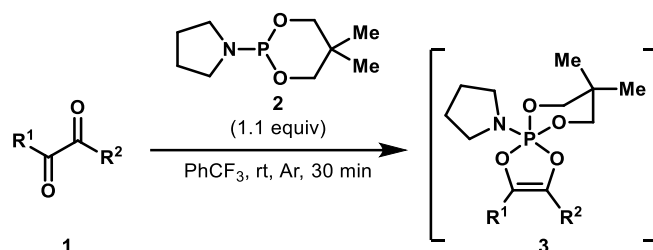

To a stirred solution of **1** (0.50 mmol) in  $\text{PhCF}_3$  (0.4 mL) was added a solution of **2** (0.55 mmol) in  $\text{PhCF}_3$  (0.6 mL then rinsed with 0.3 mL) at rt. After 30 min,  $\text{CDCl}_3$  (1 mL) was added, and the reaction mixture was analyzed by  $^1\text{H}$  and  $^{31}\text{P}$  NMR spectroscopy.

Data for **3k**: SJB-02-066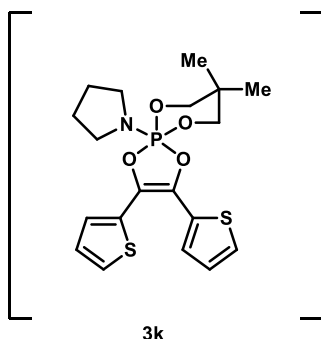

$^1\text{H}$  NMR: (400 MHz,  $\text{CDCl}_3$ )

$\delta$  7.69–7.29 (m, 4H), 7.07–7.05 (m, 2H), 3.99–3.79 (m, 4H),  
3.55–3.52 (m, 4H), 1.80–1.79 (m, 4H), 1.11 (s, 3H), 1.04 (s, 3H).

$^{31}\text{P}$  NMR: (162 MHz,  $\text{CDCl}_3$ )

$\delta$  -49.6.

Data for **3m**: SJB-02-063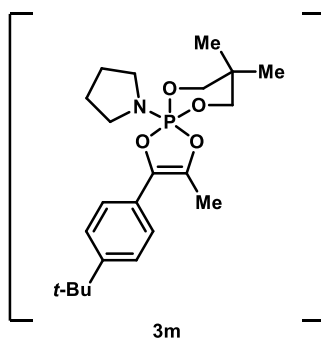

$^1\text{H}$  NMR: (400 MHz,  $\text{CDCl}_3$ )

$\delta$  7.67–7.42 (m, 4H), 4.03–3.73 (m, 4H), 3.48 (m, 4H),  
2.25 (s, 3H), 1.78–1.77 (m, 4H), 1.38 (s, 9H), 1.09 (s, 3H),  
1.03 (s, 3H).

$^{31}\text{P}$  NMR: (162 MHz,  $\text{CDCl}_3$ )

$\delta$  -48.8.

Data for **3n**: SJB-02-016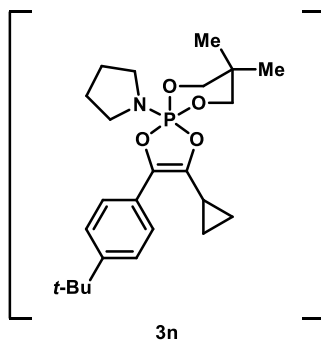

$^1\text{H}$  NMR: (400 MHz,  $\text{CDCl}_3$ )

$\delta$  7.65–7.47 (m, 2H), 7.39–7.37 (m, 2H), 3.90–3.75 (m, 4H),  
3.37 (m, 4H), 1.97–1.90 (m, 1H), 1.77–1.66 (m, 4H),  
1.34 (s, 9H), 1.02 (s, 3H), 0.99 (s, 3H), 0.89–0.82 (m, 4H).

$^{31}\text{P}$  NMR: (162 MHz,  $\text{CDCl}_3$ )

$\delta$  -49.6.

### 2.3. Geminal Fluorosulfonimidation of Aryl-Aryl 1,2-Diketones

#### General procedure for 4a–4f, 4h, 4i, 4k, and 4l:

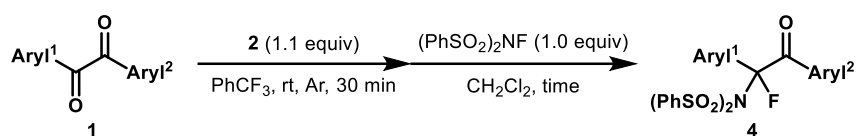

To a mixture of **1** (1.00 mmol) and **2** (224 mg, 1.10 mmol) was added PhCF<sub>3</sub> (2.5 mL) at rt. After stirring for 30 min, a solution of (PhSO<sub>2</sub>)<sub>2</sub>NF (315 mg, 1.00 mmol) in CH<sub>2</sub>Cl<sub>2</sub> (2.5 mL) was added dropwise. After the given *time*, the reaction mixture was diluted with EtOAc (50 mL) and washed with brine (50 mL × 3). The combined aqueous layers were extracted with EtOAc (100 mL). The combined organic extracts were dried over MgSO<sub>4</sub> (10 g), filtered through a glass frit, and concentrated under reduced pressure. The residue was purified by column chromatography to give **4** along with a small amount of recovered **1**.

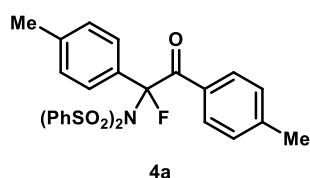

*time* = 15 min; Column chromatography (SiO<sub>2</sub>,  $\phi$  = 3.5 cm, *l* = 12 cm, EtOAc:hexanes = 1:5, R<sub>f</sub> = 0.3, UV 254 nm) afforded **4a** along with recovered **1a** (14 mg, 6%). Further purification by recrystallization (EtOH) gave **4a** (414 mg, 77%) as white crystals, which were analyzed by elemental analysis and X-ray crystallography.

Data for *N*-[1-fluoro-1,2-bis(4-methylphenyl)-2-oxoethyl]-*N*-(phenylsulfonyl)benzenesulfonimide (**4a**): YRS-03-007

<sup>1</sup>H NMR: (400 MHz, CDCl<sub>3</sub>, 40 °C)

δ 8.04–7.72 (m, 4H), 7.65 (dd, *J* = 8.4, 2.0, 2H), 7.60 (t, *J* = 7.4, 2H), 7.46 (t, *J* = 7.8, 4H), 7.10 (d, *J* = 8.4, 4H), 6.85 (d, *J* = 8.0, 2H), 2.31 (s, 3H), 2.28 (s, 3H).

<sup>13</sup>C NMR: (100 MHz, CD<sub>2</sub>Cl<sub>2</sub>, 40 °C)

δ 191.3 (d, *J* = 30.5), 144.1, 140.8, 140.5, 134.0, 131.4 (d, *J* = 2.9), 130.1 (d, *J* = 6.6), 129.2 (d, *J* = 9.5), 128.9, 128.8, 128.5, 128.3, 125.7 (d, *J* = 23.9), 106.0 (d, *J* = 231.7), 21.4, 20.9.

<sup>19</sup>F NMR: (376 MHz, CDCl<sub>3</sub>, 40 °C)

δ –115.0.

HRMS (ESI): Calcd for C<sub>28</sub>H<sub>24</sub>FNO<sub>5</sub>S<sub>2</sub>Na [M+Na]<sup>+</sup>, C<sub>28</sub>H<sub>24</sub>FNO<sub>5</sub>S<sub>2</sub>K [M+K]<sup>+</sup>: 560.0972, 576.0712;

Found: 560.0975, 576.0710.

EA: Calcd: C = 62.55, H = 4.50; Found: C = 63.05, H = 4.00.



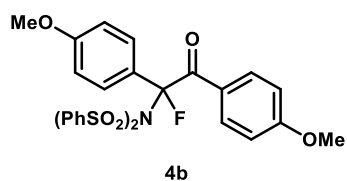

*time* = 1 h; Column chromatography (SiO<sub>2</sub>,  $\phi$  = 4 cm, *l* = 12 cm, EtOAc:hexanes = 1:2, *R<sub>f</sub>* = 0.4, UV 254 nm) afforded **4b** along with recovered **1b** (83 mg, 31%). In this case, the complete removal of residual solvents from the product was difficult. Thus, the chromatographed material was repeatedly diluted with CH<sub>2</sub>Cl<sub>2</sub> and concentrated under reduced pressure 5 times. Then, the residue was dried using a Büchi B585 glass oven (200 mTorr, 60 °C) for 13 h to give **4b** (380 mg, 67%) as beige solid.

Data for *N*-[1-fluoro-1,2-bis(4-methoxyphenyl)-2-oxoethyl]-*N*-(phenylsulfonyl)benzenesulfonimide (**4b**): SJB-01-095

<sup>1</sup>H NMR: (400 MHz, CDCl<sub>3</sub>)

$\delta$  8.00–7.81 (m, 4H), 7.79 (dd, *J* = 9.0, 1.8, 2H), 7.59 (t, *J* = 7.2, 2H), 7.49–7.47 (m, 4H), 7.21–7.07 (m, 2H), 6.79 (d, *J* = 8.8, 2H), 6.55 (m, 2H), 3.78 (s, 3H), 3.75 (s, 3H).

<sup>13</sup>C NMR: (100 MHz, CDCl<sub>3</sub>)

$\delta$  190.2 (d, *J* = 29.5), 163.3, 161.0, 140.6, 133.9, 132.6 (d, *J* = 6.7), 131.0 (d, *J* = 9.5), 128.8, 128.4, 126.6 (d, *J* = 3.8), 120.5 (d, *J* = 24.8), 113.6, 113.2, 106.2 (d, *J* = 231.7), 55.5, 55.4.

<sup>19</sup>F NMR: (376 MHz, CDCl<sub>3</sub>)

$\delta$  -113.3.

HRMS (FAB): Calcd for C<sub>28</sub>H<sub>24</sub>FNO<sub>7</sub>S<sub>2</sub>H [M+H]<sup>+</sup>: 570.1056; Found: 570.1051

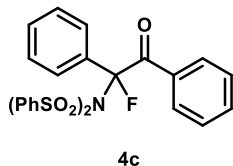

*time* = 12 h; Column chromatography (SiO<sub>2</sub>,  $\phi$  = 3.5 cm, *l* = 12 cm, EtOAc:hexanes = 1:5 → 1:2, *R<sub>f</sub>* = 0.2 in EtOAc:hexanes = 1:5, UV 254 nm) afforded **4c** along with recovered **1c** (58 mg, 28%). Further purification by recrystallization (EtOH) gave **4c** (330 mg, 61%) as white crystals.

Data for *N*-(1-fluoro-1,2-diphenyl-2-oxoethyl)-*N*-(phenylsulfonyl)benzenesulfonimide (**4c**): YRS-03-054

<sup>1</sup>H NMR: (400 MHz, CDCl<sub>3</sub>)

$\delta$  8.00–7.80 (m, 4H), 7.72–7.70 (m, 2H), 7.60 (t, *J* = 7.4, 2H) 7.49–7.41 (m, 5H), 7.32–7.24 (m, 5H), 7.09–7.06 (m, 2H).

<sup>13</sup>C NMR: (100 MHz, CDCl<sub>3</sub>)

$\delta$  192.5 (d, *J* = 30.5), 140.9, 134.7, 134.0, 132.8, 130.3, 130.2 (d, *J* = 5.7), 129.7 (d, *J* = 9.5), 129.3 (d, *J* = 23.8), 128.9, 128.7, 128.3, 128.0, 105.9 (d, *J* = 232.6).

<sup>19</sup>F NMR: (376 MHz, CDCl<sub>3</sub>)

$\delta$  -115.7.

HRMS (ESI): Calcd for C<sub>26</sub>H<sub>20</sub>FNO<sub>5</sub>S<sub>2</sub>Na [M+Na]<sup>+</sup>: 532.0665; Found: 532.0656.

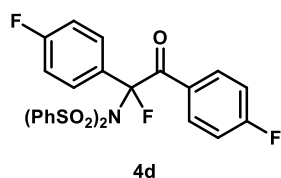

*time* = 1 h; Column chromatography (SiO<sub>2</sub>,  $\phi$  = 3.5 cm, *l* = 12 cm, EtOAc:hexanes = 1:5 → 1:2, *R<sub>f</sub>* = 0.3 in EtOAc:hexanes = 1:5, UV 254 nm) afforded **4d** along with recovered **1d** (21 mg, 9%). Further purification by recrystallization (EtOH) gave **4d** (429 mg, 79%) as white crystals, which were analyzed by elemental analysis.

Data for *N*-[1-fluoro-1,2-bis(4-fluorophenyl)-2-oxoethyl]-*N*-(phenylsulfonyl)benzenesulfonimide (**4d**): YRS-03-051

<sup>1</sup>H NMR: (400 MHz, CDCl<sub>3</sub>)

$\delta$  8.20–7.84 (m, 4H), 7.81–7.77 (m, 2H), 7.63–7.62 (m, 2H), 7.52–7.50 (m, 4H), 7.27–7.25 (m, 2H), 7.00 (td, *J* = 8.7, 2.3, 2H), 6.77 (t, *J* = 7.6, 2H).

<sup>13</sup>C NMR: (100 MHz, CDCl<sub>3</sub>)

$\delta$  190.9 (d, *J* = 30.5), 165.7 (d, *J* = 254.5), 164.0 (d, *J* = 251.7), 140.7, 134.2, 133.0 (dd, *J* = 9.3, 6.9), 131.9 (dd, *J* = 9.3, 6.7), 130.6 (dd, *J* = 3.6), 129.0, 128.7, 124.9 (dd, *J* = 24.8, 3.3), 115.6 (dd, *J* = 21.8, 1.1), 115.1 (dd, *J* = 21.9, 1.9), 105.6 (d, *J* = 232.2).

<sup>19</sup>F NMR: (376 MHz, CDCl<sub>3</sub>)

$\delta$  -107.8, -112.6, -114.4.

HRMS (ESI): Calcd for C<sub>26</sub>H<sub>18</sub>F<sub>3</sub>NO<sub>5</sub>S<sub>2</sub>Na [M+Na]<sup>+</sup>, C<sub>26</sub>H<sub>18</sub>F<sub>3</sub>NO<sub>5</sub>S<sub>2</sub>K [M+K]<sup>+</sup>: 568.0476, 584.0216;

Found: 568.0469, 584.0206.

EA: Calcd: C = 57.24, H = 3.33; Found: C = 57.31, H = 3.39.

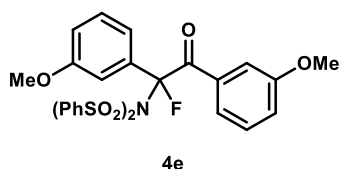

*time* = 12 h; Column chromatography (SiO<sub>2</sub>,  $\phi$  = 4.0 cm, *l* = 12 cm, EtOAc:hexanes = 1:2, *R<sub>f</sub>* = 0.4, UV 254 nm) afforded **4e** along with recovered **1e** (114 mg, 42%). In this case, the complete removal of residual solvents from the product was difficult. Thus, the chromatographed material was repeatedly diluted with CH<sub>2</sub>Cl<sub>2</sub> and concentrated under reduced pressure 5 times. Then, the residue was dried using a Büchi B585 glass oven (200 mTorr, 60 °C) for 12 h to give **4b** (285 mg, 50%) as off-white solid.

Data for *N*-[1-fluoro-1,2-bis(3-methoxyphenyl)-2-oxoethyl]-*N*-(phenylsulfonyl)benzenesulfonimide (**4e**): SJB-01-086

<sup>1</sup>H NMR: (400 MHz, CDCl<sub>3</sub>)

$\delta$  8.20–7.70 (m, 4H), 7.60 (t, *J* = 7.2, 2H), 7.49–7.47 (m, 4H), 7.32–7.29 (m, 2H), 7.22–7.18 (m, 1H), 7.04–6.98 (m, 3H), 6.81 (dd, *J* = 8.2, 2.6, 1H), 6.75–6.60 (m, 1H), 3.74 (s, 3H), 3.57 (s, 3H).

<sup>13</sup>C NMR: (100 MHz, CDCl<sub>3</sub>)

$\delta$  192.0 (d, *J* = 31.4), 159.3, 158.9, 140.6, 135.5 (d, *J* = 3.8), 134.0, 130.3 (d, *J* = 24.3), 129.2, 129.0, 128.9, 128.5, 122.6 (d, *J* = 6.7), 122.0 (d, *J* = 9.5), 119.4, 116.6, 114.9 (d, *J* = 4.8), 114.7 (d, *J* = 9.5), 105.6 (d, *J* = 233.6), 55.4, 55.2.

<sup>19</sup>F NMR: (376 MHz, CDCl<sub>3</sub>)

$\delta$  -114.6.

HRMS (ESI): Calcd for C<sub>28</sub>H<sub>24</sub>FNO<sub>7</sub>S<sub>2</sub>Na [M+Na]<sup>+</sup>: 592.0876; Found: 592.0874.

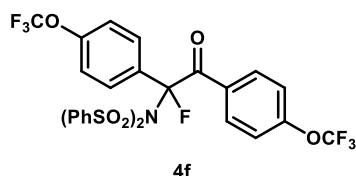

*time* = 12 h; Column chromatography (SiO<sub>2</sub>,  $\phi$  = 3.5 cm, *l* = 12 cm, EtOAc:hexanes = 1:5, *R<sub>f</sub>* = 0.4, UV 254 nm) afforded **4f** along with recovered **1f** (50 mg, 14%). The residual solvent was removed by freeze-drying (MeCN) to give **4f** (504 mg, 74%) as white solid.

Data for *N*-[1-fluoro-2-oxo-1,2-bis(4-(trifluoromethoxy)phenyl)ethyl]-*N*-(phenylsulfonyl)benzenesulfonimide (**4f**): YRS-03-055

<sup>1</sup>H NMR: (400 MHz, CDCl<sub>3</sub>)

$\delta$  8.14–7.72 (m, 6 H), 7.65 (t, *J* = 7.2, 2H), 7.52–7.50 (m, 4H), 7.37–7.22 (m, 2H), 7.16 (d, *J* = 8.0, 2H), 6.99–6.83 (m, 2H).

<sup>13</sup>C NMR: (100 MHz, CD<sub>3</sub>COCD<sub>3</sub>)

$\delta$  191.6 (d, *J* = 31.5), 153.0, 151.4, 141.1, 135.6, 133.7, 133.3 (d, *J* = 5.7), 132.5 (d, *J* = 9.5), 130.2, 129.1, 128.2 (d, *J* = 25.7), 121.3, 121.28 (q, *J* = 255.5), 121.23 (q, *J* = 256.2), 121.0, 106.0 (d, *J* = 232.6).

<sup>19</sup>F NMR: (376 MHz, CDCl<sub>3</sub>)

$\delta$  –60.78, –60.80, –115.4.

HRMS (ESI): Calcd for C<sub>28</sub>H<sub>21</sub>F<sub>4</sub>NO<sub>6</sub>S<sub>2</sub>Na [M+Na]<sup>+</sup>: 700.0311; Found: 700.0302.

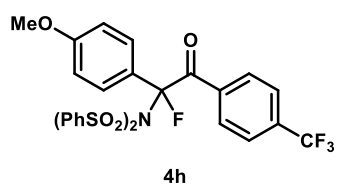

*time* = 1 h; Column chromatography (SiO<sub>2</sub>,  $\phi$  = 3.5 cm, *l* = 12 cm, EtOAc:hexanes = 1:2, *R<sub>f</sub>* = 0.5, UV 254 nm) afforded **4h** along with recovered **1h** (205 mg, 67%). The residual solvent was removed by freeze-drying (MeCN) to give **4h** (152 mg, 25%) as beige solid.

Data for *N*-[1-fluoro-1-(methoxyphenyl)-2-oxo-2-(4-(trifluoromethyl)phenyl)ethyl]-*N*-(phenylsulfonyl)benzenesulfonimide (**4h**): YRS-03-053

<sup>1</sup>H NMR: (400 MHz, CDCl<sub>3</sub>)

$\delta$  8.03–7.81 (m, 4H), 7.77 (d, *J* = 8.0, 2H), 7.63 (t, *J* = 7.4, 2H), 7.57 (d, *J* = 8.8, 2H), 7.51–7.49 (m, 4H), 7.21–7.02 (m, 2H), 6.67–6.51 (m, 2H), 3.78 (s, 3H).

<sup>13</sup>C NMR: (100 MHz, CD<sub>2</sub>Cl<sub>2</sub>)

$\delta$  191.5 (d, *J* = 32.4), 161.4, 140.2, 137.7, 134.2, 133.6 (q, *J* = 32.4), 131.1 (d, *J* = 9.5), 130.2 (d, *J* = 5.7), 128.9, 128.3, 125.1 (d, *J* = 3.8), 123.7 (q, *J* = 271.3), 119.1 (d, *J* = 24.8), 113.5, 105.5 (d, *J* = 229.8), 55.5.

<sup>19</sup>F NMR: (376 MHz, CDCl<sub>3</sub>)

$\delta$  –66.5, –115.3.

HRMS (ESI): Calcd for C<sub>28</sub>H<sub>21</sub>F<sub>4</sub>NO<sub>6</sub>S<sub>2</sub>Na [M+Na]<sup>+</sup>: 630.0644; Found: 630.0635.

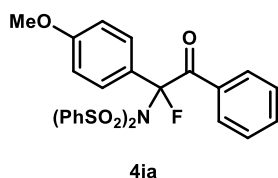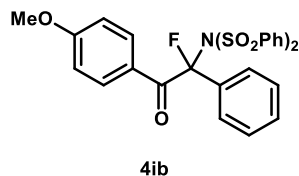

*time* = 1 h; Column chromatography (SiO<sub>2</sub>,  $\phi$  = 4.0 cm, *l* = 12 cm, EtOAc:hexanes = 1:5 → 1:2, *R<sub>f</sub>* = 0.2 in EtOAc:hexanes = 1:5, UV 254 nm) afforded a mixture of **4ia** and **4ib** along with recovered **1i** (83 mg, 35%). In this case, the complete removal of residual solvents from the product was difficult. Thus, the chromatographed material was repeatedly diluted with CH<sub>2</sub>Cl<sub>2</sub> and concentrated under reduced pressure 5 times. Then, the residue was dried using a Büchi B585 glass oven (200 mTorr, 65 °C) for 12 h to give a mixture of **4ia** and **4ib** (257 mg, 48%, 63:37 rr) as beige solid. The isomeric ratio was determined by integration of the MeO peaks in the <sup>1</sup>H NMR spectrum ( $\delta$  3.79 for **4ib**,  $\delta$  3.76 for **4ia**). Accurate full assignment was difficult. Copies of <sup>1</sup>H and <sup>13</sup>C NMR spectra are given at the end of the ESI.

Data for *N*-[1-fluoro-1-(4-methoxyphenyl)-2-oxo-2-phenylethyl]-*N*-(phenylsulfonyl)benzenesulfonimide (**4ia**) and *N*-[1-fluoro-2-(4-methoxyphenyl)-2-oxo-1-phenylethyl]-*N*-(phenylsulfonyl)benzenesulfonimide (**4ib**): SJB-02-024

<sup>19</sup>F NMR: (376 MHz, CD<sub>3</sub>CN)

$\delta$  -112.0 (**4ib**), -112.2 (**4ia**).

HRMS (ESI): Calcd for C<sub>27</sub>H<sub>22</sub>FNO<sub>6</sub>S<sub>2</sub>NH<sub>4</sub> [M+NH<sub>4</sub>]<sup>+</sup>, C<sub>27</sub>H<sub>22</sub>FNO<sub>6</sub>S<sub>2</sub>Na [M+Na]<sup>+</sup>: 557.1217, 562.0771;

Found: 557.1206, 562.0757.

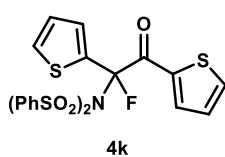

*time* = 3 h; Column chromatography (SiO<sub>2</sub>,  $\phi$  = 4.0 cm, *l* = 7.0 cm, EtOAc:hexanes = 1:1, *R<sub>f</sub>* = 0.7, UV 254 nm) afforded **4k**. In this case, the complete removal of residual solvents from the product was difficult. Thus, the chromatographed material was repeatedly diluted with CH<sub>2</sub>Cl<sub>2</sub> and concentrated under reduced pressure 5 times. Then, the residue was dried using a Büchi B585 glass oven (200 mTorr, 40 °C) for 30 min to give **4k** (153 mg, 29%) as red solid.

Data for *N*-[1-fluoro-2-oxo-1,2-bis(2-thienyl)ethyl]-*N*-(phenylsulfonyl)benzenesulfonimide (**4k**): SJB-02-054

<sup>1</sup>H NMR: (400 MHz, CDCl<sub>3</sub>)

$\delta$  7.93–7.91 (m, 5H), 7.66–7.60 (m, 3H), 7.50 (t, *J* = 7.8, 4H), 7.30–7.29 (m, 1H), 7.07 (t, *J* = 4.4, 1H), 6.68–6.67 (m, 2H).

<sup>13</sup>C NMR: (100 MHz, CDCl<sub>3</sub>)

$\delta$  183.1 (d, *J* = 28.6), 140.2, 137.81, 137.76, 135.66 (d, *J* = 5.7), 135.59 (d, *J* = 1.9), 134.1, 132.9 (d, *J* = 5.8), 131.6 (d, *J* = 28.1), 131.0, 129.0, 128.5, 126.7, 104.2 (d, *J* = 228.8).

<sup>19</sup>F NMR: (376 MHz, CDCl<sub>3</sub>)

$\delta$  -103.1.

HRMS (FAB): Calcd for C<sub>22</sub>H<sub>16</sub>NO<sub>5</sub>S<sub>4</sub> [M-F]<sup>+</sup>: 501.9911; Found: 501.9914.

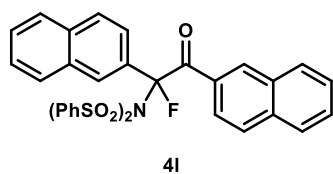

*time* = 1 h; Column chromatography (SiO<sub>2</sub>,  $\phi$  = 4.0 cm, *l* = 12 cm, EtOAc:hexanes = 1:5, *R<sub>f</sub>* = 0.3, UV 254 nm) afforded **4I** along with recovered **1I** (30 mg, 10%). In this case, the complete removal of residual solvents from the product was difficult. Thus, the chromatographed material was repeatedly diluted with CH<sub>2</sub>Cl<sub>2</sub> and concentrated under reduced pressure 5 times. The residue was dried using a Büchi B585 glass oven (200 mTorr, 60 °C) for 13 h to give **4I** (474 mg, 78%) as pale yellow solid.

Data for *N*-[1-fluoro-1,2-bis(2-naphthyl)-2-oxoethyl]-*N*-(phenylsulfonyl)benzenesulfonimide (**4I**): SJB-02-048

<sup>1</sup>H NMR: (400 MHz, CDCl<sub>3</sub>)

$\delta$  8.39 (s, 2H), 8.30–6.80 (m, 22H).

<sup>13</sup>C NMR: (100 MHz, CDCl<sub>3</sub>)

$\delta$  192.0 (d, *J* = 30.5), 140.6, 135.3, 134.1, 133.7, 132.14, 132.09, 131.9, 131.5 (d, *J* = 1.9), 130.4, 130.3, 129.8, 129.1, 128.8, 128.7, 128.6, 128.1 (d, *J* = 9.6), 127.8, 127.6, 127.5, 126.6 (d, *J* = 9.5), 126.4 (d, *J* = 24.8), 125.7 (d, *J* = 3.8) 125.6, 125.5, 106.2 (d, *J* = 232.6).

<sup>19</sup>F NMR: (376 MHz, CDCl<sub>3</sub>)

$\delta$  -114.5.

HRMS (ESI): Calcd for C<sub>68</sub>H<sub>48</sub>F<sub>2</sub>N<sub>2</sub>O<sub>10</sub>S<sub>4</sub>NH<sub>4</sub> [2M+NH<sub>4</sub>]<sup>+</sup>, C<sub>34</sub>H<sub>24</sub>FNO<sub>5</sub>S<sub>2</sub>Na [M+Na]<sup>+</sup>, C<sub>34</sub>H<sub>24</sub>FNO<sub>5</sub>S<sub>2</sub>NH<sub>4</sub> [M+NH<sub>4</sub>]<sup>+</sup>: 1236.2504, 632.0978, 627.1424; Found: 1236.2498, 632.0969, 627.1418.

## 2.4. Geminal Fluorosulfonimidation of Aryl-Alkyl 1,2-Diketones

General procedure for **4m** and **4n**: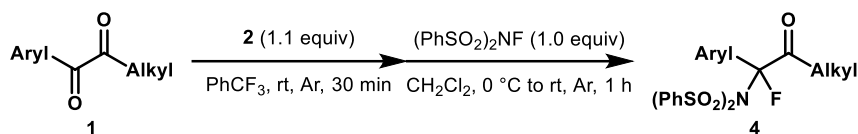

To a solution of **1** (1.00 mmol) in PhCF<sub>3</sub> (0.5 mL) was added a solution of **2** (224 mg, 1.10 mmol) in PhCF<sub>3</sub> (1.5 mL) then rinsed with 0.5 mL at rt. After stirring for 30 min, a solution of (PhSO<sub>2</sub>)<sub>2</sub>NF (315 mg, 1.00 mmol) in CH<sub>2</sub>Cl<sub>2</sub> (2.5 mL) was added dropwise at 0 °C, and then the reaction mixture was warmed to rt. After 1 h, the reaction mixture was diluted with EtOAc (50 mL) and washed with brine (50 mL × 3). The combined aqueous layers were extracted with EtOAc (100 mL). The combined organic extracts were dried over MgSO<sub>4</sub> (10 g), filtered through a glass frit, and concentrated under reduced pressure. The residue was purified by column chromatography to give **4** along with recovered **1**.

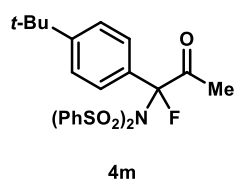

Column chromatography (SiO<sub>2</sub>,  $\phi$  = 4.0 cm,  $l$  = 12 cm, EtOAc:hexanes = 1:5,  $R_f$  = 0.4, UV 254 nm) afforded **4m** along with recovered **1m** (95 mg, 47%). To remove the residual grease, an additional flash column chromatography (SiO<sub>2</sub>,  $\phi$  = 4.0 cm,  $l$  = 12 cm, EtOAc:distilled hexanes = 1:10,  $R_f$  = 0.3, UV 254 nm) was performed. In this case, the complete removal of residual solvents from the product was difficult. Thus, the chromatographed material was repeatedly diluted with CH<sub>2</sub>Cl<sub>2</sub> and concentrated under reduced pressure 5 times. Then, the residue was dried using a Büchi B585 glass oven (200 mTorr, 65 °C) for 12 h to give **4m** (120 mg, 24%) as white solid.

Data for *N*-[2-(4-*tert*-butylphenyl)-1-fluoro-1-methyl-2-oxoethyl]-*N*-(phenylsulfonyl)benzenesulfonimide (**4m**): SJB-01-098

<sup>1</sup>H NMR: (400 MHz, CDCl<sub>3</sub>)

$\delta$  7.75 (d,  $J$  = 7.2, 4H), 7.58 (t,  $J$  = 7.6, 2H), 7.42 (t,  $J$  = 7.8, 4H), 7.09–7.02 (m, 4H), 2.23 (d,  $J$  = 4.4, 3H), 1.27 (s, 9H).

<sup>13</sup>C NMR: (100 MHz, CDCl<sub>3</sub>)

$\delta$  199.4 (d,  $J$  = 33.4), 153.4, 140.4, 134.0, 129.2 (d,  $J$  = 9.5), 128.9, 128.4, 124.8 (d,  $J$  = 24.8), 124.6 (d,  $J$  = 2.1), 104.4 (d,  $J$  = 229.8), 34.7, 31.2, 24.9.

<sup>19</sup>F NMR: (376 MHz, CDCl<sub>3</sub>)

$\delta$  -121.3.

HRMS (ESI): Calcd for C<sub>25</sub>H<sub>26</sub>FNO<sub>5</sub>S<sub>2</sub>NH<sub>4</sub> [M+NH<sub>4</sub>]<sup>+</sup>, C<sub>25</sub>H<sub>26</sub>FNO<sub>5</sub>S<sub>2</sub>Na [M+Na]<sup>+</sup>: 521.1580, 526.1134;

Found: 521.1576, 526.1124.

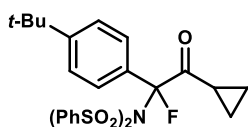

4na

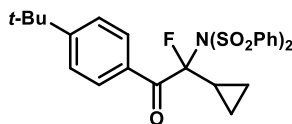

4nb

Column chromatography ( $\text{SiO}_2$ ,  $\phi = 4.0$  cm,  $l = 12$  cm, EtOAc:hexanes = 1:5,  $R_f = 0.24$  and  $R_f = 0.16$ , UV 254 nm) afforded a mixture of **4na** and **4nb** along with recovered **1n** (16 mg, 7%). In this case, the complete removal of residual solvents from the product was difficult. Thus, the chromatographed material was repeatedly diluted with  $\text{CH}_2\text{Cl}_2$  and concentrated under reduced pressure 5 times. Then, the residue was dried using a Büchi B585 glass oven (200 mTorr, 65 °C) for 13 h to give a mixture of **4na** and **4nb** (401 mg, 76%, 78:22 rr) as white solid. The isomeric ratio was determined by integration of the phenyl peaks in  $^1\text{H}$  NMR spectra ( $\delta$  8.16–8.14 for **4nb**,  $\delta$  7.77–7.75 for **4na**). Accurate full assignment was difficult. A copy of  $^{13}\text{C}$  NMR spectrum is given at the end of SI.

Data for *N*-[1-(4-*tert*-butylphenyl)-2-cyclopropyl-1-fluoro-2-oxoethyl]-*N*-(phenylsulfonyl)benzenesulfonimide (**4na**):

SJB-02-050

$^1\text{H}$  NMR: (400 MHz,  $\text{CDCl}_3$ )

$\delta$  7.76 (d,  $J = 8.0$ , 4H), 7.59–7.55 (m, 2H), 7.42 (t,  $J = 7.6$ , 4H), 7.06–7.01 (m, 4H), 2.35–2.28 (m, 1H), 1.34–1.23 (m, 10H), 1.12–1.05 (m, 1H), 0.88–0.81 (m, 1H), 0.81–0.72 (m, 1H).

$^{19}\text{F}$  NMR: (376 MHz,  $\text{CDCl}_3$ )

$\delta$  -121.7.

HRMS (ESI): Calcd for  $\text{C}_{54}\text{H}_{56}\text{F}_2\text{N}_2\text{O}_{10}\text{S}_4\text{Na}$  [ $2\text{M}+\text{Na}$ ] $^+$ ,  $\text{C}_{27}\text{H}_{28}\text{FNO}_5\text{S}_2\text{Na}$  [ $\text{M}+\text{Na}$ ] $^+$ ,  $\text{C}_{27}\text{H}_{28}\text{FNO}_5\text{S}_2\text{NH}_4$  [ $\text{M}+\text{NH}_4$ ] $^+$ : 1081.2684, 552.1291, 547.1737; Found: 1081.2674, 552.1284, 547.1734.

Data for *N*-[2-(4-*tert*-butylphenyl)-1-cyclopropyl-1-fluoro-2-oxoethyl]-*N*-(phenylsulfonyl)benzenesulfonimide (**4nb**):

SJB-02-050

$^1\text{H}$  NMR: (400 MHz,  $\text{CDCl}_3$ )

$\delta$  8.15 (d,  $J = 8.0$ , 4H), 8.01–7.99 (m, 2H), 7.68–7.64 (m, 2H), 7.60–7.55 (m, 4H), 7.06–7.01 (m, 2H), 1.35–1.32 (m, 10H), 0.49–0.47 (m, 2H), 0.37–0.30 (m, 1H), 0.29–0.26 (m, 1H).

$^{19}\text{F}$  NMR: (376 MHz,  $\text{CDCl}_3$ )

$\delta$  -121.7.

HRMS (ESI): Calcd for  $\text{C}_{54}\text{H}_{56}\text{F}_2\text{N}_2\text{O}_{10}\text{S}_4\text{Na}$  [ $2\text{M}+\text{Na}$ ] $^+$ ,  $\text{C}_{27}\text{H}_{28}\text{FNO}_5\text{S}_2\text{Na}$  [ $\text{M}+\text{Na}$ ] $^+$ ,  $\text{C}_{27}\text{H}_{28}\text{FNO}_5\text{S}_2\text{NH}_4$  [ $\text{M}+\text{NH}_4$ ] $^+$ : 1081.2684, 552.1291, 547.1737; Found: 1081.2674, 552.1284, 547.1734.

### 3. DFT Calculation

Approximate transition structures for the electrophilic fluorination of benzil-derived dioxaphospholene was obtained by the PM7 semi-empirical method using MOPAC 2016.<sup>5</sup> These saddle points were refined by DFT calculation at the M062X-D3<sup>6,7</sup>/6-31+G(d,p) level of theory using the Gaussian 16 suite of programs.<sup>8</sup> Four different approaches of NFSI onto the C=C double bond of dioxaphospholene were examined, and the most stable TS was selected. Each phenyl ring in this structure was replaced by a methyl group, and then saddle point optimizations was performed for the fluorination of 1-phenyl-1,2-propanedione at each nucleophilic carbon. These TSs were verified by the presence of a single negative frequency as well as the Intrinsic Reaction Coordinate (IRC) calculation at the same level of theory. The reactants and the products from the IRC profiles were further optimized to give the ground state structures that lack imaginary frequency. Subsequently, the TS for the nucleophilic amination was located by a relaxed coordinate scan from the  $\alpha$ -oxyphosphonium intermediate. In all of these calculations, the solvent effect was considered with the polarizable continuum model (PCM) for CH<sub>2</sub>Cl<sub>2</sub>.<sup>9</sup> More precise single point energies for the optimized structures were obtained with def2TZVP basis set<sup>10</sup> after thermal free energy correction. The 3-D illustrations were produced using CYLview 1.0b.<sup>11</sup>

#### 3.1. Geminal Fluorosulfonimidation of Diphenyl 1,2-Diketone (Benzil)

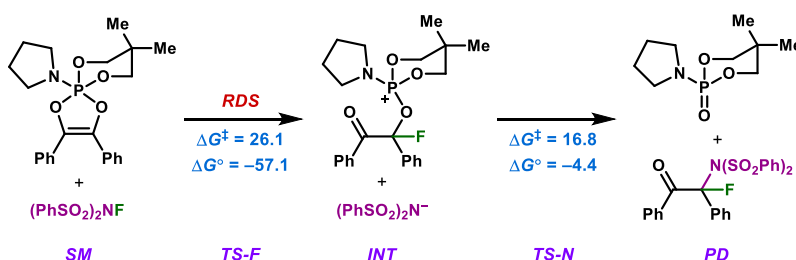

- computed data for **SM**

: total free energy = -3304.800348 Hartree

: relative free energy = 0.0 kcal/mol

: no imaginary frequency

: Cartesian coordinates

| Atom | X          | Y           | Z           |
|------|------------|-------------|-------------|
| C    | 3.84210200 | 2.36464300  | -1.20654700 |
| C    | 1.63585700 | 2.04098200  | -2.18552800 |
| N    | 2.72222000 | 1.41336700  | -1.38826500 |
| P    | 2.68405300 | -0.11715200 | -0.75703400 |
| O    | 3.50601300 | -1.31233500 | -1.51546400 |
| O    | 3.90850500 | 0.29064800  | 0.29946000  |
| C    | 4.18605000 | -2.31073600 | -0.73775700 |
| C    | 5.25894200 | -1.72678300 | 0.17957300  |
| H    | 4.62753800 | -2.99593500 | -1.46721600 |
| H    | 3.44214000 | -2.86333600 | -0.14620500 |
| C    | 4.57046900 | -0.69542500 | 1.07478500  |
| H    | 5.30833100 | -0.16355100 | 1.68715100  |
| H    | 3.85243700 | -1.18725500 | 1.74587800  |
| O    | 1.30345200 | -0.44519300 | -1.75599300 |



|   |             |             |             |
|---|-------------|-------------|-------------|
| O | 1.82962000  | -0.76320800 | 0.51681900  |
| C | 0.40533800  | -1.26679500 | -1.15467400 |
| C | 0.66326600  | -1.42209000 | 0.15783200  |
| C | -0.67181200 | -1.77550300 | -2.01182100 |
| C | -0.07993300 | -2.01110100 | 1.27295800  |
| C | -1.48134400 | -1.97507300 | 1.31655400  |
| C | 0.61984600  | -2.54807200 | 2.36232900  |
| C | -0.06689500 | -3.05553900 | 3.46269800  |
| C | -1.46167900 | -3.02739600 | 3.49421700  |
| C | -2.16526100 | -2.48585000 | 2.41608600  |
| C | -1.26931500 | -3.02382800 | -1.78980900 |
| C | -2.25655900 | -3.49138900 | -2.65217600 |
| C | -2.65813200 | -2.72425200 | -3.74837200 |
| C | -2.05963200 | -1.48475700 | -3.97939400 |
| C | -1.07013200 | -1.01325200 | -3.11910600 |
| H | -0.94575000 | -3.63395600 | -0.95156000 |
| H | -2.70565500 | -4.46416800 | -2.47520000 |
| H | -3.42571000 | -3.09395600 | -4.42102000 |
| H | -2.36413200 | -0.88245100 | -4.82957200 |
| H | -0.59894000 | -0.05101600 | -3.29385100 |
| H | 1.70614800  | -2.55372700 | 2.34338400  |
| H | 0.48805000  | -3.46932600 | 4.29916100  |
| H | -1.99659300 | -3.41796800 | 4.35408900  |
| H | -3.25054900 | -2.44464600 | 2.43553900  |
| H | -2.03288900 | -1.53132400 | 0.49326800  |
| H | 0.66742000  | 1.90545300  | -1.70048200 |
| H | 1.58812300  | 1.59183000  | -3.18299600 |
| C | 2.04346200  | 3.51134600  | -2.26259200 |
| C | 3.56928100  | 3.44438000  | -2.25051600 |
| H | 4.80184500  | 1.86637400  | -1.34583000 |
| H | 3.82814000  | 2.78587400  | -0.19322200 |
| C | 5.83424500  | -2.84862500 | 1.04377300  |
| C | 6.36022600  | -1.06243000 | -0.64933800 |
| N | -2.17290400 | 1.48155300  | 0.50676100  |
| F | -1.28532100 | 0.73396700  | -0.26776500 |
| S | -1.26251200 | 2.91274100  | 0.99932600  |
| S | -3.59794800 | 1.69776300  | -0.52300300 |
| O | -3.16364900 | 1.73481300  | -1.90357900 |
| O | -4.30796400 | 2.79973700  | 0.09372800  |
| O | -0.73928100 | 3.60373400  | -0.16582500 |
| O | -2.15921800 | 3.57741300  | 1.92456700  |
| C | 0.04439400  | 2.09012600  | 1.85766900  |
| C | -4.39871500 | 0.16388400  | -0.17329200 |
| C | -4.19616000 | -0.91591700 | -1.02880300 |
| C | -4.81596700 | -2.12384400 | -0.71088800 |
| C | -5.17729000 | 0.08369900  | 0.98159300  |
| C | -5.78594700 | -1.13042200 | 1.27971000  |
| C | -5.60385700 | -2.22846600 | 0.43499000  |
| H | -6.08065200 | -3.17365600 | 0.67357500  |
| H | -4.67814900 | -2.98007900 | -1.36161700 |

|   |             |             |             |
|---|-------------|-------------|-------------|
| H | -5.30445400 | 0.95209100  | 1.61962600  |
| H | -6.40095100 | -1.21960500 | 2.16848500  |
| H | -3.57302100 | -0.81478000 | -1.91345200 |
| C | 1.35629000  | 2.42842800  | 1.53909000  |
| C | 2.38016200  | 1.87575200  | 2.30561000  |
| C | 2.07882400  | 0.98631500  | 3.33442600  |
| C | 0.75507500  | 0.64246400  | 3.61840500  |
| C | -0.28311400 | 1.20390100  | 2.88442500  |
| H | 1.56322000  | 3.10968200  | 0.71947900  |
| H | 3.41146900  | 2.11875800  | 2.07785900  |
| H | 2.88320100  | 0.54949800  | 3.91823900  |
| H | 0.52905500  | -0.06339800 | 4.41037900  |
| H | -1.31887400 | 0.95743800  | 3.09648000  |
| H | 5.05374500  | -3.33492300 | 1.63941400  |
| H | 6.58981900  | -2.45263200 | 1.73035900  |
| H | 6.31345400  | -3.61117700 | 0.42097200  |
| H | 7.12048000  | -0.62473000 | 0.00645200  |
| H | 6.84927100  | -1.79787600 | -1.29701200 |
| H | 5.95102900  | -0.26852400 | -1.27983200 |
| H | 1.67915100  | 4.04949100  | -1.37991200 |
| H | 1.62991700  | 3.99989200  | -3.14753400 |
| H | 3.93946600  | 3.11997600  | -3.22935200 |
| H | 4.04978600  | 4.39158900  | -1.99555400 |

- computed data for *TS-F*

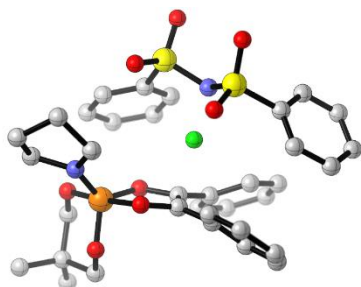

: total free energy = -3304.758701 Hartree

: relative free energy = 26.13 kcal/mol

: a single imaginary frequency at -743.46 cm<sup>-1</sup>

: Cartesian coordinates

| Atom | X           | Y           | Z           |
|------|-------------|-------------|-------------|
| C    | -3.76236400 | 2.20700800  | 1.36759200  |
| C    | -1.50436300 | 2.06986900  | 2.29353900  |
| N    | -2.55082400 | 1.35842600  | 1.50645500  |
| P    | -2.42921800 | -0.14592900 | 0.86322500  |
| O    | -3.04868800 | -1.43272900 | 1.64314400  |
| O    | -3.70692400 | 0.12430000  | -0.13963800 |
| C    | -3.67196900 | -2.49841100 | 0.90010600  |
| C    | -4.83710900 | -2.02262500 | 0.03547700  |
| H    | -4.00894500 | -3.21334500 | 1.65515500  |

|   |             |             |             |
|---|-------------|-------------|-------------|
| H | -2.90661800 | -2.98412700 | 0.27844500  |
| C | -4.29978600 | -0.92973300 | -0.88815600 |
| H | -5.11204200 | -0.47458900 | -1.46546700 |
| H | -3.56394600 | -1.33976300 | -1.59330300 |
| O | -0.94448900 | -0.36887900 | 1.83301300  |
| O | -1.51816000 | -0.69306900 | -0.43633300 |
| C | -0.02994400 | -1.09028100 | 1.22424200  |
| C | -0.30709900 | -1.23467700 | -0.13617100 |
| C | 1.06148100  | -1.61119900 | 2.04770900  |
| C | 0.31957900  | -2.01369100 | -1.20792900 |
| C | 1.71310000  | -2.09046500 | -1.35157000 |
| C | -0.50516000 | -2.65725900 | -2.14022900 |
| C | 0.05300400  | -3.39117200 | -3.18379900 |
| C | 1.43844800  | -3.47972300 | -3.31322600 |
| C | 2.26419700  | -2.82580100 | -2.39558700 |
| C | 1.67203200  | -2.84397800 | 1.78088000  |
| C | 2.65666000  | -3.32821000 | 2.63621300  |
| C | 3.03794100  | -2.59041200 | 3.75832400  |
| C | 2.42113000  | -1.36825700 | 4.03383900  |
| C | 1.43041600  | -0.88157700 | 3.18716700  |
| H | 1.36296600  | -3.43230700 | 0.92341100  |
| H | 3.12270700  | -4.28632100 | 2.42971300  |
| H | 3.80821800  | -2.97129000 | 4.42160900  |
| H | 2.71268900  | -0.79470800 | 4.90757700  |
| H | 0.94597700  | 0.06821600  | 3.38742500  |
| H | -1.58364300 | -2.57417600 | -2.04643000 |
| H | -0.59546900 | -3.88808500 | -3.89822200 |
| H | 1.87435500  | -4.04648000 | -4.12963800 |
| H | 3.34353600  | -2.87423700 | -2.50106700 |
| H | 2.35767900  | -1.55674300 | -0.65914500 |
| H | -0.53476100 | 2.00127400  | 1.79992600  |
| H | -1.42989000 | 1.63430000  | 3.29547900  |
| C | -2.02270200 | 3.50386800  | 2.34981100  |
| C | -3.53800900 | 3.31946200  | 2.38828800  |
| H | -4.66463300 | 1.62551700  | 1.55904600  |
| H | -3.82920500 | 2.60717800  | 0.34977200  |
| C | -5.33348500 | -3.19645700 | -0.80920900 |
| C | -5.96065600 | -1.47292600 | 0.91723000  |
| N | 1.91895800  | 1.70368800  | -0.82496800 |
| F | 0.94897000  | 0.40545900  | -0.17295900 |
| S | 0.84145800  | 2.95335500  | -1.17996000 |
| S | 3.08904600  | 1.93446200  | 0.36839400  |
| O | 2.54842600  | 1.83889200  | 1.71720200  |
| O | 3.82569300  | 3.14036100  | -0.00533300 |
| O | 0.26695300  | 3.56050100  | 0.01735200  |
| O | 1.52407000  | 3.82728000  | -2.13197500 |
| C | -0.41058200 | 2.01949500  | -2.02281100 |
| C | 4.05859400  | 0.48695200  | 0.02704800  |
| C | 4.25803400  | -0.44697100 | 1.03648400  |
| C | 5.02075600  | -1.58056900 | 0.74823400  |

|   |             |             |             |
|---|-------------|-------------|-------------|
| C | 4.58840600  | 0.32998900  | -1.25447100 |
| C | 5.33844900  | -0.80801000 | -1.52735400 |
| C | 5.55168000  | -1.76167200 | -0.52697700 |
| H | 6.13577000  | -2.64972600 | -0.74654500 |
| H | 5.18821100  | -2.32204200 | 1.52193500  |
| H | 4.40298000  | 1.07699200  | -2.01988300 |
| H | 5.75300000  | -0.95447300 | -2.51916600 |
| H | 3.81763900  | -0.29414000 | 2.01643800  |
| C | -1.73677500 | 2.31984600  | -1.73777100 |
| C | -2.73543100 | 1.66774600  | -2.46061100 |
| C | -2.39450400 | 0.72190600  | -3.42370600 |
| C | -1.05374700 | 0.42016400  | -3.67887300 |
| C | -0.04487500 | 1.07674600  | -2.98335200 |
| H | -1.97461400 | 3.04417500  | -0.96454000 |
| H | -3.77710100 | 1.88588600  | -2.25060400 |
| H | -3.17602900 | 0.20935800  | -3.97651000 |
| H | -0.79269400 | -0.32904800 | -4.41917500 |
| H | 1.00147700  | 0.85224700  | -3.16574600 |
| H | -4.53678700 | -3.59498000 | -1.44717200 |
| H | -6.15963900 | -2.87901100 | -1.45354600 |
| H | -5.69810700 | -4.00702700 | -0.17016500 |
| H | -6.78725400 | -1.10814600 | 0.29874800  |
| H | -6.34644400 | -2.25657700 | 1.57749400  |
| H | -5.60568500 | -0.64622500 | 1.53850700  |
| H | -1.72423600 | 4.03483300  | 1.43979100  |
| H | -1.62274800 | 4.04411100  | 3.21051300  |
| H | -3.85322500 | 2.98440400  | 3.38254700  |
| H | -4.09807900 | 4.22189900  | 2.13396600  |

- computed data for *INT*

: total free energy = -3304.891289 Hartree

: relative free energy = -57.07 kcal/mol

: no imaginary frequency

: Cartesian coordinates

| Atom | X          | Y           | Z           |
|------|------------|-------------|-------------|
| C    | 2.78310900 | 3.52214200  | 0.48337600  |
| C    | 4.39865200 | 3.18519900  | -1.35417800 |
| N    | 3.57583300 | 2.53056800  | -0.29941400 |
| P    | 3.65816800 | 0.97114300  | 0.00804100  |
| O    | 3.74908400 | 0.19629500  | -1.34925400 |
| O    | 4.91802600 | 0.56131300  | 0.85837100  |
| C    | 4.31776400 | -1.15346200 | -1.43415900 |
| C    | 5.59295100 | -1.30148000 | -0.60390000 |
| H    | 4.51093600 | -1.29700800 | -2.49744300 |
| H    | 3.54276600 | -1.85407900 | -1.11097800 |
| C    | 5.31936600 | -0.84569400 | 0.82942300  |
| H    | 6.21890700 | -0.89135700 | 1.44318200  |

|   |             |             |             |
|---|-------------|-------------|-------------|
| H | 4.52676800  | -1.43826300 | 1.30149400  |
| O | 1.00951000  | -1.03154800 | -1.53592800 |
| O | 2.44113800  | 0.50662500  | 0.91277100  |
| C | 1.12703000  | -1.07245100 | -0.33537200 |
| C | 1.07968100  | 0.27377300  | 0.44636400  |
| C | 1.46208000  | -2.33111700 | 0.39363600  |
| C | 0.17941800  | 0.36127800  | 1.65486300  |
| C | -0.80244900 | -0.59964700 | 1.90213700  |
| C | 0.34316400  | 1.43865700  | 2.52842600  |
| C | -0.46175100 | 1.54978000  | 3.65980700  |
| C | -1.42170700 | 0.57331200  | 3.92692500  |
| C | -1.59128500 | -0.49475600 | 3.04702400  |
| C | 1.93705700  | -2.36210000 | 1.71217600  |
| C | 2.29614500  | -3.57725100 | 2.29193700  |
| C | 2.17134700  | -4.76245700 | 1.56764900  |
| C | 1.68575400  | -4.73647400 | 0.25814000  |
| C | 1.33526700  | -3.52591400 | -0.32759600 |
| H | 2.03629600  | -1.45022500 | 2.29186100  |
| H | 2.66965600  | -3.59606600 | 3.31036100  |
| H | 2.44744000  | -5.70733900 | 2.02495700  |
| H | 1.57735000  | -5.65945000 | -0.30158000 |
| H | 0.94622100  | -3.48208300 | -1.33905800 |
| H | 1.10381200  | 2.18635500  | 2.33111600  |
| H | -0.33181900 | 2.39034100  | 4.33334300  |
| H | -2.04015900 | 0.64866500  | 4.81602900  |
| H | -2.34656800 | -1.24804300 | 3.24864100  |
| H | -0.96451200 | -1.41490100 | 1.20233700  |
| H | 4.36499900  | 2.59822500  | -2.27324500 |
| H | 5.43491600  | 3.27736300  | -1.01216600 |
| C | 3.72947700  | 4.55235800  | -1.47497200 |
| C | 3.31734700  | 4.86040700  | -0.03360000 |
| H | 2.94946600  | 3.39235400  | 1.55489800  |
| H | 1.72299300  | 3.39159300  | 0.25235500  |
| C | 5.94360400  | -2.79291600 | -0.56368300 |
| C | 6.73661100  | -0.48848900 | -1.21807600 |
| N | -1.82898200 | 0.08462500  | -0.99009400 |
| F | 0.81668200  | 1.26737500  | -0.43662600 |
| S | -2.60719600 | 1.44587600  | -1.36741200 |
| S | -2.35031900 | -1.35275900 | -1.50001500 |
| O | -1.61207300 | -2.34705700 | -0.69861100 |
| O | -2.29116100 | -1.52973500 | -2.95740200 |
| O | -1.65345500 | 2.54727400  | -1.18655400 |
| O | -3.33326600 | 1.38773400  | -2.64697700 |
| C | -3.84956300 | 1.66248500  | -0.09400800 |
| C | -4.07163900 | -1.49808100 | -1.03214200 |
| C | -4.38094200 | -1.61016200 | 0.32313200  |
| C | -5.71551100 | -1.68071900 | 0.70864000  |
| C | -5.06297800 | -1.44488500 | -2.00480300 |
| C | -6.39968300 | -1.52074900 | -1.60867500 |
| C | -6.72359000 | -1.63797500 | -0.25817800 |

|   |             |             |             |
|---|-------------|-------------|-------------|
| H | -7.76454200 | -1.69115100 | 0.04545200  |
| H | -5.97040700 | -1.76283300 | 1.76049700  |
| H | -4.78323100 | -1.34154400 | -3.04765600 |
| H | -7.18520200 | -1.48370000 | -2.35662200 |
| H | -3.58194700 | -1.63410000 | 1.05880000  |
| C | -3.42517000 | 1.78748800  | 1.22816300  |
| C | -4.37798100 | 1.93371300  | 2.23188800  |
| C | -5.73761100 | 1.95774600  | 1.90832900  |
| C | -6.14492700 | 1.83714000  | 0.58101400  |
| C | -5.19723600 | 1.68714600  | -0.43258800 |
| H | -2.36385400 | 1.76103100  | 1.46258600  |
| H | -4.05968200 | 2.02699900  | 3.26588300  |
| H | -6.47821700 | 2.06937700  | 2.69421100  |
| H | -7.20122400 | 1.84920200  | 0.33084900  |
| H | -5.49169100 | 1.57678700  | -1.47098100 |
| H | 5.14675100  | -3.37833000 | -0.09176600 |
| H | 6.86892100  | -2.94901800 | -0.00164500 |
| H | 6.09616200  | -3.17493000 | -1.57730000 |
| H | 7.63765900  | -0.57615600 | -0.60383300 |
| H | 6.96590800  | -0.86221900 | -2.22000000 |
| H | 6.48607100  | 0.57311800  | -1.30245100 |
| H | 2.84630800  | 4.47576000  | -2.11597800 |
| H | 4.40688400  | 5.29663500  | -1.89628700 |
| H | 4.19143700  | 5.16401800  | 0.55048400  |
| H | 2.56082000  | 5.64294600  | 0.04002900  |

- computed data for *TS-N*

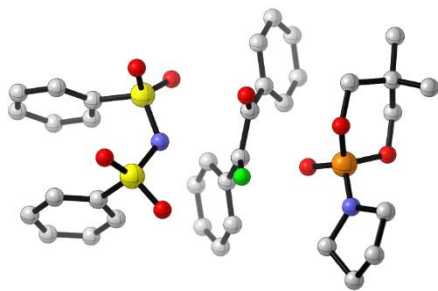

: total free energy = -3304.864452 Hartree

: relative free energy = -40.23 kcal/mol

: a single imaginary frequency at  $-153.53 \text{ cm}^{-1}$

: Cartesian coordinates

| Atom | X           | Y           | Z           |
|------|-------------|-------------|-------------|
| C    | -3.24640100 | -3.48038800 | 0.15446700  |
| C    | -5.26518500 | -2.85354500 | -1.09552300 |
| N    | -4.10094200 | -2.37101000 | -0.32343200 |
| P    | -3.86022600 | -0.81657000 | 0.04011600  |
| O    | -3.95103100 | -0.02450900 | -1.34642700 |
| O    | -5.15597400 | -0.30428800 | 0.83487600  |
| C    | -4.25023400 | 1.39385600  | -1.33161200 |

|   |             |             |             |
|---|-------------|-------------|-------------|
| C | -5.51153800 | 1.71055400  | -0.52536900 |
| H | -4.37119100 | 1.67250500  | -2.38035000 |
| H | -3.38707700 | 1.92964200  | -0.92313500 |
| C | -5.35211400 | 1.12966000  | 0.88150100  |
| H | -6.25439400 | 1.28409200  | 1.47656100  |
| H | -4.49885800 | 1.58623300  | 1.40129400  |
| O | -0.99533800 | 1.09051800  | -1.60304800 |
| O | -2.59444100 | -0.57052800 | 0.81899700  |
| C | -0.91055300 | 1.02702100  | -0.39961000 |
| C | -0.50097900 | -0.35806100 | 0.14999300  |
| C | -1.24658700 | 2.16639600  | 0.49709900  |
| C | 0.13306300  | -0.70257100 | 1.38549800  |
| C | 0.86673800  | 0.26196500  | 2.10213700  |
| C | 0.03258900  | -2.02830800 | 1.84676900  |
| C | 0.62808700  | -2.37525200 | 3.05016300  |
| C | 1.34725100  | -1.41477700 | 3.76947300  |
| C | 1.48027700  | -0.10775600 | 3.29046900  |
| C | -1.70266400 | 2.02849200  | 1.81405000  |
| C | -2.06993800 | 3.16094800  | 2.53911600  |
| C | -1.98113800 | 4.42611100  | 1.96033700  |
| C | -1.52356700 | 4.56525500  | 0.64757100  |
| C | -1.16073300 | 3.44037800  | -0.08198500 |
| H | -1.81086600 | 1.04693300  | 2.25956100  |
| H | -2.43341800 | 3.04965100  | 3.55537300  |
| H | -2.26838800 | 5.30405100  | 2.53038300  |
| H | -1.44598000 | 5.54913400  | 0.19727600  |
| H | -0.79079400 | 3.52848800  | -1.09760800 |
| H | -0.52725700 | -2.75633100 | 1.27012700  |
| H | 0.54178000  | -3.38824200 | 3.42626900  |
| H | 1.81910700  | -1.69172900 | 4.70703500  |
| H | 2.06638600  | 0.61816600  | 3.84325400  |
| H | 0.99588900  | 1.25862800  | 1.69027600  |
| H | -5.38108000 | -2.27403100 | -2.01489700 |
| H | -6.17933300 | -2.76063600 | -0.49727400 |
| C | -4.91323600 | -4.32044800 | -1.35226800 |
| C | -4.12197600 | -4.70923200 | -0.09975200 |
| H | -2.99231900 | -3.34911300 | 1.20876800  |
| H | -2.32358000 | -3.52530600 | -0.43470500 |
| C | -5.62347000 | 3.23255200  | -0.40593300 |
| C | -6.74829000 | 1.12058700  | -1.20796800 |
| N | 1.90005700  | -0.04217800 | -0.93734100 |
| F | -0.68503900 | -1.29400400 | -0.70799000 |
| S | 2.67748000  | -1.34287400 | -1.51041500 |
| S | 2.40565900  | 1.46659900  | -1.24125900 |
| O | 1.64603200  | 2.30200900  | -0.29267500 |
| O | 2.32743800  | 1.84996000  | -2.65463700 |
| O | 1.73855900  | -2.46216100 | -1.36566500 |
| O | 3.29884800  | -1.13439800 | -2.82457000 |
| C | 4.01287600  | -1.65712400 | -0.35945600 |
| C | 4.12512000  | 1.56336200  | -0.76839800 |

|   |             |             |             |
|---|-------------|-------------|-------------|
| C | 4.44931600  | 1.45358300  | 0.58380700  |
| C | 5.78723300  | 1.49651200  | 0.96018100  |
| C | 5.10122400  | 1.70549400  | -1.74775600 |
| C | 6.44091600  | 1.75285500  | -1.35815400 |
| C | 6.78086000  | 1.64874900  | -0.01090900 |
| H | 7.82428200  | 1.68001500  | 0.28693600  |
| H | 6.05652300  | 1.40622500  | 2.00761900  |
| H | 4.80971600  | 1.77521500  | -2.79025800 |
| H | 7.21554200  | 1.86713300  | -2.10939700 |
| H | 3.66226600  | 1.32929900  | 1.32298200  |
| C | 3.68592200  | -1.90042500 | 0.97294200  |
| C | 4.70526900  | -2.13433100 | 1.88951900  |
| C | 6.03750700  | -2.12392200 | 1.46676700  |
| C | 6.34825400  | -1.88138300 | 0.13018900  |
| C | 5.33136200  | -1.64468600 | -0.79665000 |
| H | 2.64474900  | -1.90104800 | 1.28045300  |
| H | 4.46209800  | -2.32326200 | 2.93089800  |
| H | 6.83315700  | -2.30288200 | 2.18313500  |
| H | 7.38379200  | -1.86636800 | -0.19466800 |
| H | 5.55057900  | -1.44181600 | -1.83968800 |
| H | -4.74857400 | 3.65672300  | 0.10057100  |
| H | -6.51794100 | 3.50734200  | 0.16158000  |
| H | -5.69920000 | 3.68984400  | -1.39736000 |
| H | -7.64704900 | 1.33461100  | -0.62094200 |
| H | -6.87619800 | 1.55751000  | -2.20315600 |
| H | -6.66412400 | 0.03569100  | -1.31956500 |
| H | -4.27551500 | -4.39830700 | -2.23851800 |
| H | -5.80264600 | -4.93316200 | -1.50949400 |
| H | -4.80414900 | -4.85904600 | 0.74345300  |
| H | -3.52556600 | -5.61409500 | -0.22945400 |

- computed data for *PD*

: total free energy = -3304.898369 Hartree

: relative free energy = -61.51 kcal/mol

: no imaginary frequency

: Cartesian coordinates

| Atom | X          | Y           | Z           |
|------|------------|-------------|-------------|
| C    | 3.22795400 | 3.40403100  | -0.43839500 |
| C    | 5.38002300 | 2.65187400  | -1.34164200 |
| N    | 4.21150700 | 2.30273800  | -0.51242500 |
| P    | 3.87101700 | 0.79355300  | -0.01871700 |
| O    | 3.99035300 | -0.13459300 | -1.33202400 |
| O    | 5.17136700 | 0.32393100  | 0.82011800  |
| C    | 4.11540800 | -1.55433400 | -1.10169300 |
| C    | 5.34701300 | -1.88352100 | -0.25270700 |
| H    | 4.18737600 | -2.01151900 | -2.09167600 |
| H    | 3.20259700 | -1.91484200 | -0.61415200 |



|   |             |             |             |
|---|-------------|-------------|-------------|
| C | 5.25715800  | -1.09757100 | 1.05957800  |
| H | 6.15406200  | -1.24575200 | 1.66577800  |
| H | 4.37823600  | -1.41371100 | 1.63874000  |
| O | 0.96203700  | -1.04339700 | -1.54488200 |
| O | 2.59562400  | 0.65339500  | 0.72966200  |
| C | 0.55008600  | -0.97849900 | -0.41175500 |
| C | -0.36618400 | 0.28560200  | -0.09900700 |
| C | 0.92215900  | -2.02147600 | 0.60007300  |
| C | -0.54879100 | 0.60389700  | 1.36673700  |
| C | -1.35353400 | -0.23922400 | 2.13549700  |
| C | 0.08543300  | 1.69760200  | 1.94915200  |
| C | -0.09115100 | 1.94790200  | 3.31033400  |
| C | -0.88516800 | 1.10054900  | 4.08459700  |
| C | -1.51547100 | 0.00278100  | 3.49580700  |
| C | 1.36402700  | -1.74818900 | 1.90019000  |
| C | 1.80424700  | -2.79072800 | 2.71552800  |
| C | 1.79933400  | -4.10507000 | 2.25029600  |
| C | 1.36614600  | -4.37999300 | 0.95226400  |
| C | 0.94087300  | -3.34211200 | 0.12932200  |
| H | 1.41603300  | -0.72786200 | 2.25690900  |
| H | 2.15934000  | -2.56839100 | 3.71694200  |
| H | 2.13971000  | -4.91110900 | 2.89310900  |
| H | 1.36539200  | -5.39913400 | 0.57927700  |
| H | 0.60921000  | -3.53973400 | -0.88428800 |
| H | 0.71839000  | 2.32985000  | 1.33859200  |
| H | 0.39630500  | 2.80359200  | 3.76637900  |
| H | -1.01583400 | 1.29725000  | 5.14410900  |
| H | -2.13940400 | -0.65533300 | 4.09178900  |
| H | -1.84640400 | -1.08826400 | 1.66748300  |
| H | 5.60884100  | 1.84721100  | -2.04593000 |
| H | 6.25685900  | 2.82238800  | -0.70561400 |
| C | 4.93492500  | 3.94137400  | -2.03666700 |
| C | 4.01589000  | 4.59097000  | -0.99722900 |
| H | 2.89976500  | 3.55895700  | 0.59199000  |
| H | 2.34954600  | 3.18182800  | -1.05469500 |
| C | 5.31270700  | -3.37684800 | 0.07824400  |
| C | 6.62945600  | -1.51669300 | -1.00317800 |
| N | -1.71618700 | 0.18409000  | -0.73091900 |
| F | 0.30795700  | 1.29441500  | -0.73753100 |
| S | -2.65634200 | 1.64225700  | -0.83933900 |
| S | -2.15007400 | -1.15949300 | -1.72805400 |
| O | -1.55605200 | -2.29719100 | -1.03404900 |
| O | -1.82457800 | -0.89814300 | -3.11718200 |
| O | -1.77552800 | 2.74870700  | -0.52508700 |
| O | -3.32538300 | 1.55181300  | -2.12688500 |
| C | -3.89109100 | 1.57948300  | 0.44108700  |
| C | -3.90821400 | -1.32869600 | -1.56026700 |
| C | -4.40246400 | -1.90900200 | -0.39401100 |
| C | -5.77205800 | -2.13871600 | -0.29770000 |
| C | -4.72441700 | -0.99733000 | -2.63838500 |

|   |             |             |             |
|---|-------------|-------------|-------------|
| C | -6.09127800 | -1.24022200 | -2.52883300 |
| C | -6.61106900 | -1.80385400 | -1.36135100 |
| H | -7.67757600 | -1.98850100 | -1.28302100 |
| H | -6.18057600 | -2.58124800 | 0.60420300  |
| H | -4.29243700 | -0.55437700 | -3.52863900 |
| H | -6.74852000 | -0.98966000 | -3.35422200 |
| H | -3.73109500 | -2.17954900 | 0.41424700  |
| C | -3.55503700 | 2.02979400  | 1.71780800  |
| C | -4.54271500 | 2.04320400  | 2.69777000  |
| C | -5.84010300 | 1.62775600  | 2.39267300  |
| C | -6.16280300 | 1.20898200  | 1.10237700  |
| C | -5.18539000 | 1.18635600  | 0.11032900  |
| H | -2.54793000 | 2.37065300  | 1.93685900  |
| H | -4.29712100 | 2.38480900  | 3.69776300  |
| H | -6.60571600 | 1.64378700  | 3.16158200  |
| H | -7.17544100 | 0.90319900  | 0.86097200  |
| H | -5.42571600 | 0.88616600  | -0.90410800 |
| H | 4.39545300  | -3.64119600 | 0.61768700  |
| H | 6.17073900  | -3.65322800 | 0.69964500  |
| H | 5.35405900  | -3.97397400 | -0.83846800 |
| H | 7.50927600  | -1.74966900 | -0.39430600 |
| H | 6.69926100  | -2.08362000 | -1.93722500 |
| H | 6.65426400  | -0.45076700 | -1.24679200 |
| H | 4.36439100  | 3.69685900  | -2.93868500 |
| H | 5.78067600  | 4.57066500  | -2.32100800 |
| H | 4.61478900  | 5.04709100  | -0.20171300 |
| H | 3.35963800  | 5.35544600  | -1.41768700 |

### 3.2. Geminal Fluorosulfonimidation of Methyl Phenyl 1,2-Diketone (1-Phenyl-1,2-propanedione)

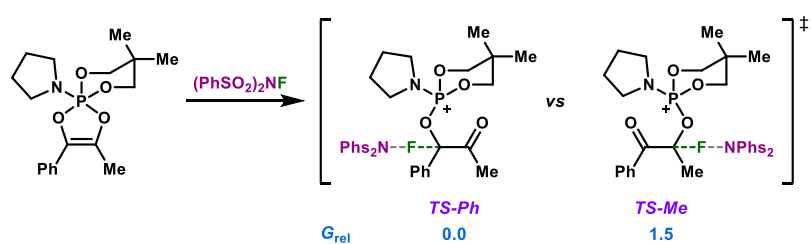

- computed data for *TS-Ph*

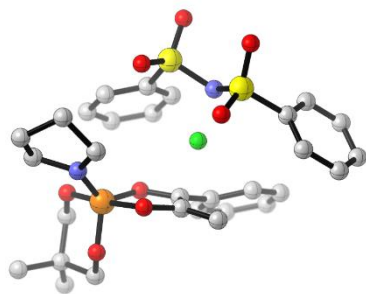

: total free energy = -3113.074461 Hartree

: relative free energy = 0.00 kcal/mol

: a single imaginary frequency at  $-731.91 \text{ cm}^{-1}$

: Cartesian coordinates

| Atom | X           | Y           | Z           |
|------|-------------|-------------|-------------|
| C    | -3.49938600 | -2.64723000 | -0.40222400 |
| C    | -1.35690700 | -2.70778400 | -1.57604400 |
| N    | -2.39674600 | -1.82895300 | -0.96949800 |
| P    | -2.36251700 | -0.18967600 | -0.89187700 |
| O    | -3.17391100 | 0.70808600  | -1.98002600 |
| O    | -3.51307500 | -0.17282400 | 0.28809600  |
| C    | -3.81420900 | 1.93089200  | -1.56530000 |
| C    | -4.84703200 | 1.71819700  | -0.46079300 |
| H    | -4.28202300 | 2.32903800  | -2.46940300 |
| H    | -3.03874500 | 2.63602500  | -1.23382200 |
| C    | -4.12913600 | 1.03902300  | 0.70534500  |
| H    | -4.83945400 | 0.76497400  | 1.49302800  |
| H    | -3.37263500 | 1.70651900  | 1.13987800  |
| O    | -0.99954900 | -0.22998600 | -2.05888100 |
| O    | -1.39393500 | 0.81777800  | 0.02929300  |
| C    | -0.07853300 | 0.66855200  | -1.80978300 |
| C    | -0.26138100 | 1.27890100  | -0.57445800 |
| C    | 0.96913500  | 0.87513100  | -2.83599600 |
| C    | 0.37989100  | 2.43525400  | 0.04648600  |
| C    | 1.74977100  | 2.70008600  | -0.10925900 |
| C    | -0.39646700 | 3.29042700  | 0.84302500  |
| C    | 0.17755000  | 4.40581900  | 1.44539300  |
| C    | 1.53396400  | 4.67885100  | 1.26694800  |
| C    | 2.31548400  | 3.82066900  | 0.49161900  |
| H    | -1.44996300 | 3.07231200  | 0.98768600  |
| H    | -0.43506100 | 5.06050500  | 2.05706100  |
| H    | 1.98264800  | 5.54696000  | 1.73889600  |
| H    | 3.37698800  | 4.01157900  | 0.36810300  |
| H    | 2.37940800  | 2.00858800  | -0.66116400 |
| H    | -0.35927200 | -2.41077400 | -1.25301200 |
| H    | -1.41069900 | -2.65233200 | -2.66783200 |
| C    | -1.73414500 | -4.09770900 | -1.07221200 |
| C    | -3.25770700 | -4.03262300 | -0.99501500 |
| H    | -4.46898900 | -2.22787000 | -0.67210200 |
| H    | -3.43296100 | -2.66572500 | 0.69141800  |
| C    | -5.36898400 | 3.08162100  | -0.00689300 |
| C    | -5.99239600 | 0.83935100  | -0.96809800 |
| N    | 2.34966400  | -1.09687100 | 0.73913100  |
| F    | 1.18171200  | -0.17003000 | -0.13952000 |
| S    | 1.45605500  | -2.23231900 | 1.62162800  |
| S    | 3.38742300  | -1.63282300 | -0.47751400 |
| O    | 2.67967000  | -2.01213700 | -1.69417700 |
| O    | 4.28543700  | -2.60572200 | 0.13912700  |
| O    | 0.84618800  | -3.24778500 | 0.76873500  |
| O    | 2.32565500  | -2.67392600 | 2.70872100  |

|   |             |             |             |
|---|-------------|-------------|-------------|
| C | 0.18926000  | -1.16669400 | 2.26219200  |
| C | 4.22210000  | -0.09247200 | -0.77374800 |
| C | 4.34291800  | 0.35528700  | -2.08533900 |
| C | 4.98278800  | 1.57298500  | -2.31732300 |
| C | 4.73725800  | 0.62170400  | 0.30810200  |
| C | 5.37673100  | 1.83166500  | 0.06042400  |
| C | 5.49068000  | 2.30935900  | -1.24797300 |
| H | 5.98086900  | 3.25978400  | -1.43301300 |
| H | 5.08020000  | 1.94344500  | -3.33208900 |
| H | 4.61950500  | 0.24638100  | 1.31939700  |
| H | 5.77622900  | 2.40709700  | 0.88882100  |
| H | 3.94142400  | -0.23447500 | -2.90221500 |
| C | -1.11994900 | -1.63128000 | 2.23046700  |
| C | -2.11584600 | -0.84898100 | 2.81511800  |
| C | -1.79249800 | 0.37821300  | 3.38733300  |
| C | -0.47168700 | 0.83561400  | 3.38797500  |
| C | 0.53738300  | 0.05773600  | 2.83183200  |
| H | -1.34777300 | -2.58091300 | 1.75558800  |
| H | -3.14473100 | -1.19188100 | 2.79918800  |
| H | -2.57336000 | 0.98827500  | 3.83120800  |
| H | -0.22703700 | 1.79979700  | 3.82142500  |
| H | 1.56822400  | 0.39810400  | 2.82166000  |
| H | -4.55675200 | 3.71925300  | 0.35929800  |
| H | -6.09799700 | 2.95996800  | 0.80073600  |
| H | -5.86600700 | 3.60057900  | -0.83275000 |
| H | -6.72305300 | 0.66823800  | -0.17075300 |
| H | -6.50540300 | 1.32540000  | -1.80447100 |
| H | -5.62308800 | -0.13121100 | -1.31015000 |
| H | -1.30575700 | -4.25495000 | -0.07644300 |
| H | -1.35940300 | -4.88193700 | -1.73342100 |
| H | -3.68999900 | -4.09094600 | -1.99995900 |
| H | -3.70184200 | -4.81933900 | -0.38135400 |
| H | 1.54967300  | 1.77881800  | -2.65307400 |
| H | 0.49526400  | 0.93424600  | -3.81877000 |
| H | 1.63409200  | 0.00368000  | -2.82491600 |

- computed data for *TS-Me*

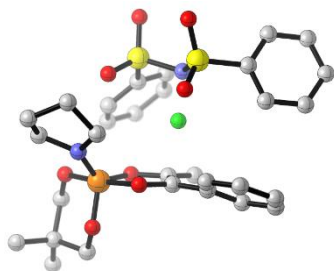

: total free energy = -3113.072060 Hartree

: relative free energy = 1.51 kcal/mol

: a single imaginary frequency at -769.45 cm<sup>-1</sup>

: Cartesian coordinates

| Atom | X           | Y           | Z           |
|------|-------------|-------------|-------------|
| C    | 3.01829500  | -0.59079400 | 2.68853300  |
| C    | 0.95517000  | 0.70273300  | 2.79679800  |
| N    | 2.12380000  | 0.33331600  | 1.94887300  |
| P    | 2.35274600  | 0.77359200  | 0.38585000  |
| O    | 3.26332500  | 2.08504600  | 0.07691500  |
| O    | 3.53475900  | -0.36860300 | 0.17833100  |
| C    | 4.17430900  | 2.10962800  | -1.03626300 |
| C    | 5.19812800  | 0.97906300  | -0.98390900 |
| H    | 4.66151700  | 3.08703200  | -0.98591300 |
| H    | 3.59333500  | 2.05452200  | -1.96723100 |
| C    | 4.41055500  | -0.32984500 | -0.94366100 |
| H    | 5.08508500  | -1.18577900 | -0.83277300 |
| H    | 3.83236500  | -0.45436200 | -1.86949400 |
| O    | 0.94492600  | 1.85607700  | 0.53469900  |
| O    | 1.64418700  | 0.24428400  | -1.04082100 |
| C    | 0.14799200  | 1.84841000  | -0.51682700 |
| C    | 0.49685600  | 0.86218500  | -1.42830600 |
| C    | -0.97496700 | 2.78003700  | -0.52164700 |
| C    | 0.01703400  | 0.50203800  | -2.78696900 |
| C    | -1.60429300 | 3.18877500  | -1.70693700 |
| C    | -2.68672900 | 4.06224700  | -1.65397100 |
| C    | -3.14516700 | 4.54040700  | -0.42500500 |
| C    | -2.50682200 | 4.15340700  | 0.75525500  |
| C    | -1.42421600 | 3.28137900  | 0.71005400  |
| H    | -1.23703700 | 2.85041100  | -2.66914500 |
| H    | -3.16820800 | 4.37578800  | -2.57474200 |
| H    | -3.99213800 | 5.21822400  | -0.38802200 |
| H    | -2.85905700 | 4.52510800  | 1.71185800  |
| H    | -0.93329800 | 2.95729500  | 1.62133600  |
| H    | 0.02089500  | 0.50291500  | 2.27405600  |
| H    | 1.00627500  | 1.76815900  | 3.04580600  |
| C    | 1.11161200  | -0.16342900 | 4.04680900  |
| C    | 2.62099900  | -0.37405500 | 4.14462000  |
| H    | 4.06432700  | -0.35987000 | 2.49147600  |
| H    | 2.82162900  | -1.62290900 | 2.37653300  |
| C    | 6.04478500  | 1.01932500  | -2.25630100 |
| C    | 6.08014500  | 1.11536700  | 0.25903900  |
| N    | -1.88169500 | -1.54712200 | 0.16349800  |
| F    | -0.90206000 | -0.24253200 | -0.42201300 |
| S    | -0.70076400 | -2.64626600 | 0.69036400  |
| S    | -2.89671400 | -0.80557500 | 1.30805800  |
| O    | -2.26859800 | 0.36923400  | 1.89479000  |
| O    | -3.39125600 | -1.86012500 | 2.18771800  |
| O    | 0.22273400  | -2.04772300 | 1.64656500  |
| O    | -1.40153900 | -3.87214700 | 1.06235000  |
| C    | 0.13445200  | -2.90108700 | -0.85397500 |
| C    | -4.19376400 | -0.28225400 | 0.21720600  |

|   |             |             |             |
|---|-------------|-------------|-------------|
| C | -4.15608400 | 1.00770400  | -0.30248500 |
| C | -5.17207700 | 1.39902900  | -1.17326400 |
| C | -5.20130900 | -1.19049000 | -0.10075700 |
| C | -6.20995000 | -0.78252400 | -0.96890500 |
| C | -6.19243300 | 0.50753500  | -1.50402300 |
| H | -6.98168200 | 0.81956900  | -2.18036400 |
| H | -5.16370700 | 2.40189800  | -1.58753700 |
| H | -5.19480300 | -2.18651000 | 0.33013000  |
| H | -7.00887400 | -1.46961500 | -1.22601300 |
| H | -3.35544800 | 1.68496500  | -0.02246800 |
| C | 1.50962600  | -2.71052700 | -0.90430300 |
| C | 2.17131100  | -2.99096500 | -2.10106400 |
| C | 1.45577000  | -3.43183900 | -3.21180800 |
| C | 0.06990000  | -3.60625600 | -3.14074500 |
| C | -0.60263300 | -3.34745500 | -1.95182100 |
| H | 2.04738200  | -2.34012200 | -0.03698500 |
| H | 3.24662700  | -2.86084600 | -2.16158800 |
| H | 1.97690300  | -3.64317400 | -4.14003200 |
| H | -0.48312500 | -3.94845300 | -4.00884900 |
| H | -1.67660700 | -3.48327200 | -1.87353500 |
| H | 5.42478100  | 0.92320800  | -3.15407500 |
| H | 6.77255100  | 0.20143400  | -2.25519200 |
| H | 6.59859700  | 1.96134700  | -2.32237700 |
| H | 6.79474400  | 0.28735200  | 0.31189200  |
| H | 6.64424600  | 2.05335800  | 0.22577300  |
| H | 5.47949700  | 1.10955700  | 1.17258000  |
| H | 0.60933200  | -1.12214000 | 3.89195300  |
| H | 0.68054700  | 0.32061800  | 4.92615600  |
| H | 3.10871500  | 0.52737900  | 4.53287900  |
| H | 2.90563500  | -1.22011500 | 4.77434600  |
| H | 0.18770600  | -0.56994100 | -2.92834300 |
| H | 0.56637300  | 1.04854200  | -3.56102400 |
| H | -1.05010000 | 0.69859300  | -2.88863500 |

#### 4. X-ray Crystallographic Data

Reflection data for **4a** were collected using a Bruker APEX-II CCD-based diffractometer with graphite-monochromated MoK $\alpha$  radiation ( $\lambda = 0.7107 \text{ \AA}$ ). The hemisphere of the reflection data was collected as  $\omega$  scan frames at  $0.5^\circ/\text{frame}$  and an exposure time of  $5 \text{ s/frame}$ . The cell parameters were determined and refined using the APEX2 program.<sup>12</sup> The data were corrected for Lorentz and polarization effects, and an empirical absorption correction was applied using the SADABS program.<sup>13</sup> The compound structure was solved by direct methods and refined by full matrix least-squares using the SHELXTL program package<sup>14</sup> and Olex2<sup>15</sup> with anisotropic thermal parameters for all non-hydrogen atoms. The relevant data are summarized in Table S1. CCDC 2110574 contains the supplementary crystallographic data for this study. These data can be obtained free of charge from The Cambridge Crystallographic Data Centre via [www.ccdc.cam.ac.uk/data\\_request/cif](http://www.ccdc.cam.ac.uk/data_request/cif).

**Table S1.** Crystallographic data and parameters for **4a**.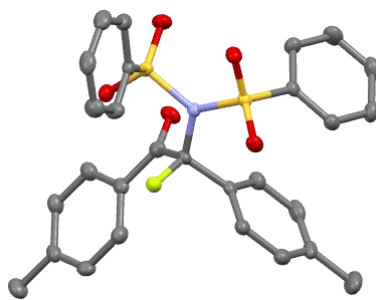

|                                                     |                                                                                            |
|-----------------------------------------------------|--------------------------------------------------------------------------------------------|
| Identification code                                 | JWJ05_0m                                                                                   |
| CCDC #                                              | 2110574                                                                                    |
| Empirical formula                                   | C <sub>28</sub> H <sub>24</sub> FNO <sub>5</sub> S <sub>2</sub>                            |
| Formula weight                                      | 537.60                                                                                     |
| Temperature/K                                       | 100                                                                                        |
| Crystal system                                      | orthorhombic                                                                               |
| Space group                                         | <i>P</i> 2 <sub>1</sub> 2 <sub>1</sub> 2 <sub>1</sub>                                      |
| <i>a</i> /Å                                         | 6.7215(2)                                                                                  |
| <i>b</i> /Å                                         | 18.6021(5)                                                                                 |
| <i>c</i> /Å                                         | 20.0805(5)                                                                                 |
| $\alpha$ /°                                         | 90                                                                                         |
| $\beta$ /°                                          | 90                                                                                         |
| $\gamma$ /°                                         | 90                                                                                         |
| Volume/Å <sup>3</sup>                               | 2510.75(12)                                                                                |
| <i>Z</i>                                            | 4                                                                                          |
| $\rho_{\text{calc}}$ /cm <sup>3</sup>               | 1.422                                                                                      |
| $\mu$ /mm <sup>-1</sup>                             | 0.260                                                                                      |
| <i>F</i> (000)                                      | 1120.0                                                                                     |
| 2 $\theta$ range for data collection/°              | 7.618 to 51.904                                                                            |
| Index ranges                                        | -8 ≤ <i>h</i> ≤ 8, -22 ≤ <i>k</i> ≤ 22, -24 ≤ <i>l</i> ≤ 24                                |
| Reflections collected                               | 31857                                                                                      |
| Independent reflections                             | 4877 [ <i>R</i> <sub>int</sub> = 0.0439, <i>R</i> <sub>sigma</sub> = 0.0283]               |
| Data/restraints/parameters                          | 4877/0/336                                                                                 |
| Goodness-of-fit on <i>F</i> <sup>2</sup>            | 1.130                                                                                      |
| Final <i>R</i> indexes [ <i>I</i> ≥ 2σ( <i>I</i> )] | <sup>a</sup> <i>R</i> <sub>1</sub> = 0.0342, <sup>b</sup> w <i>R</i> <sub>2</sub> = 0.0794 |
| Final <i>R</i> indexes [all data]                   | <sup>a</sup> <i>R</i> <sub>1</sub> = 0.0399, <sup>b</sup> w <i>R</i> <sub>2</sub> = 0.0820 |
| Largest diff. peak/hole / e Å <sup>-3</sup>         | 0.34/-0.31                                                                                 |
| Flack parameter                                     | 0.49(2)                                                                                    |

$$^a R_1 = \frac{\sum ||F_o| - |F_c||}{\sum |F_o|}, \quad ^b wR_2 = \left\{ \frac{\sum w(F_o^2 - F_c^2)^2}{\sum w(F_o^2)^2} \right\}^{1/2}.$$

## 5. References

1. (a) G. Choi, H. E. Kim, S. Hwang, H. Jang and W.-j. Chung, *Org. Lett.*, 2020, **22**, 4190–4195; (b) L. E. Harrington, J. F. Britten, D. W. Hughes, A. D. Bain, J.-Y. Thépot and M. J. McGlimchey, *J. Organomet. Chem.*, 2002, **656**, 243–257; (c) S. R. Reddy, S. Stella and A. Chadha, *Synth. Commun.*, 2012, **42**, 3493–3503.
2. W. Ren, Y. Xia, S.-J. Ji, Y. Zhang, X. Wan and J. Zhao, *Org. Lett.*, 2009, **11**, 1841–1844.
3. C. A. Busacca, E. Farber, J. DeYoung, S. Campbell, N. C. Gonnella, N. Grinberg, N. Haddad, H. Lee, S. Ma, D. Reeves, S. Shen, and C. H. Senanayake *Org. Lett.*, 2009, **11**, 5594–5597.
4. C.-L. Chang, M. P. Kumar and R.-S. Liu, *J. Org. Chem.*, 2004, **69**, 2793–2796.
5. Molecular Orbital PACkage 2016, <http://openmopac.net/>, J. J. P. Stewart, Stewart Computational Chemistry, Colorado Springs, CO, USA.
6. (a) Y. Zhao and D. G. Truhlar, *Theor. Chem. Acc.*, 2008, **120**, 215–241; (b) Y. Zhao and D. G. Truhlar, *Acc. Chem. Res.*, 2008, **41**, 157–167.
7. (a) S. Grimme, J. Antony, S. Ehrlich and H. Krieg, *J. Chem. Phys.*, 2010, **132**, 154104. (b) R. Peverati and K. K. Baldridge, *J. Chem. Theory Comput.*, 2008, **4**, 2030–2048.
8. Gaussian 16, Revision C.01, M. J. Frisch, G. W. Trucks, H. B. Schlegel, G. E. Scuseria, M. A. Robb, J. R. Cheeseman, G. Scalmani, V. Barone, G. A. Petersson, H. Nakatsuji, X. Li, M. Caricato, A. V. Marenich, J. Bloino, B. G. Janesko, R. Gomperts, B. Mennucci, H. P. Hratchian,; J. V. Ortiz,; A. F. Izmaylov, J. L. Sonnenberg, D. Williams-Young, F. Ding, F. Lipparini, F. Egidi, J. Goings, B. Peng, A. Petrone, T. Henderson, D. Ranasinghe, V. G. Zakrzewski, J. Gao, N. Rega, G. Zheng, W. Liang, M. Hada, M. Ehara, K. Toyota, R. Fukuda, J. Hasegawa, M. Ishida, T. Nakajima, Y. Honda, O. Kitao, H. Nakai, T. Vreven, K. Throssell, J. A. Montgomery, Jr., J. E. Peralta, F. Ogliaro, M. J. Bearpark, J. J. Heyd, E. N. Brothers, K. N. Kudin, V. N. Staroverov, T. A. Keith, R. Kobayashi, J. Normand, K. Raghavachari, A. P. Rendell, J. C. Burant, S. S. Iyengar, J. Tomasi, M. Cossi, J. M. Millam, M. Klene, C. Adamo, R. Cammi, J. W. Ochterski, R. L. Martin, K. Morokuma, O. Farkas, J. B. Foresman, and D. J. Fox, Gaussian, Inc., Wallingford CT, 2019.
9. (a) S. Miertuš, E. Scrocco and J. Tomasi, *Chem. Phys.*, 1981, **55**, 117–129; (b) J. L. Pascual-Ahuir, E. Silla and I. Tuñón, *J. Comput. Chem.*, 1994, **15**, 1127–1138; (c) V. Barone and M. Cossi, *J. Phys. Chem. A*, 1998, **102**, 1995–2001.
10. (a) A. Schäfer, H. Horn and R. Ahlrichs, *J. Chem. Phys.*, 1992, **97**, 2571–2577; (b) A. Schäfer, C. Huber and R. Ahlrichs, *J. Chem. Phys.*, 1994, **100**, 5829–5835; (c) F. Weigend, F. Furche and R. Ahlrichs, *J. Chem. Phys.*, 2003, **119**, 12753–12762; (d) F. Weigend and R. Ahlrichs, *Phys. Chem. Chem. Phys.*, 2005, **7**, 3297–3305.
11. C. Y. Legault, CYLview 1.0b, Université de Sherbrooke, 2009 (<http://www.cylview.org>)
12. Bruker-AXS (2014). APEX2. Version 2014.11-0. Madison, Wisconsin, USA.
13. L. Krause, R. Herbst-Irmer, G. M. Sheldrick and D. Stalke, *J. Appl. Cryst.*, 2015, **48**, 3–10.
14. G. Sheldrick, *Acta Cryst. C*, 2015, **71**, 3–8.
15. O. V. Dolomanov, L. J. Bourhis, R. J. Gildea, J. A. K. Howard and H. Puschmann, *J. Appl. Crystallogr.*, 2009, **42**, 339–341.



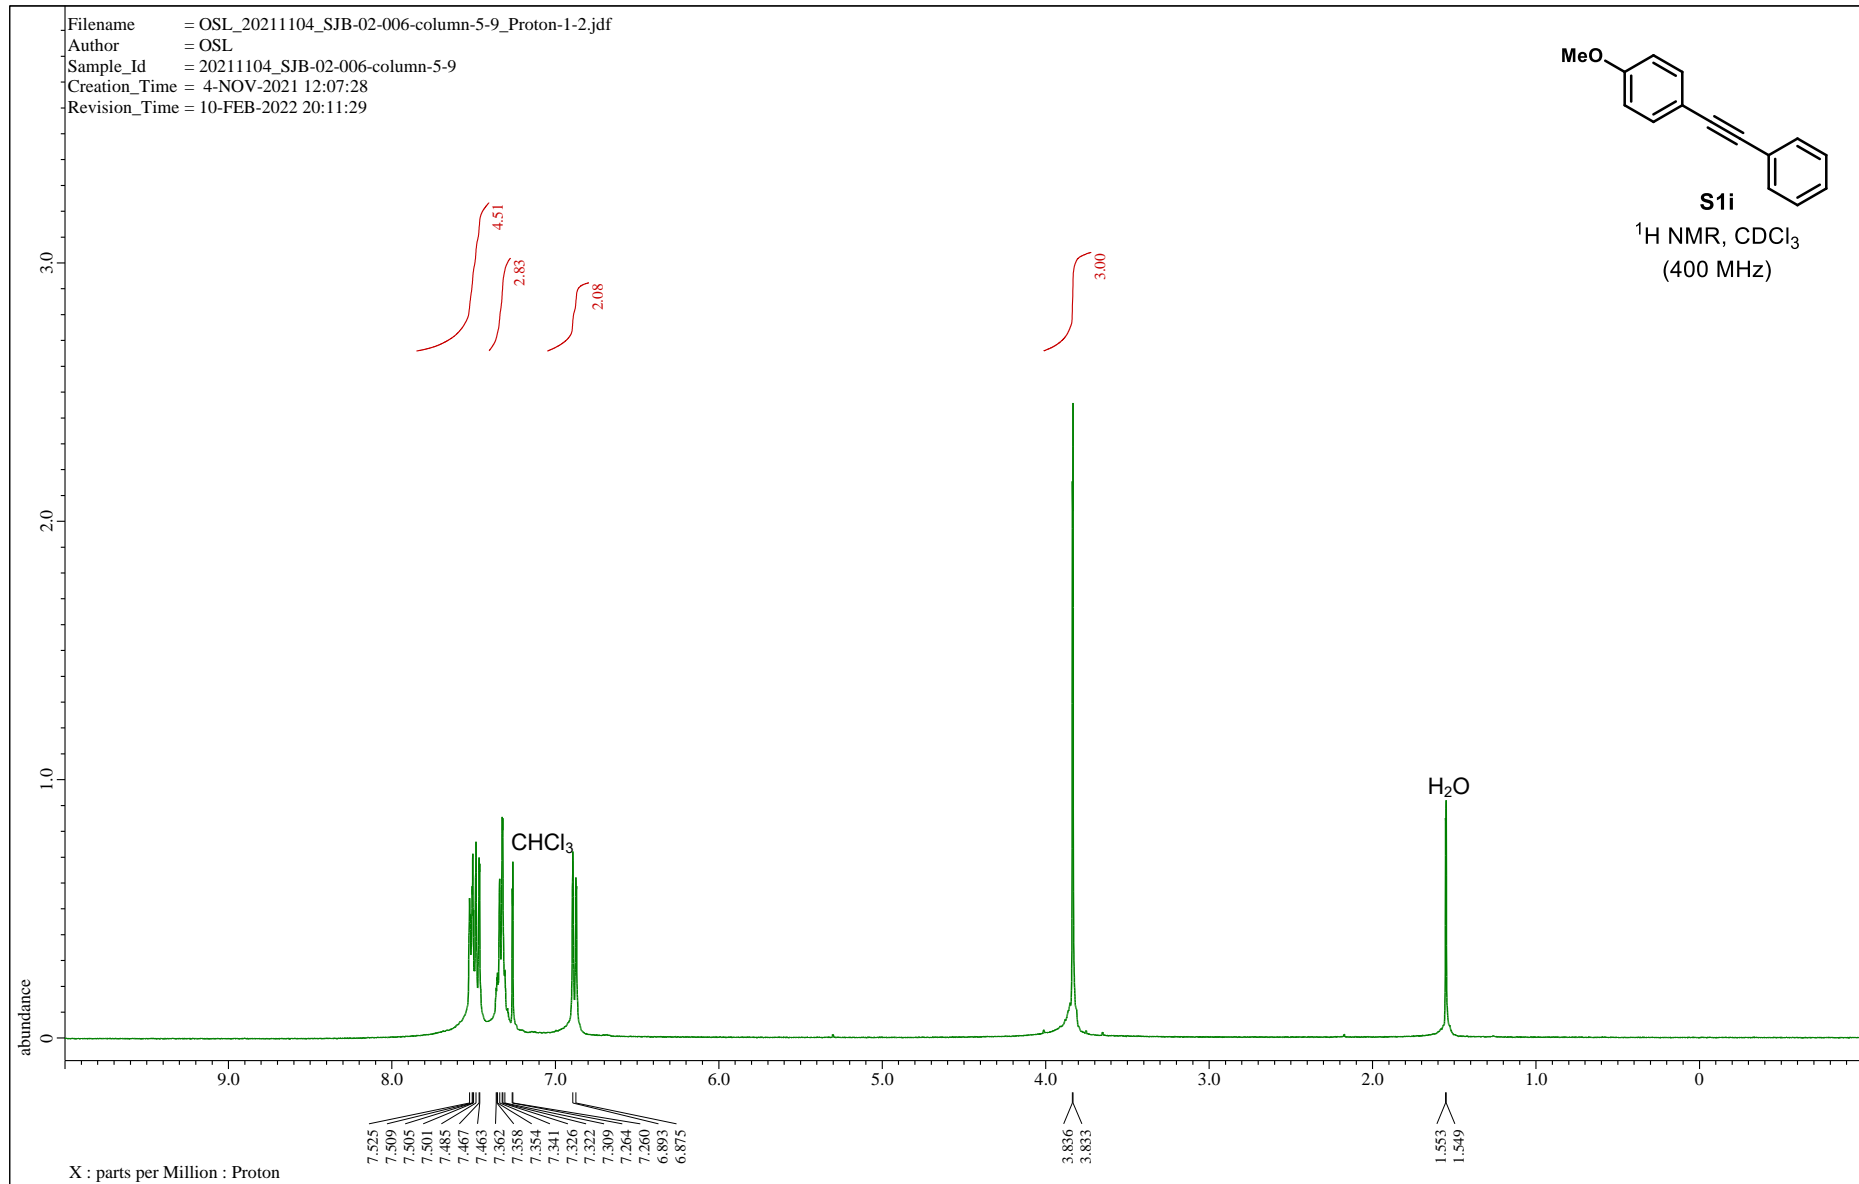

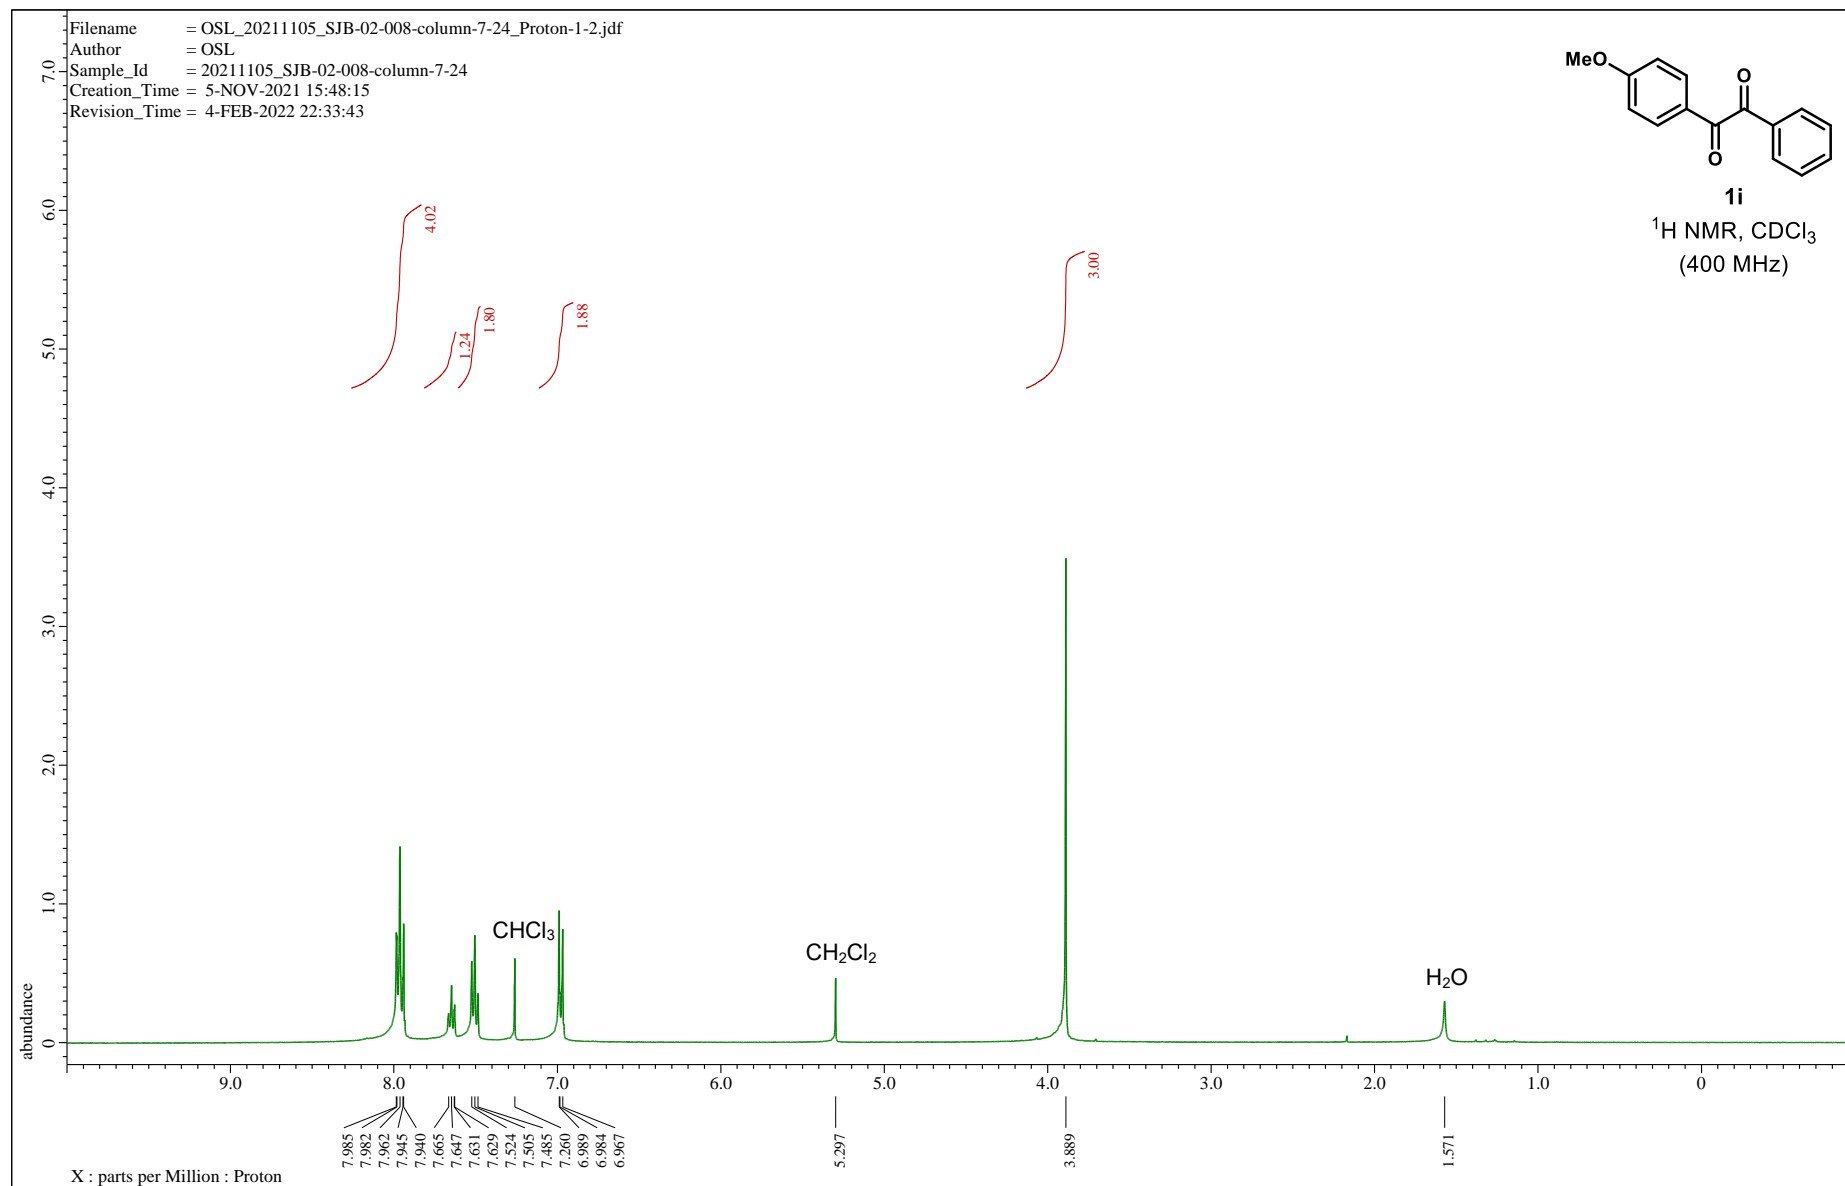

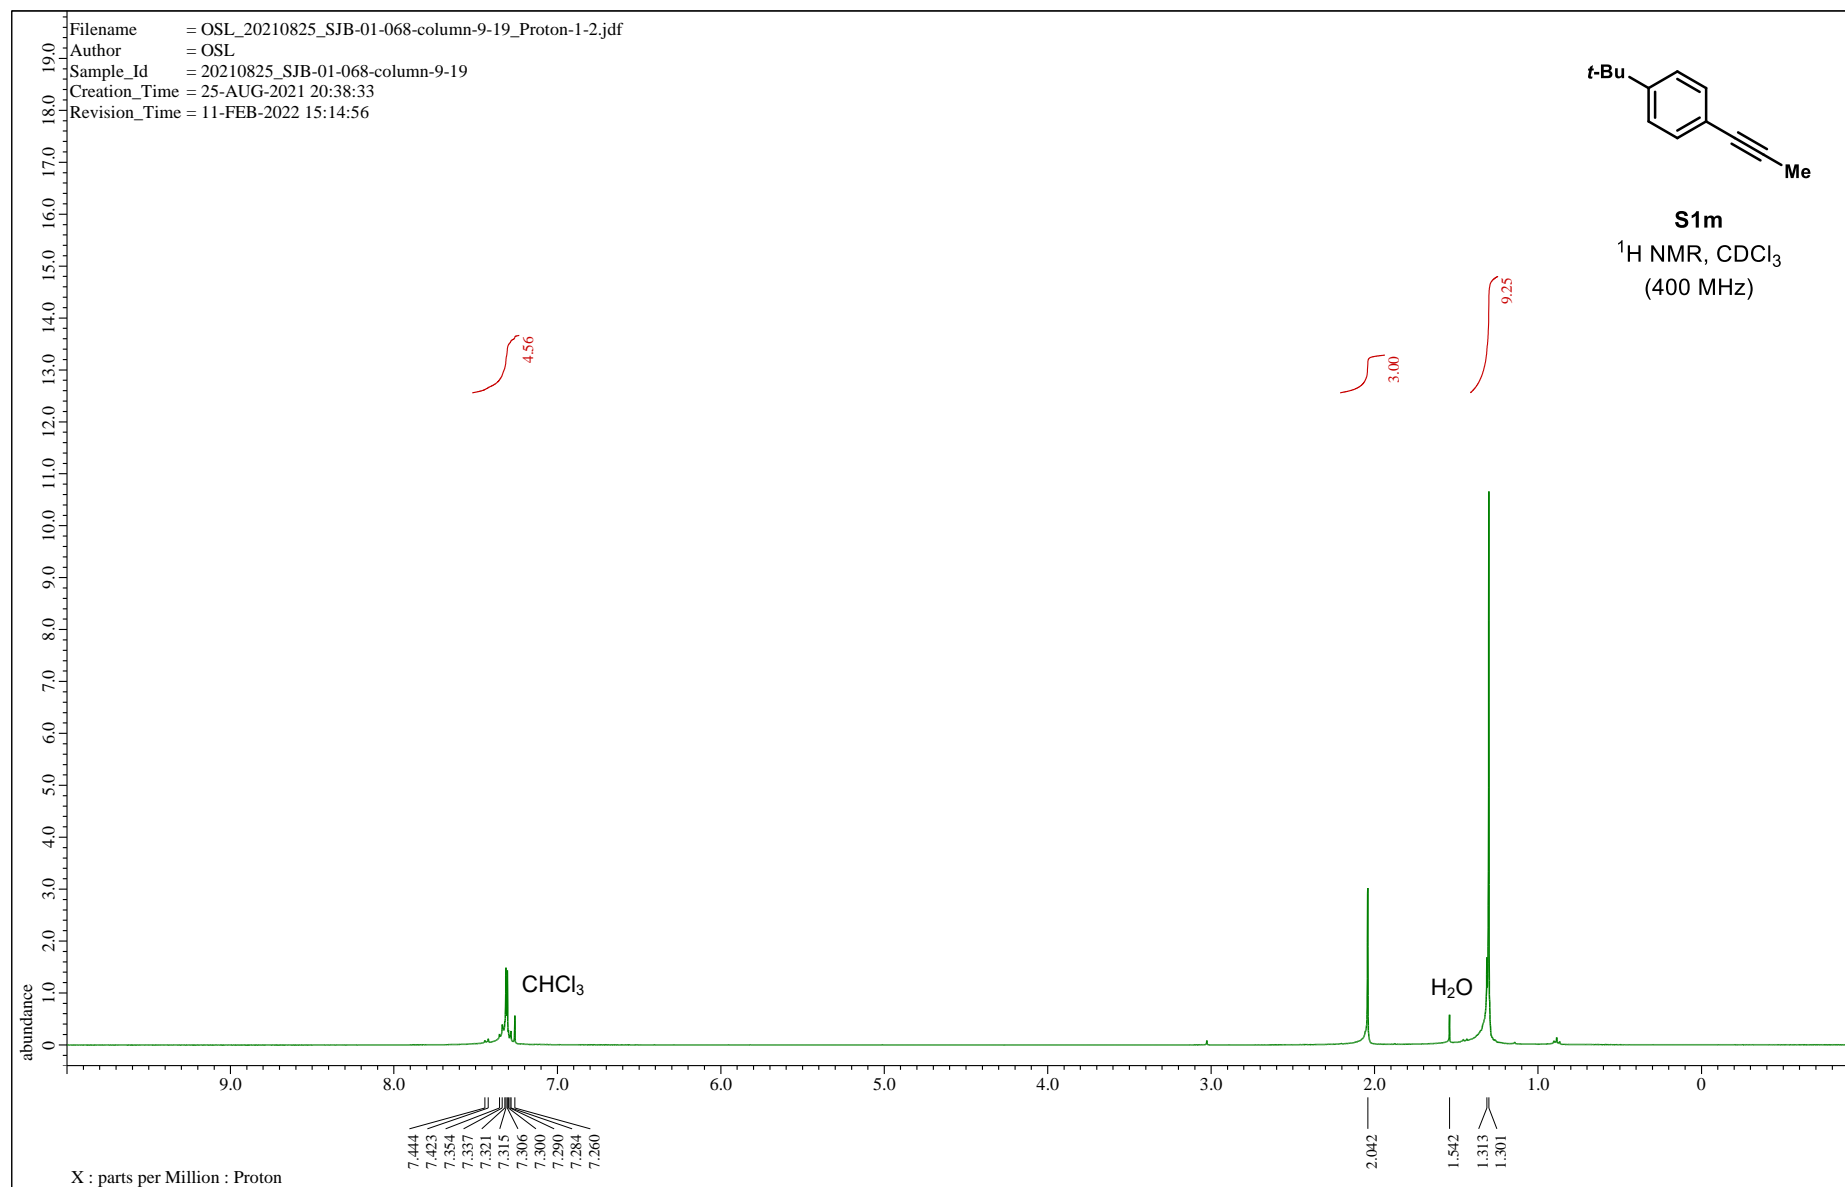

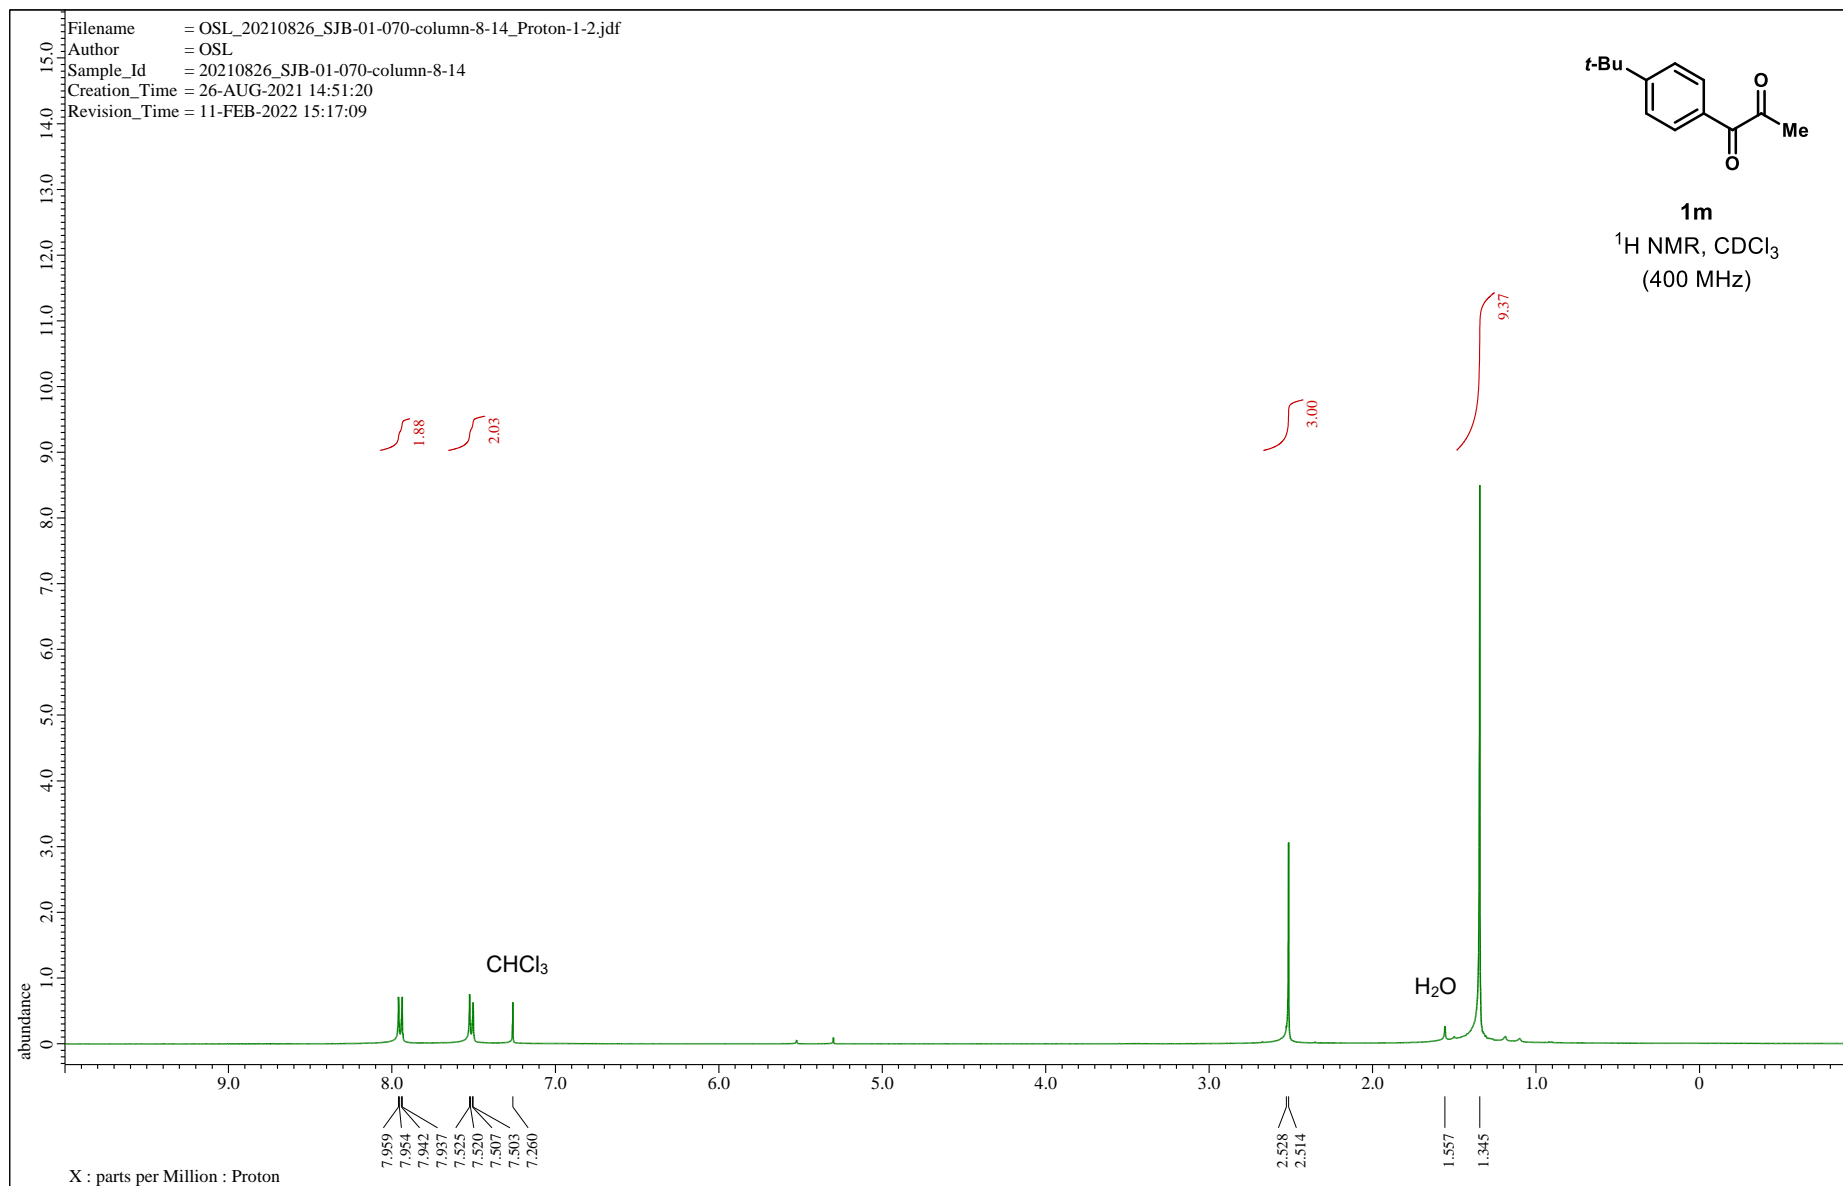

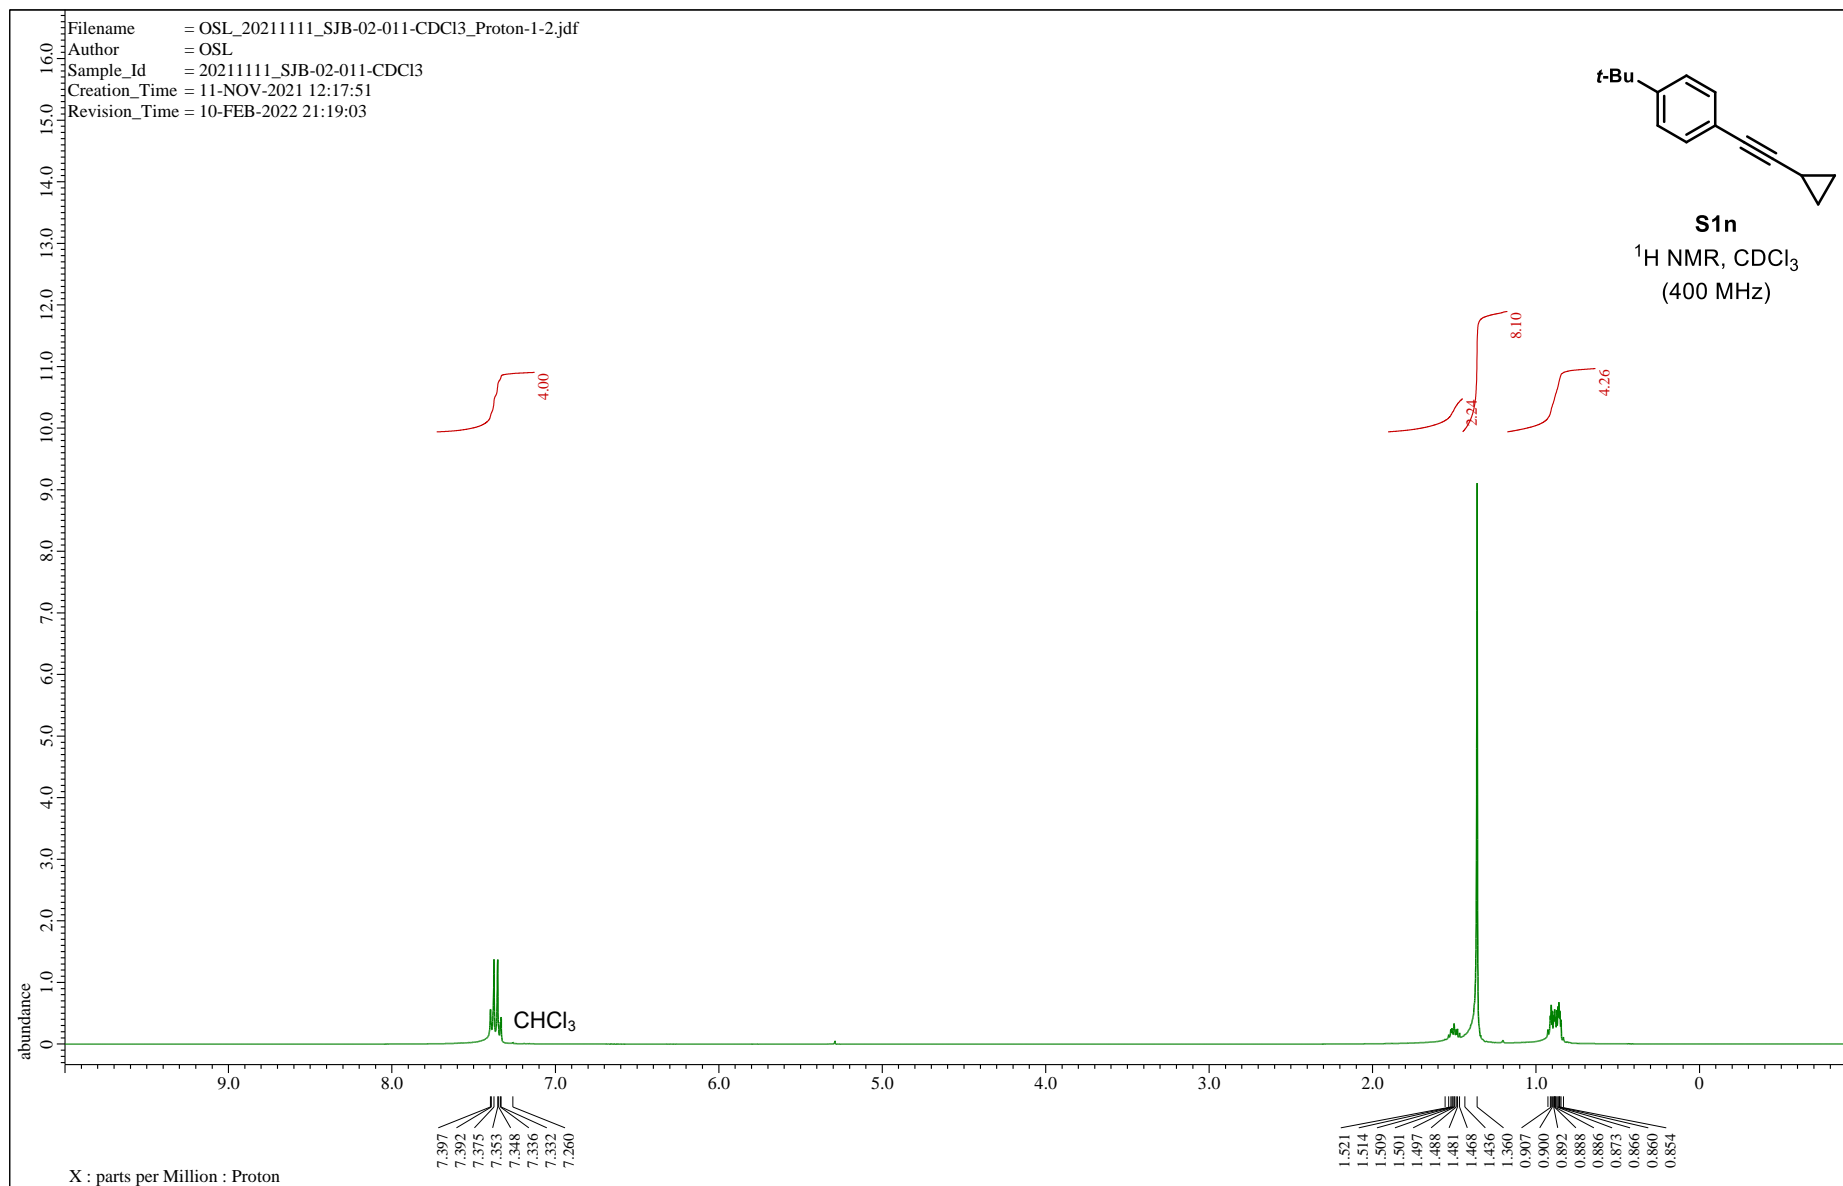

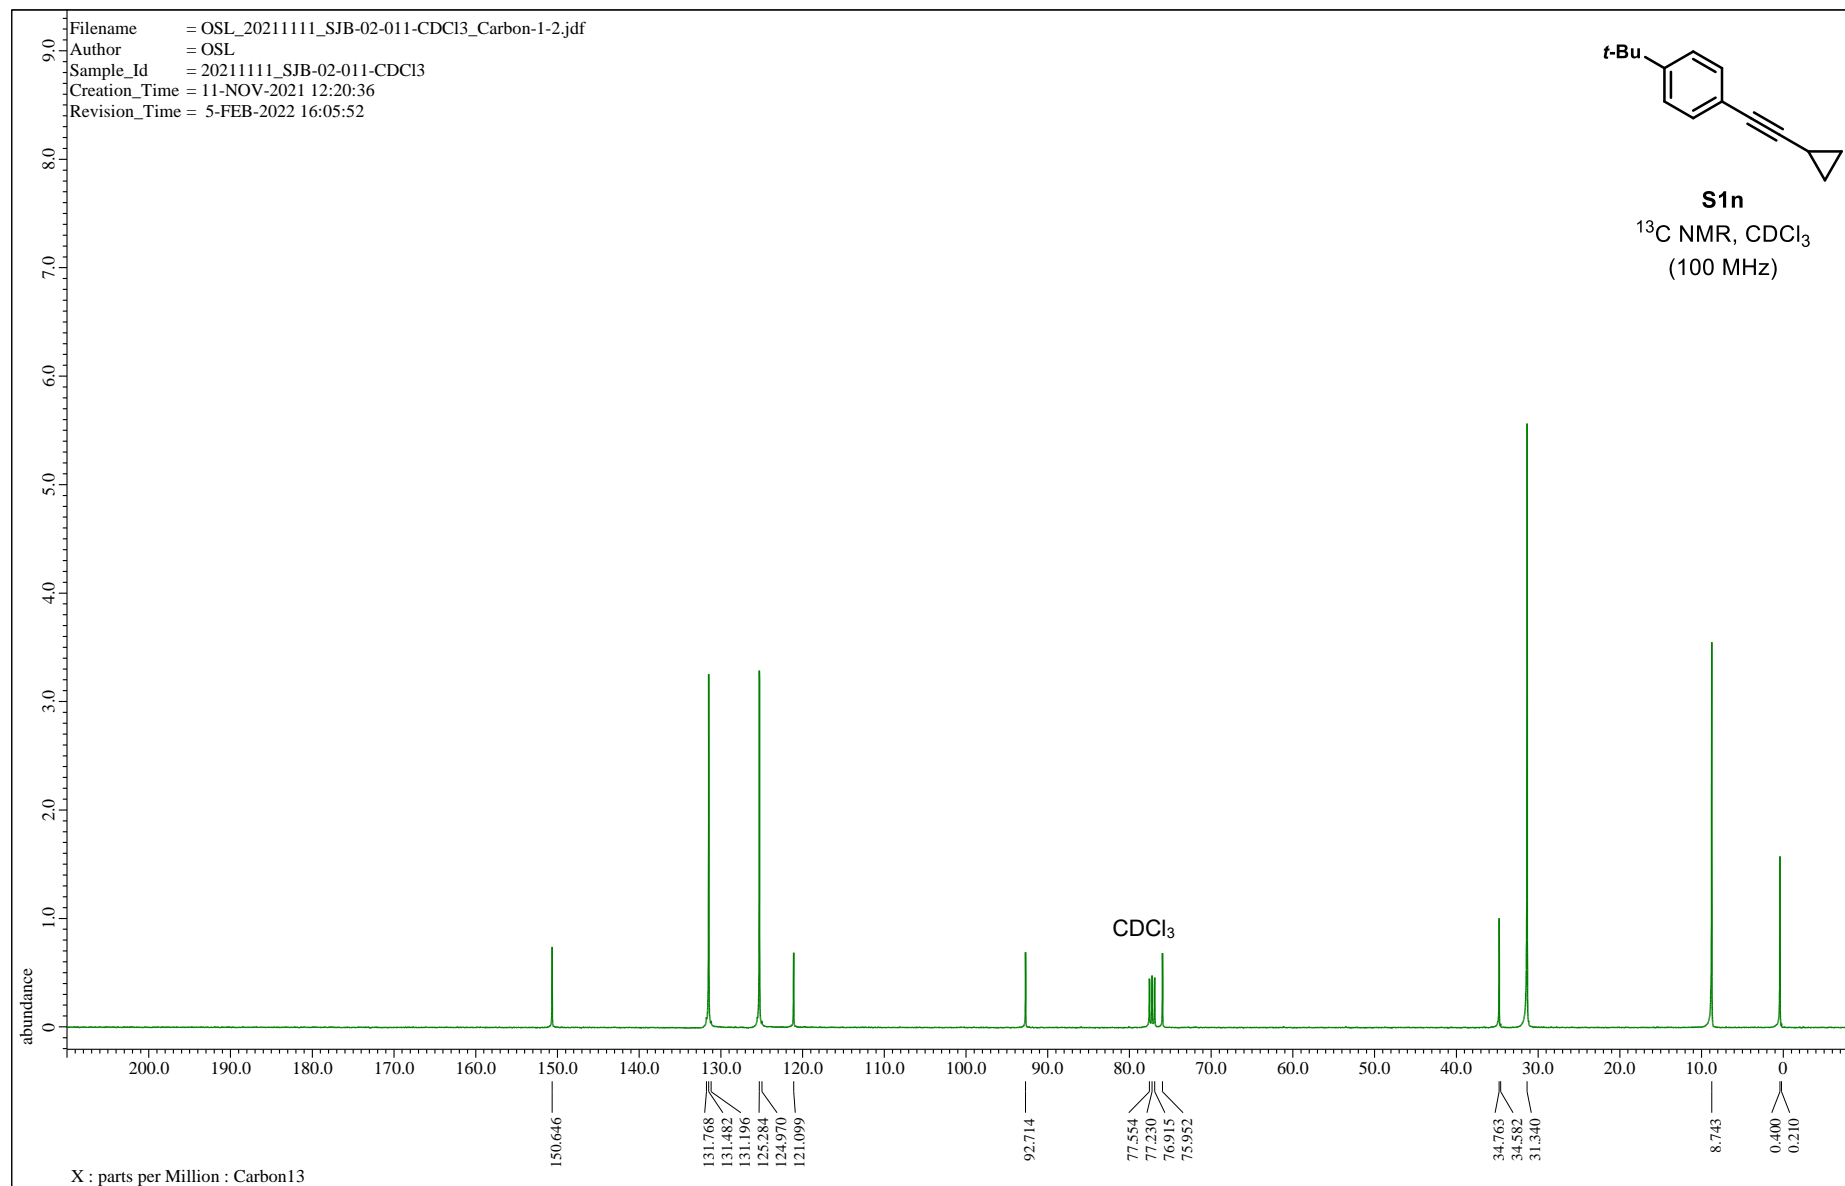

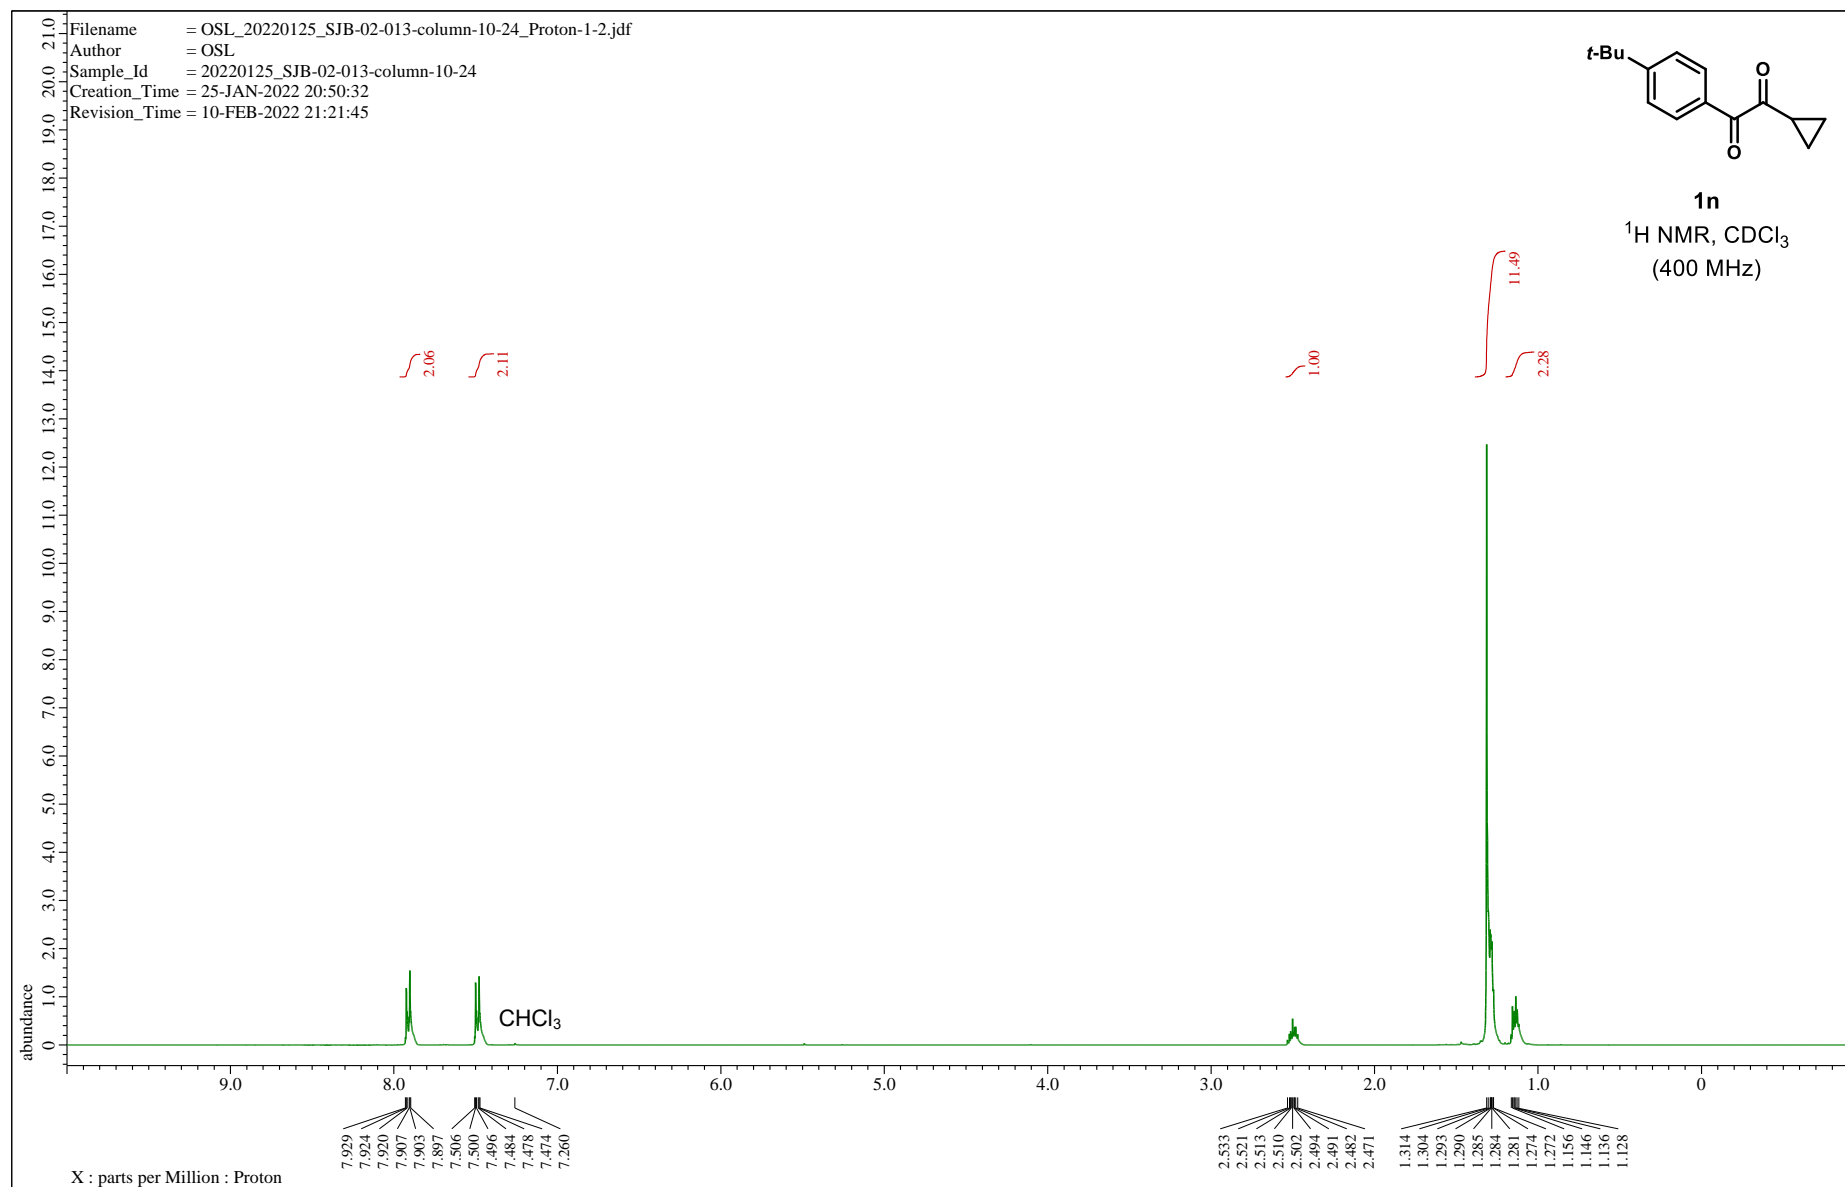

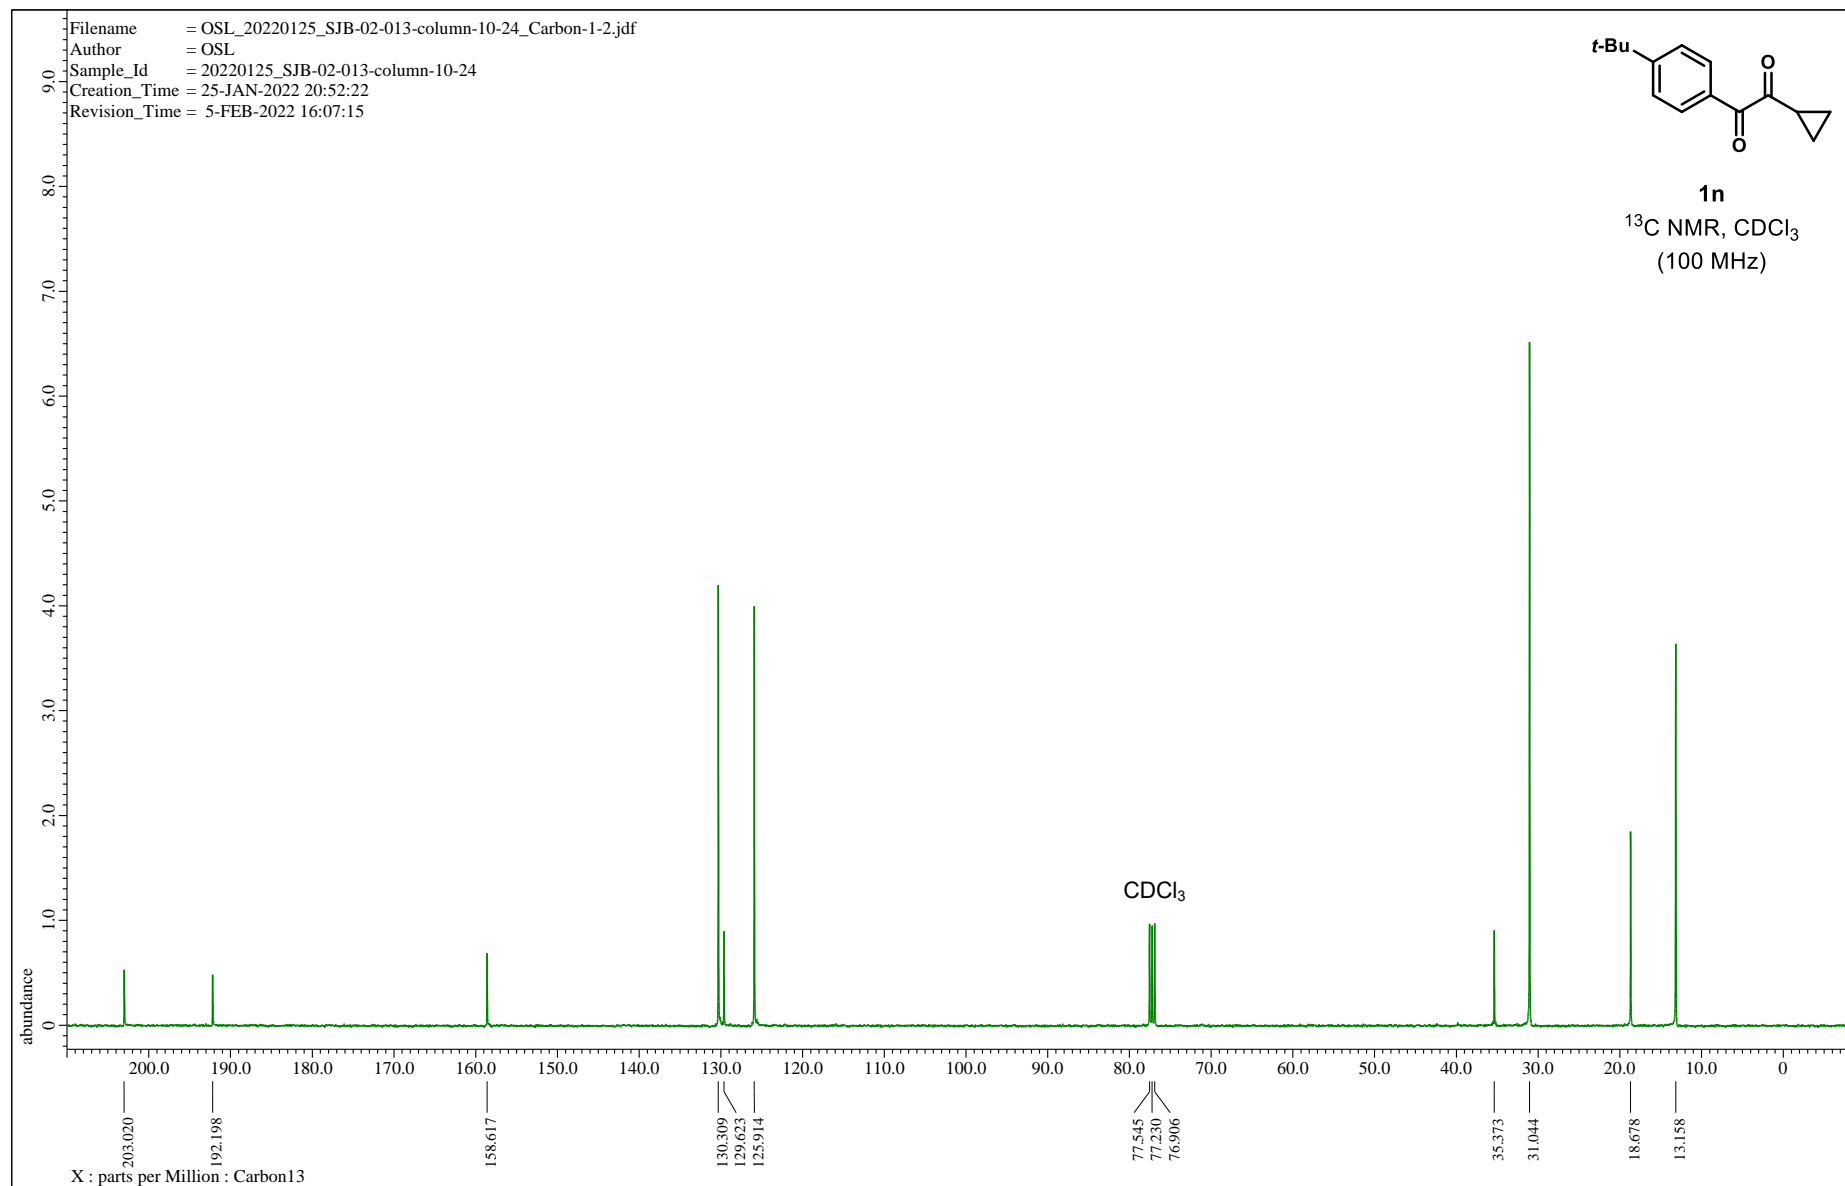



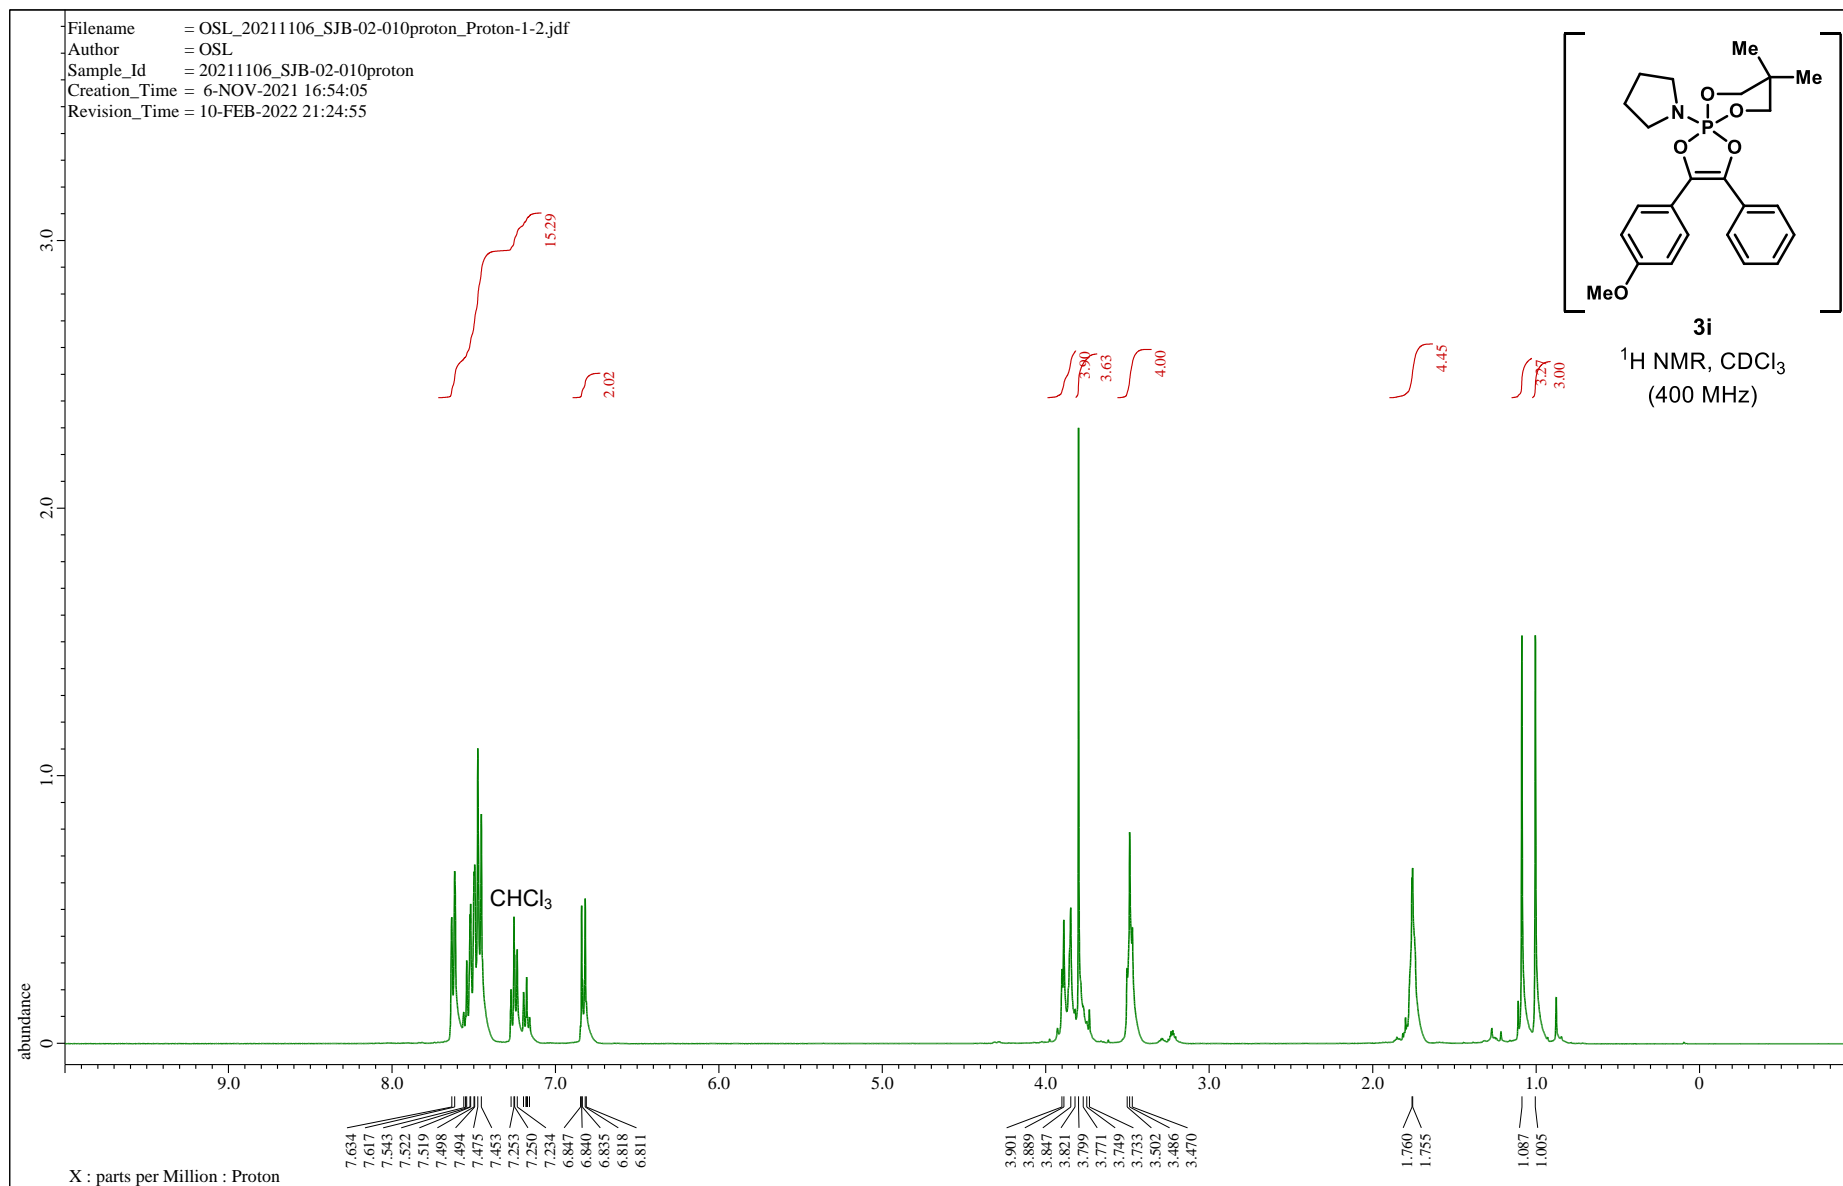

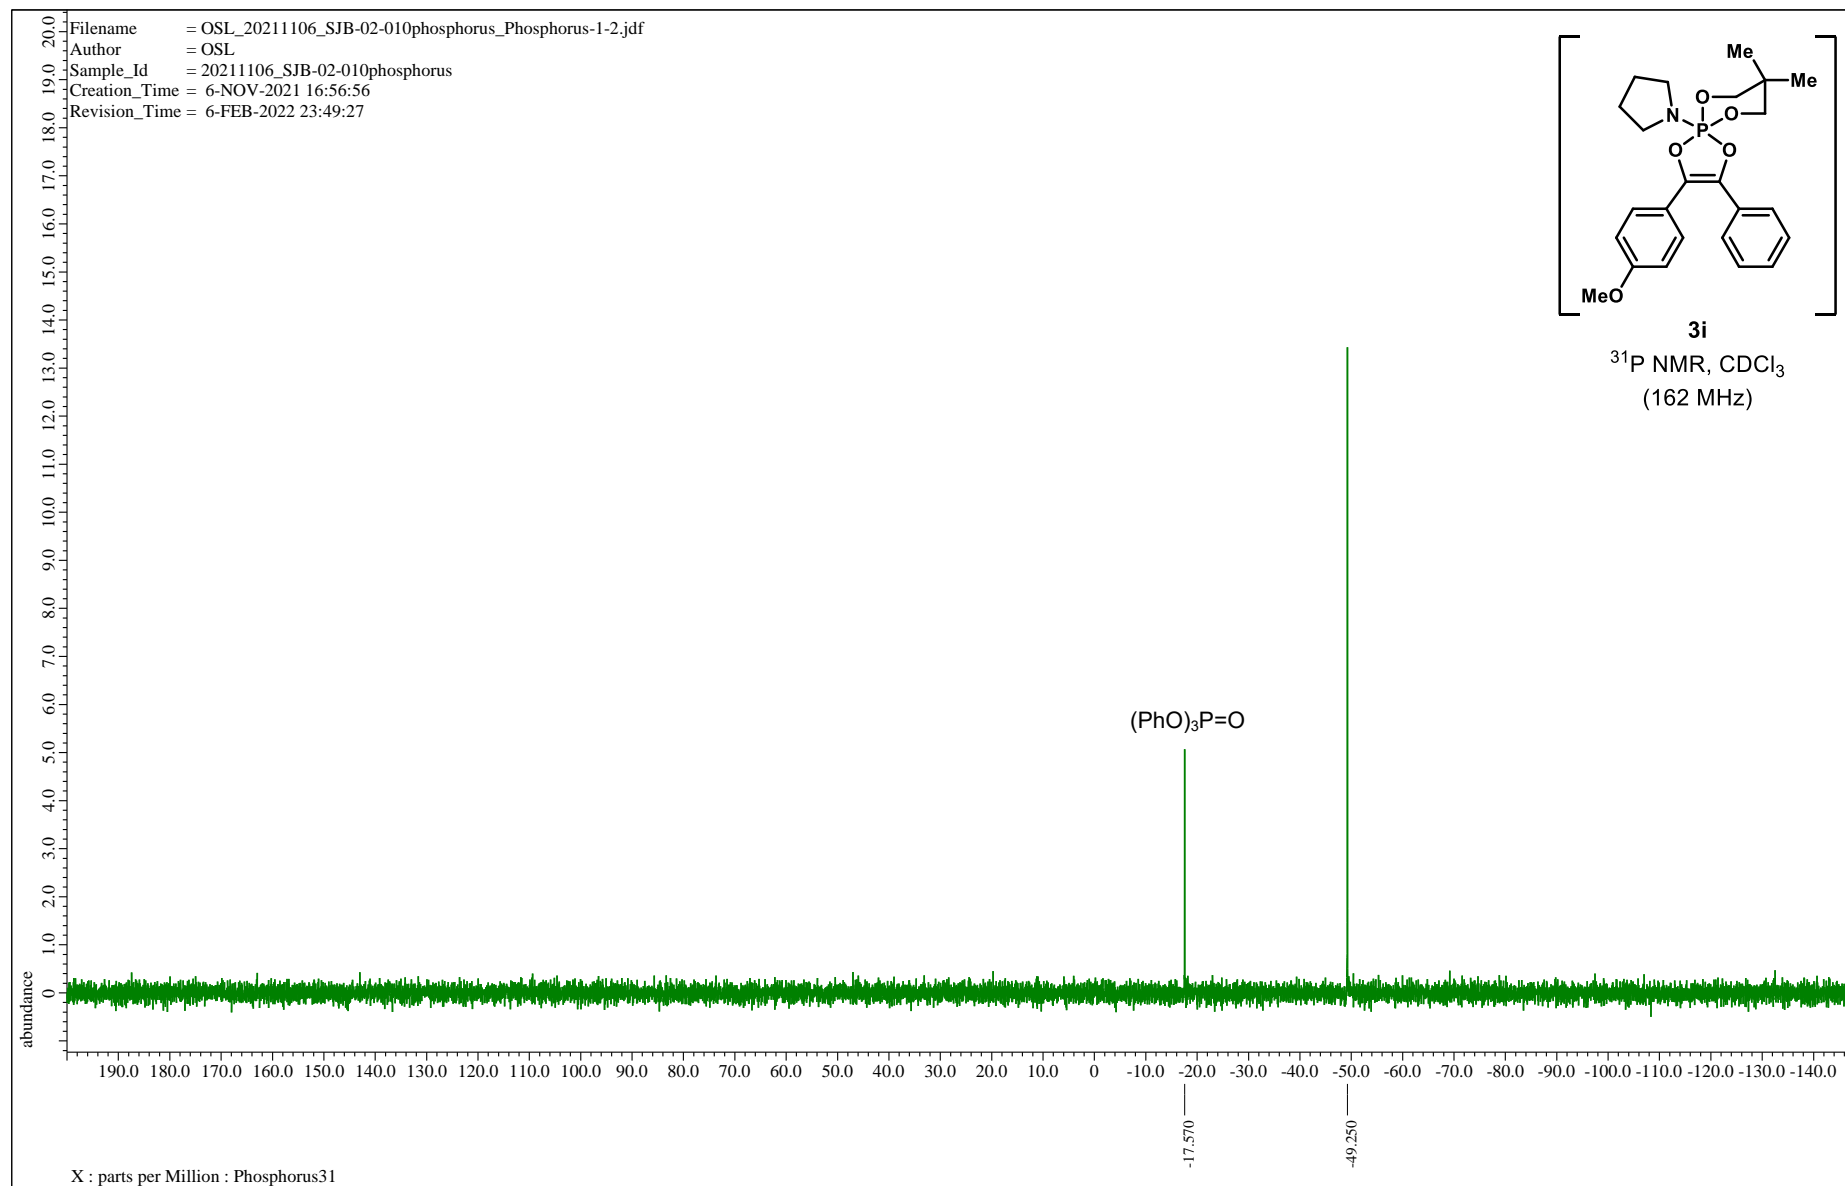

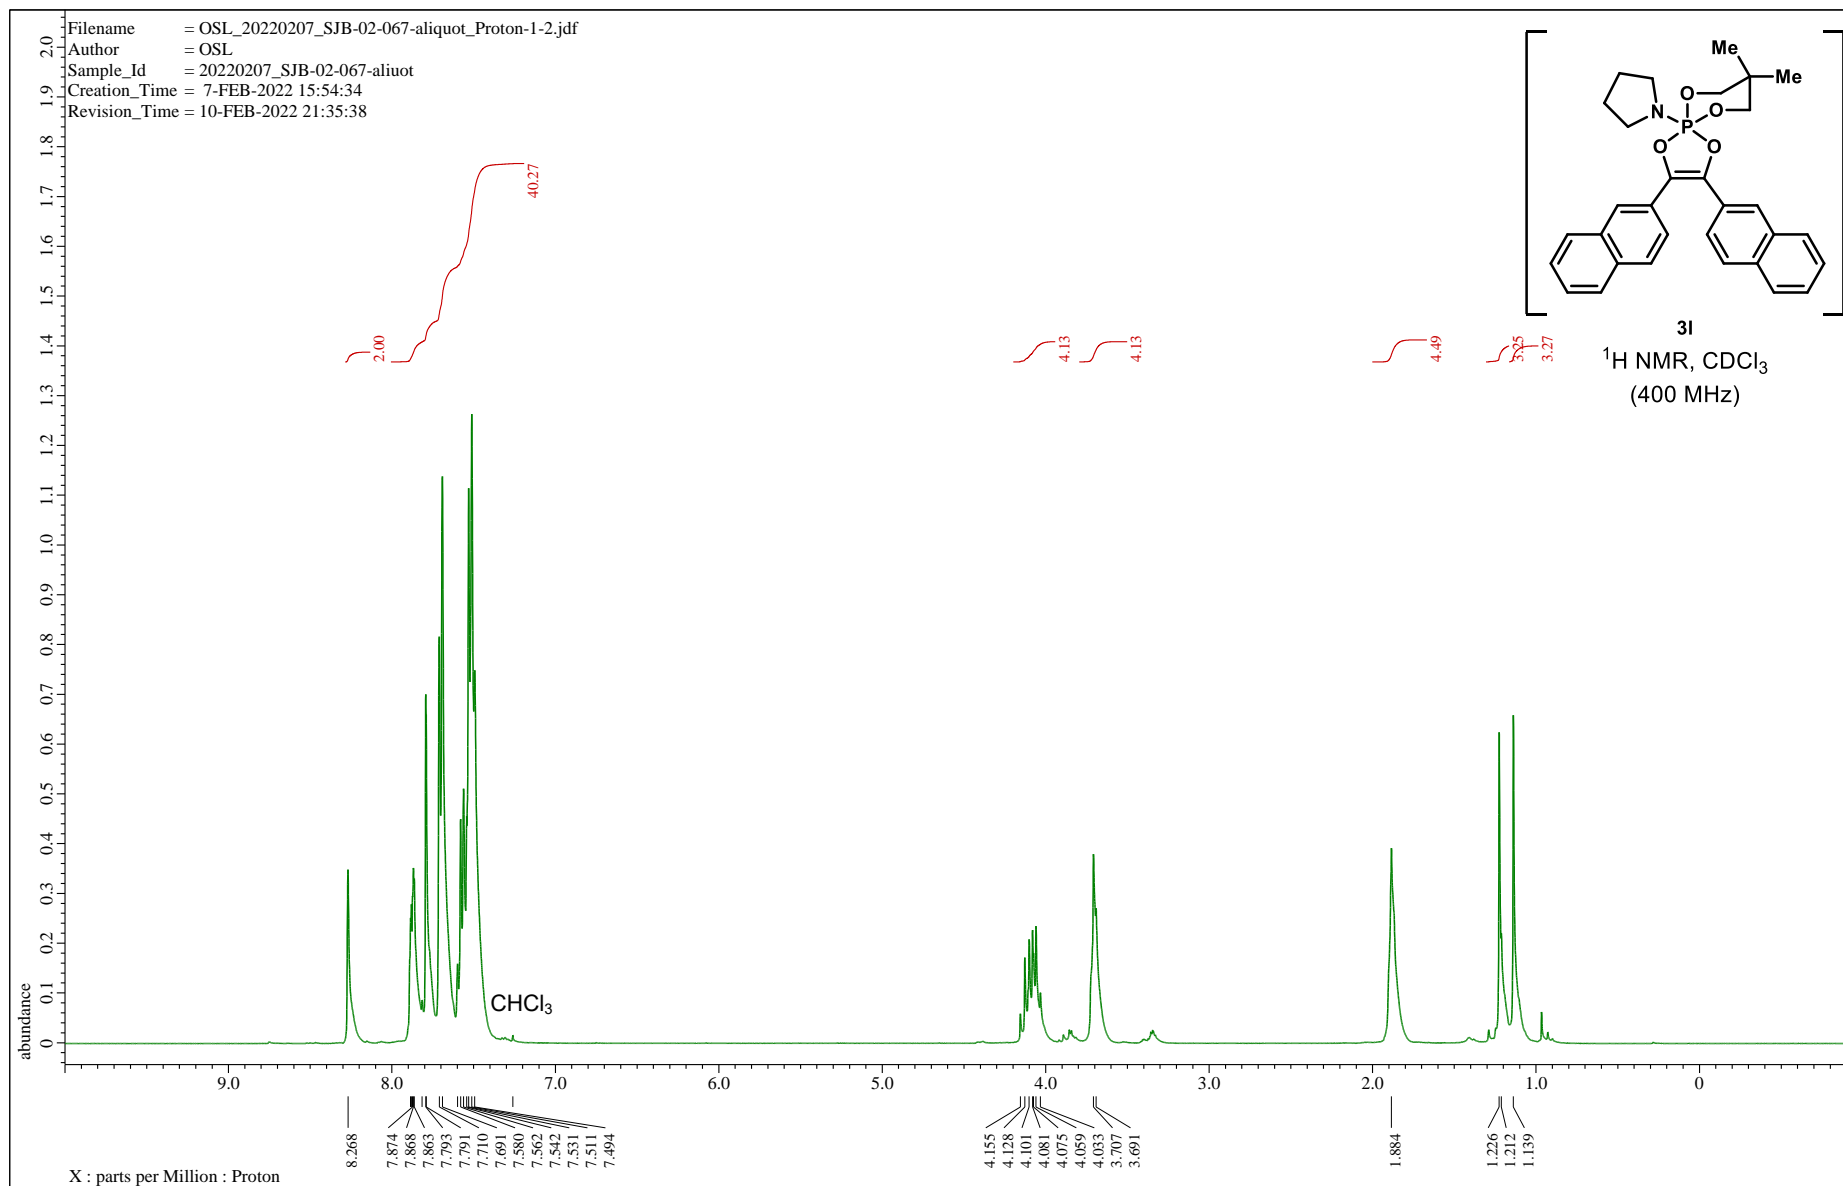

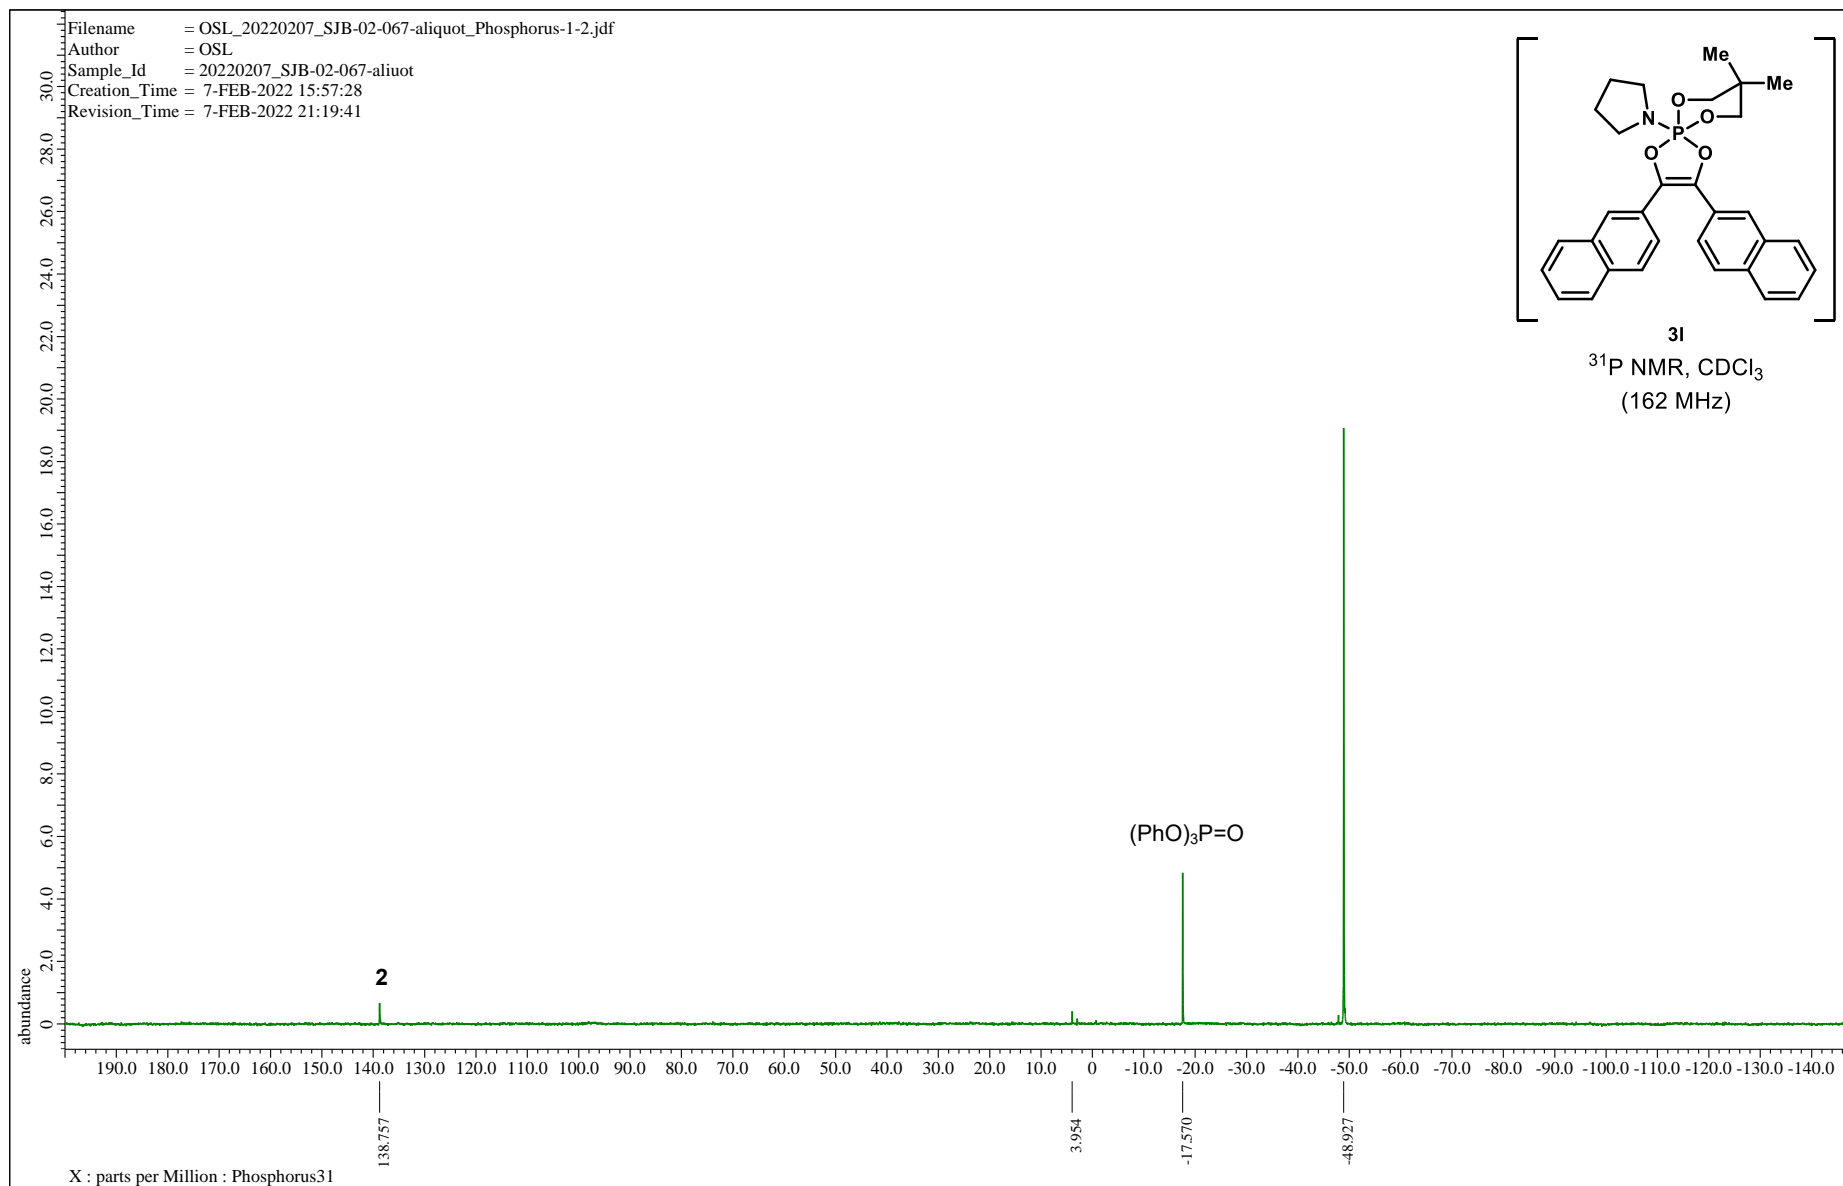

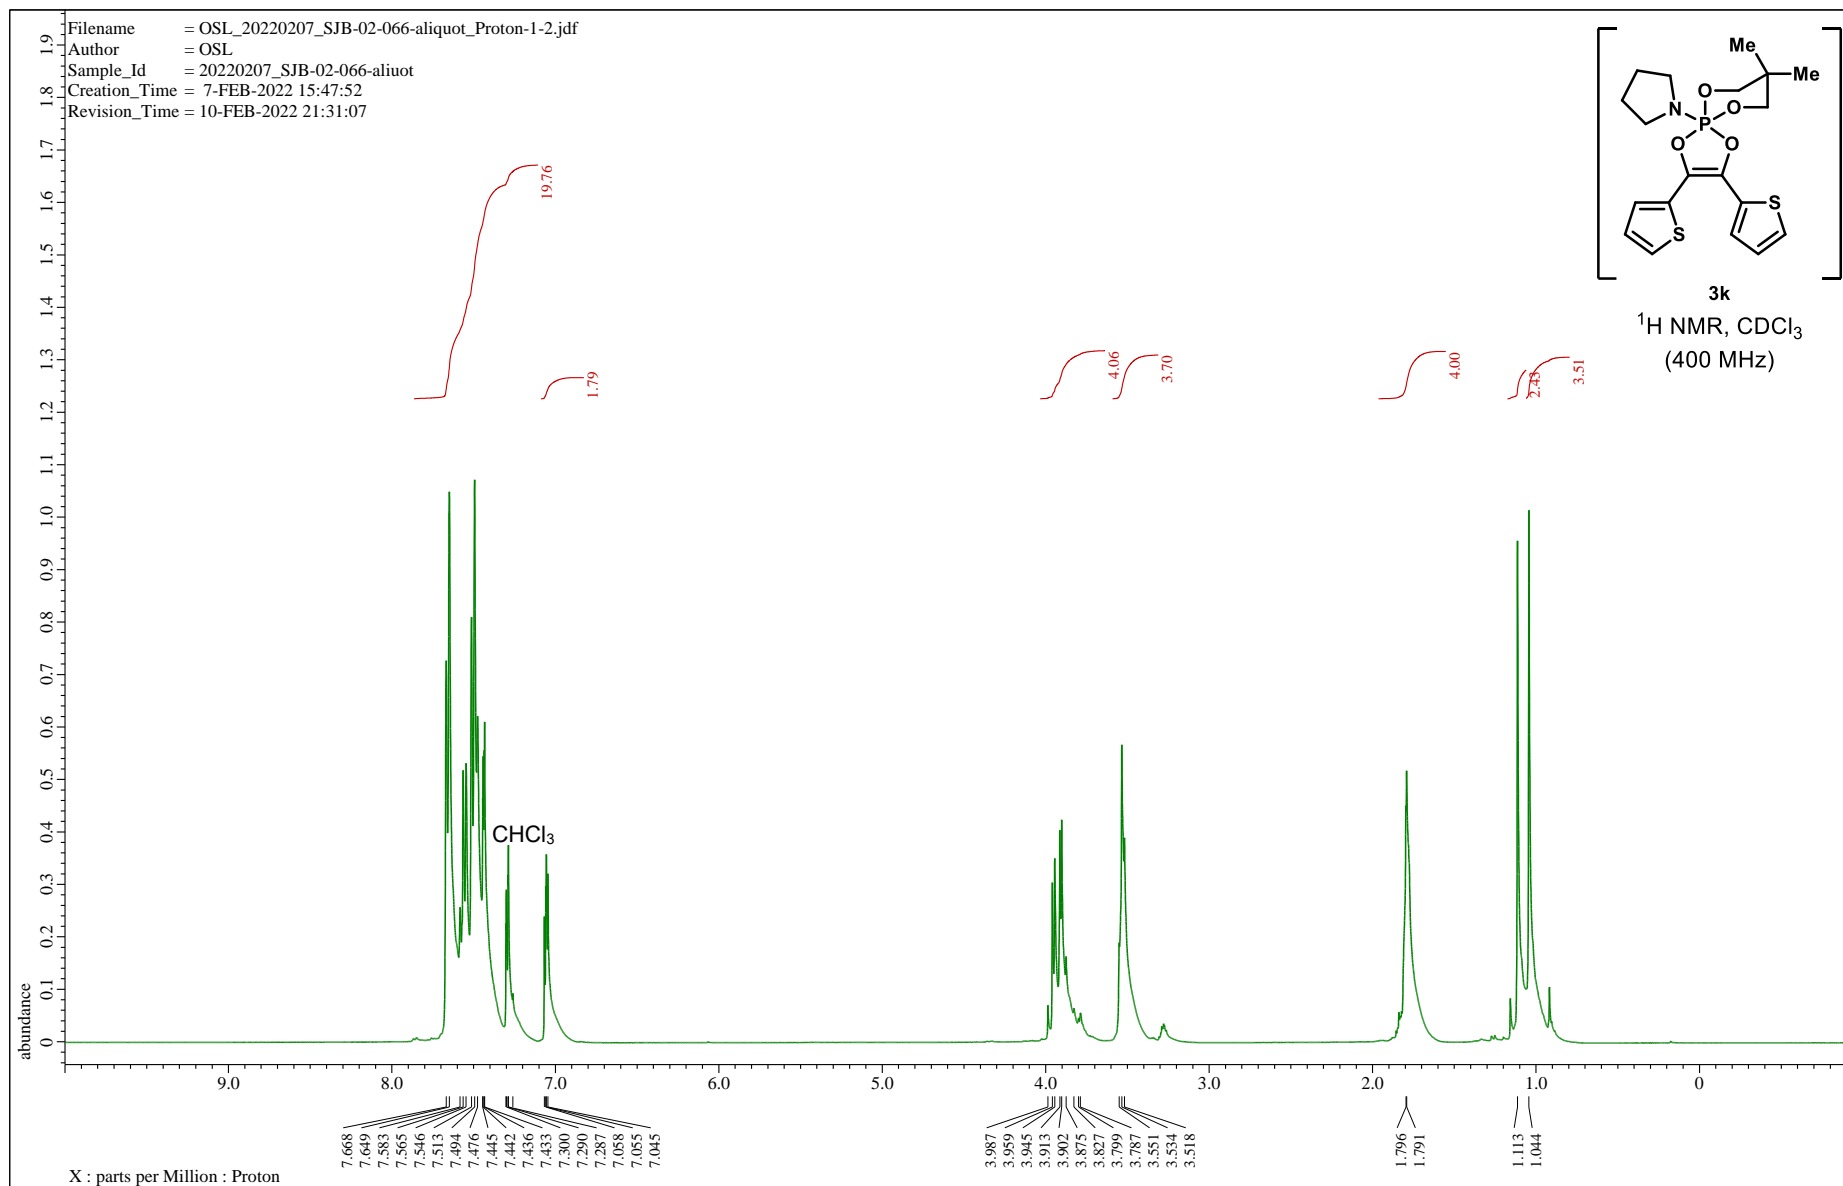

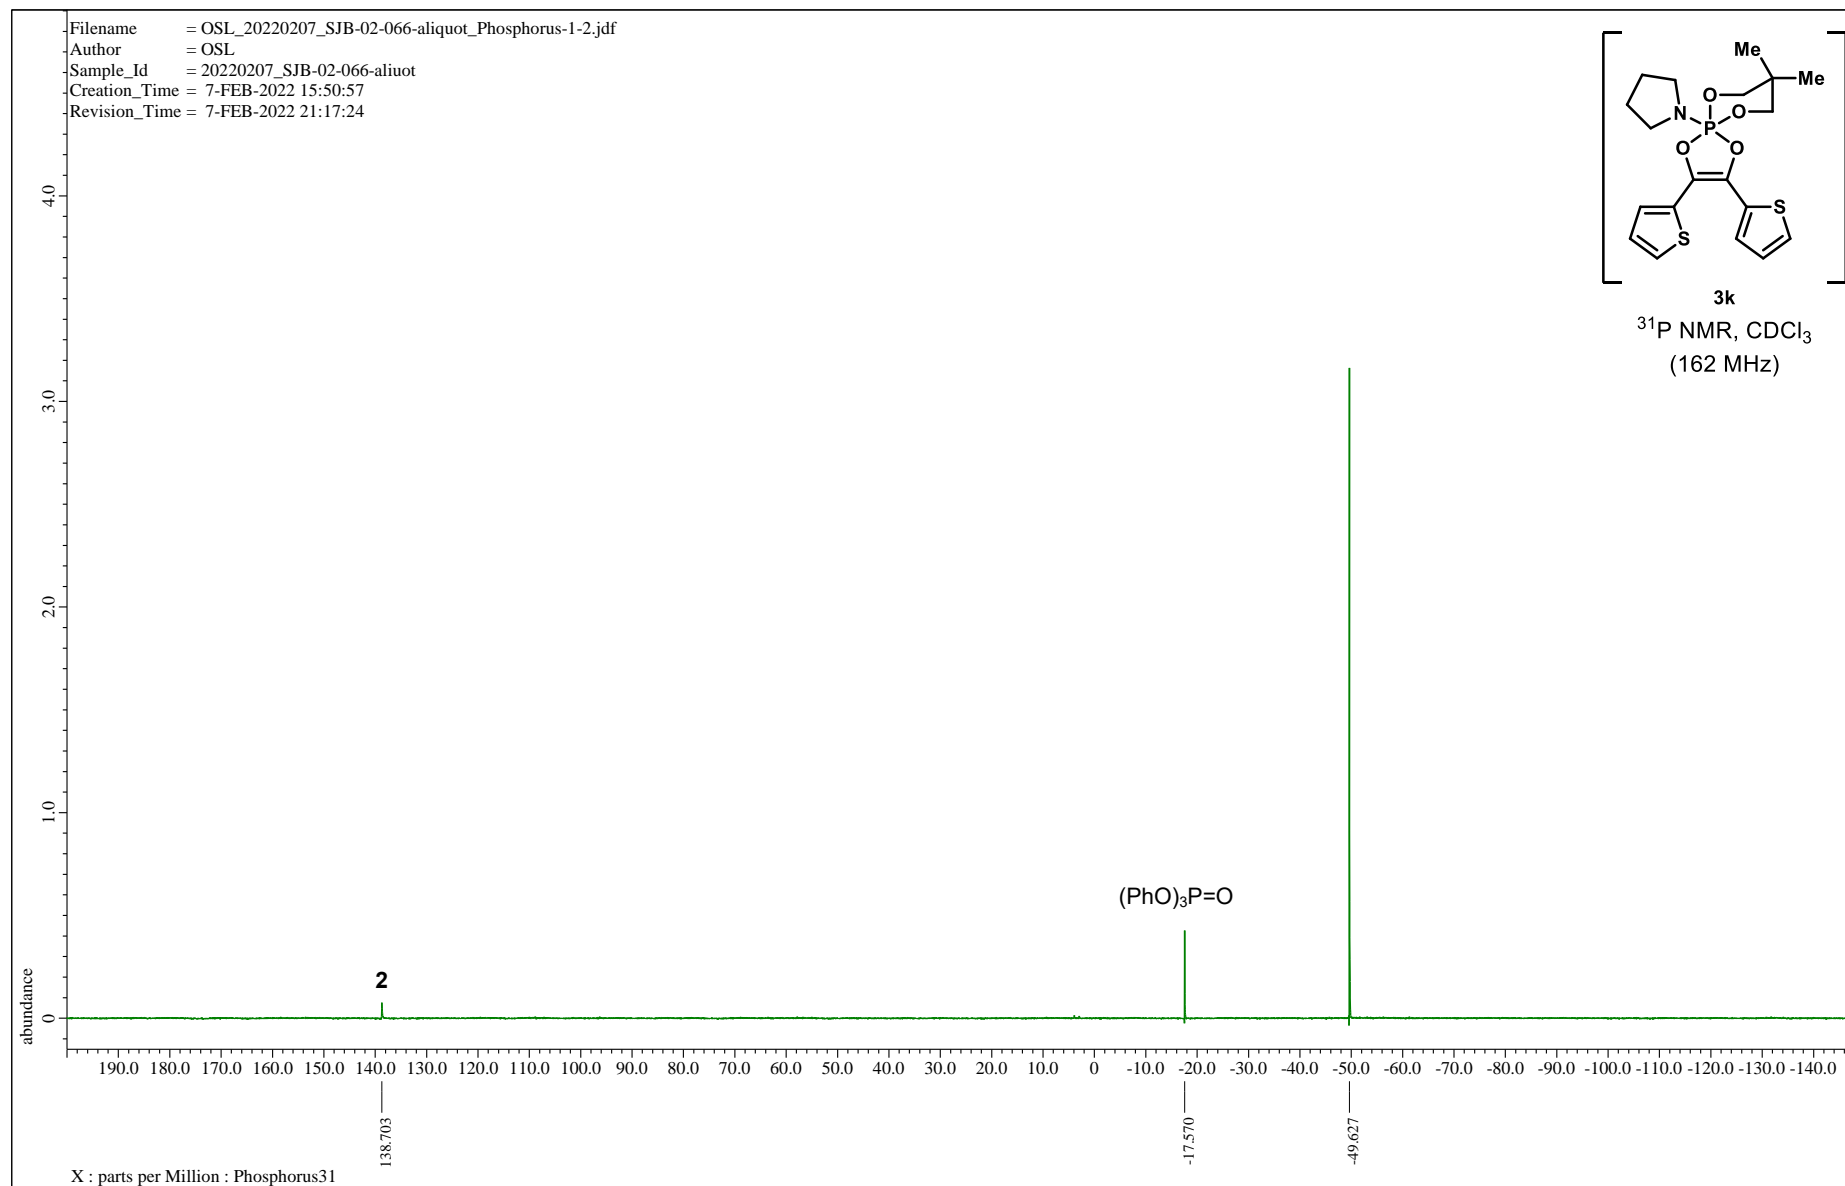

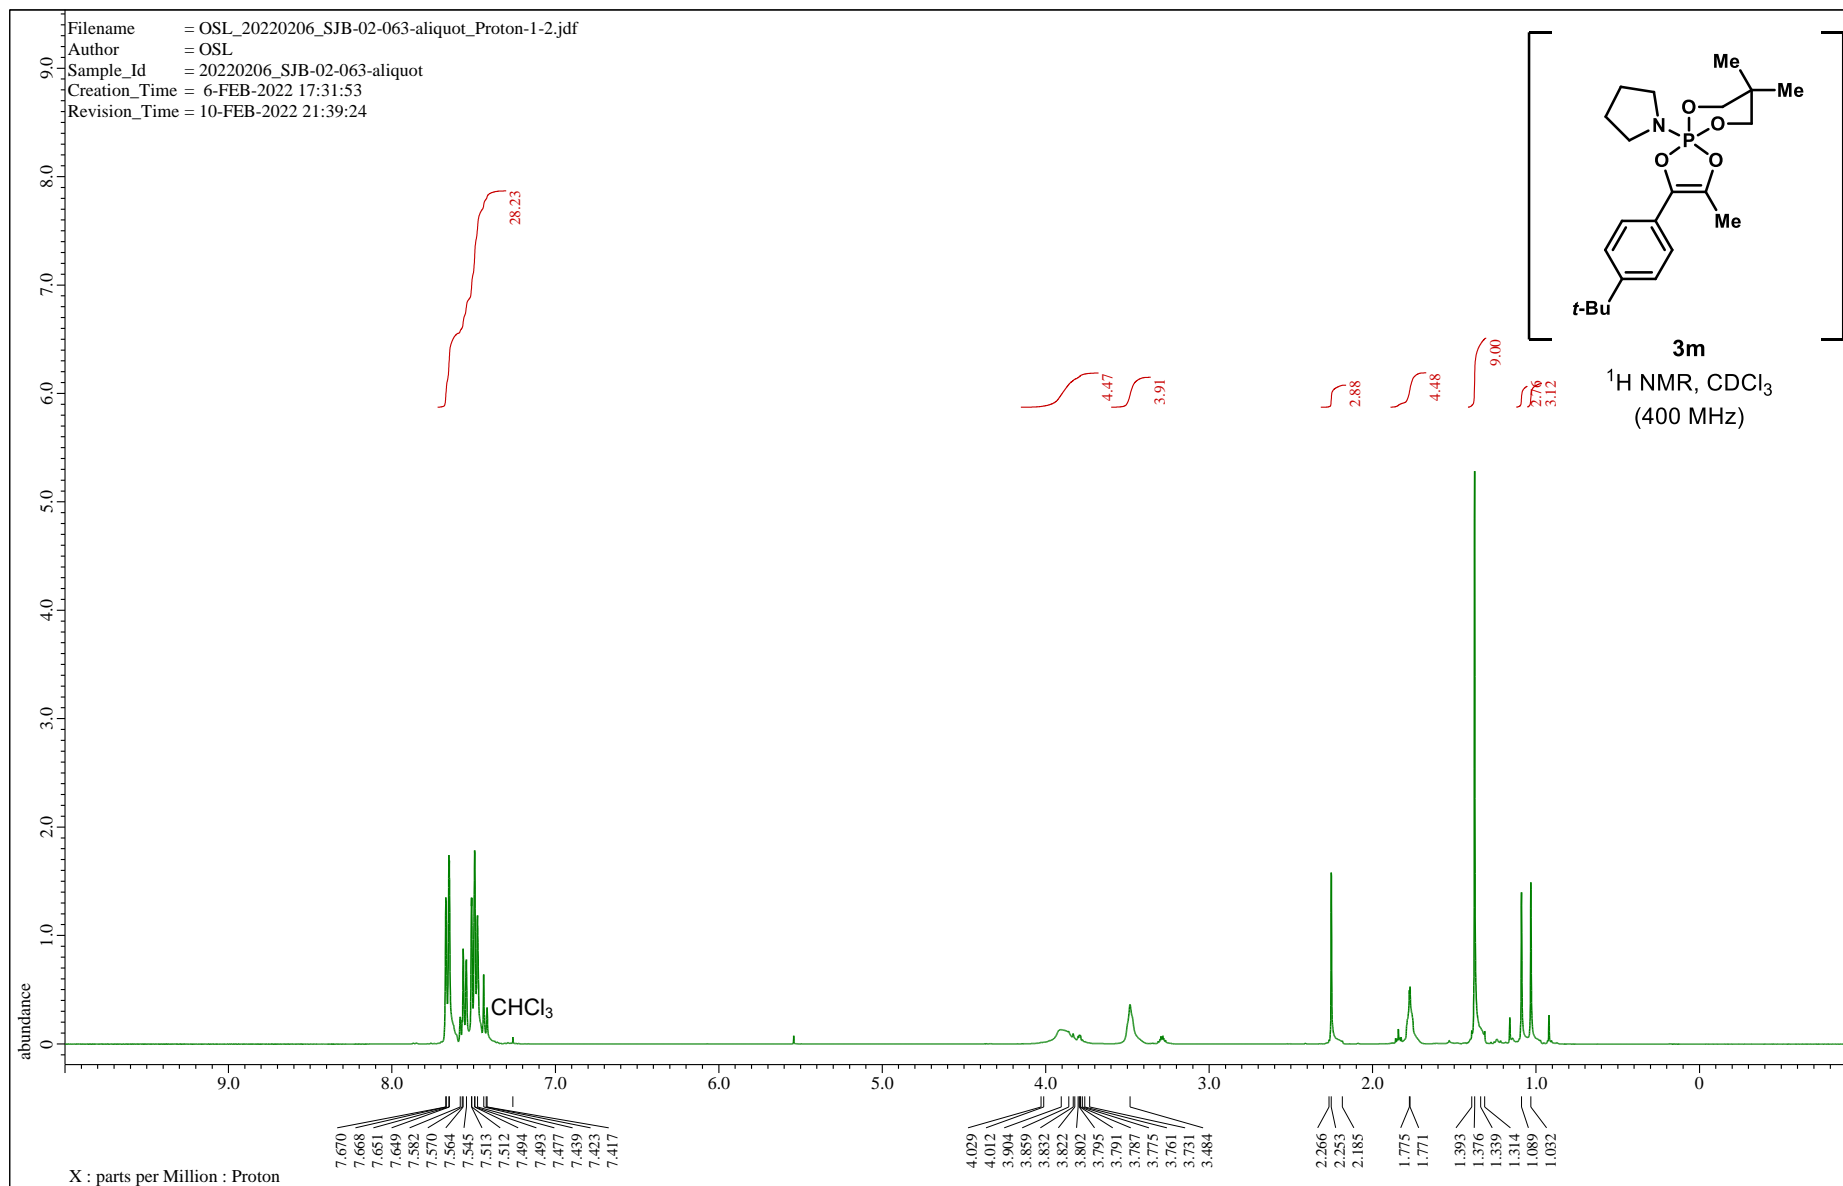

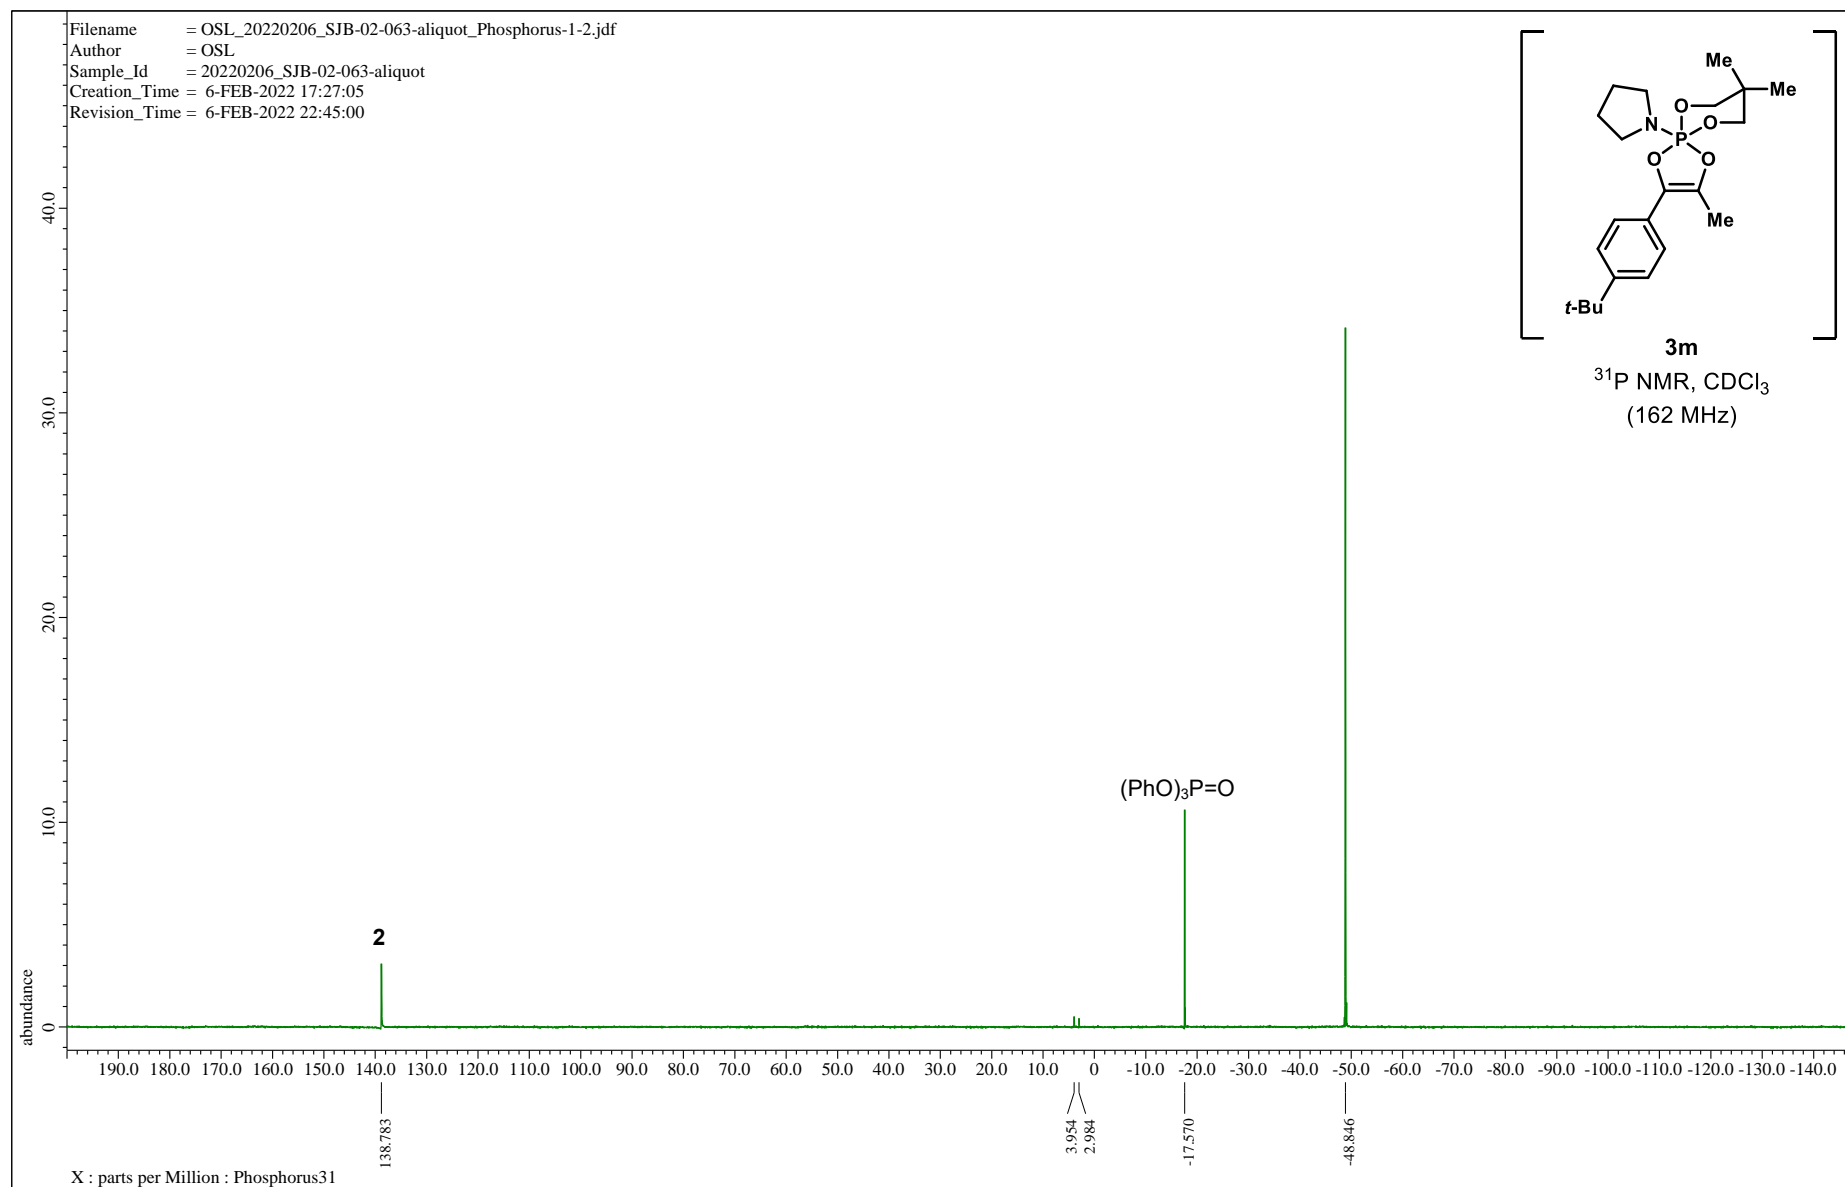



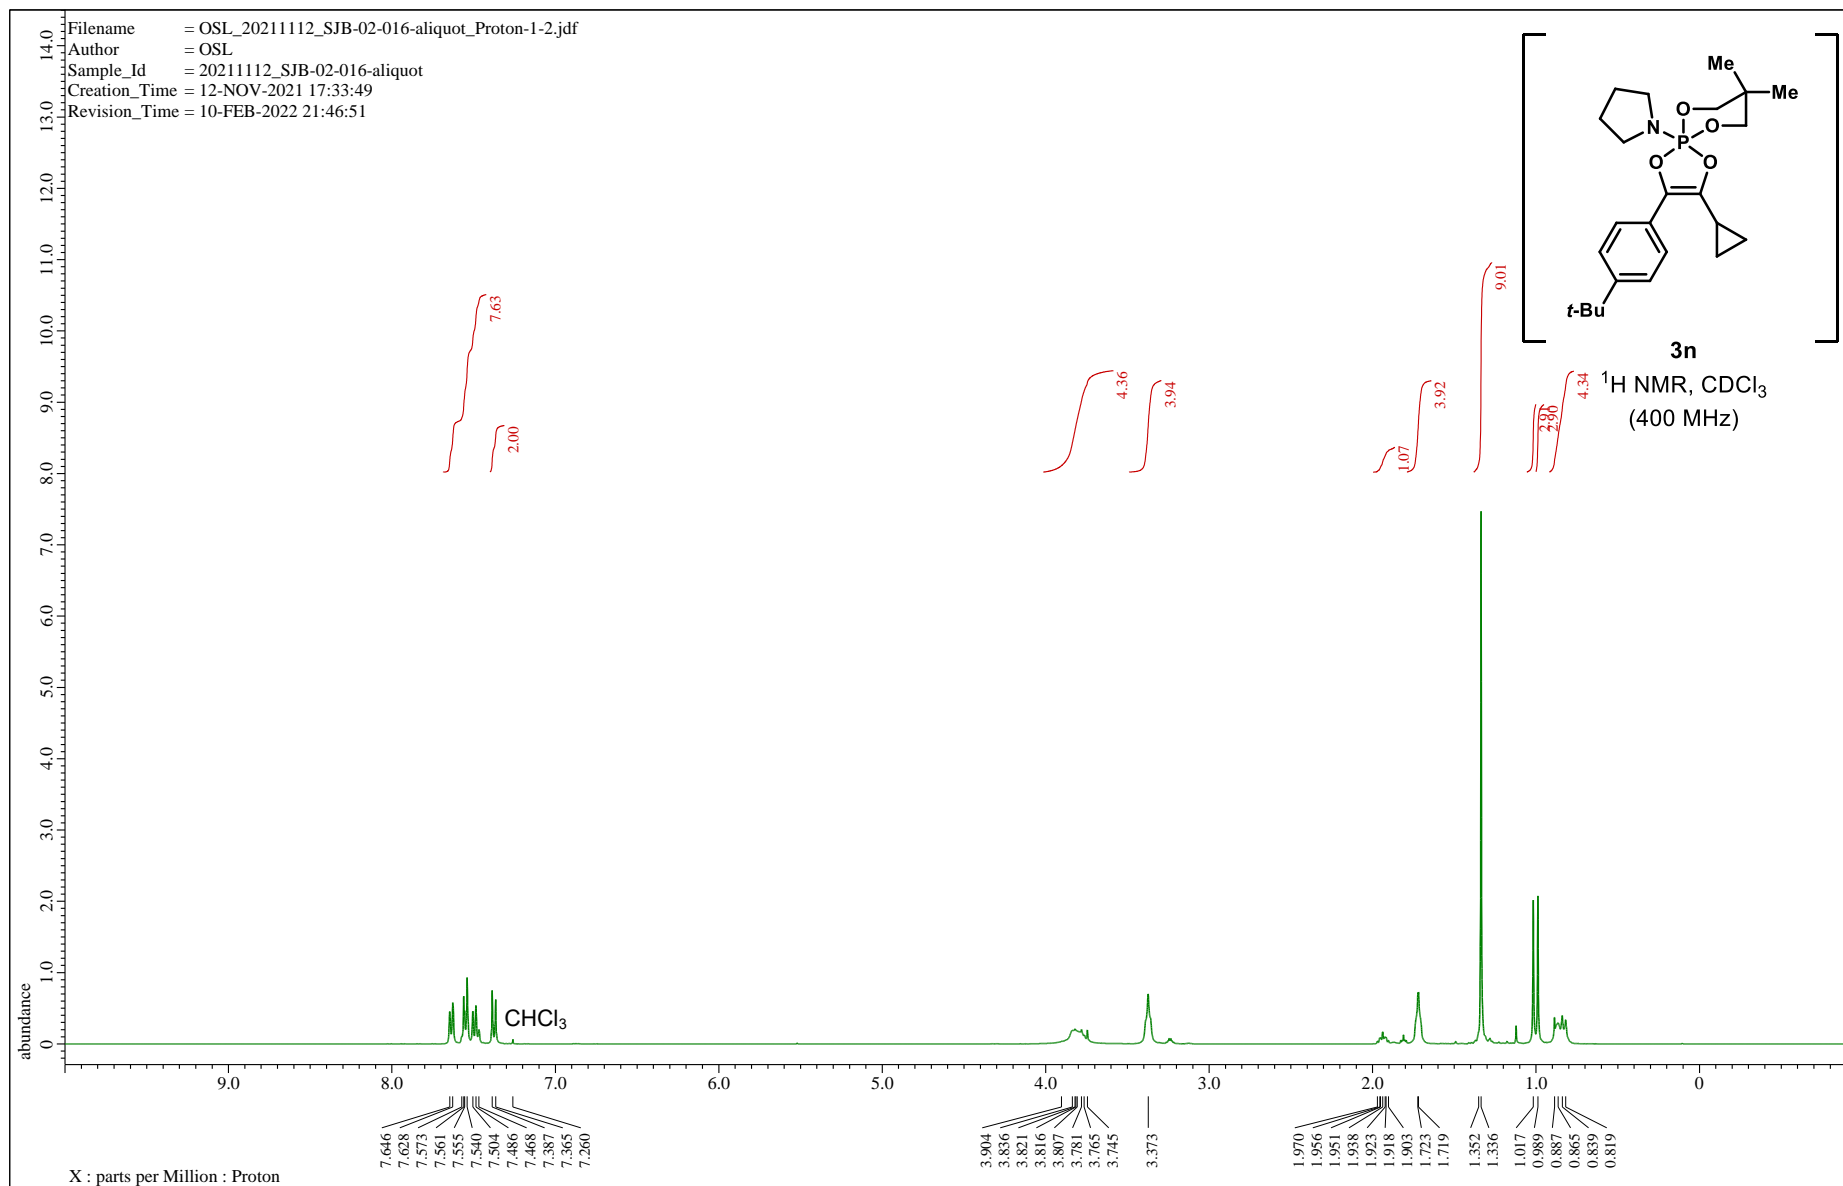

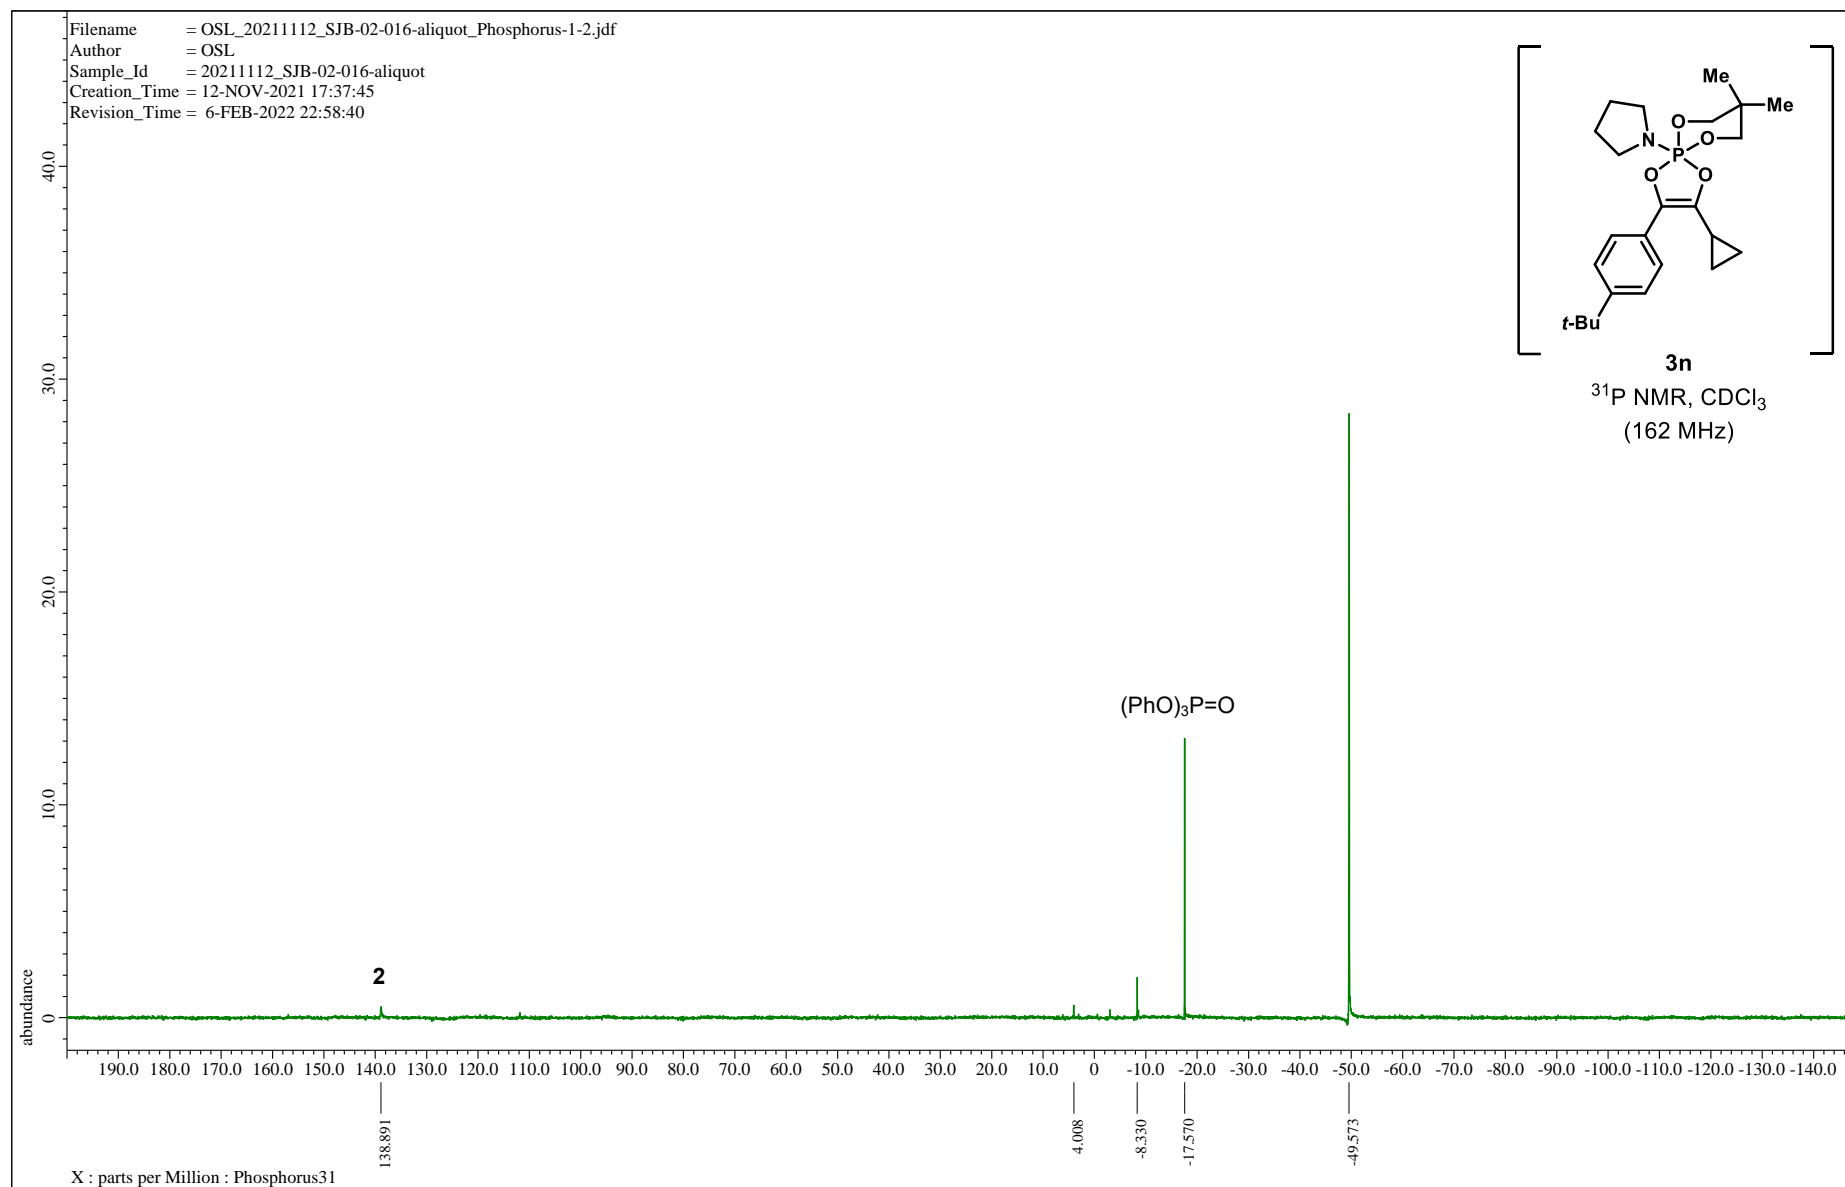

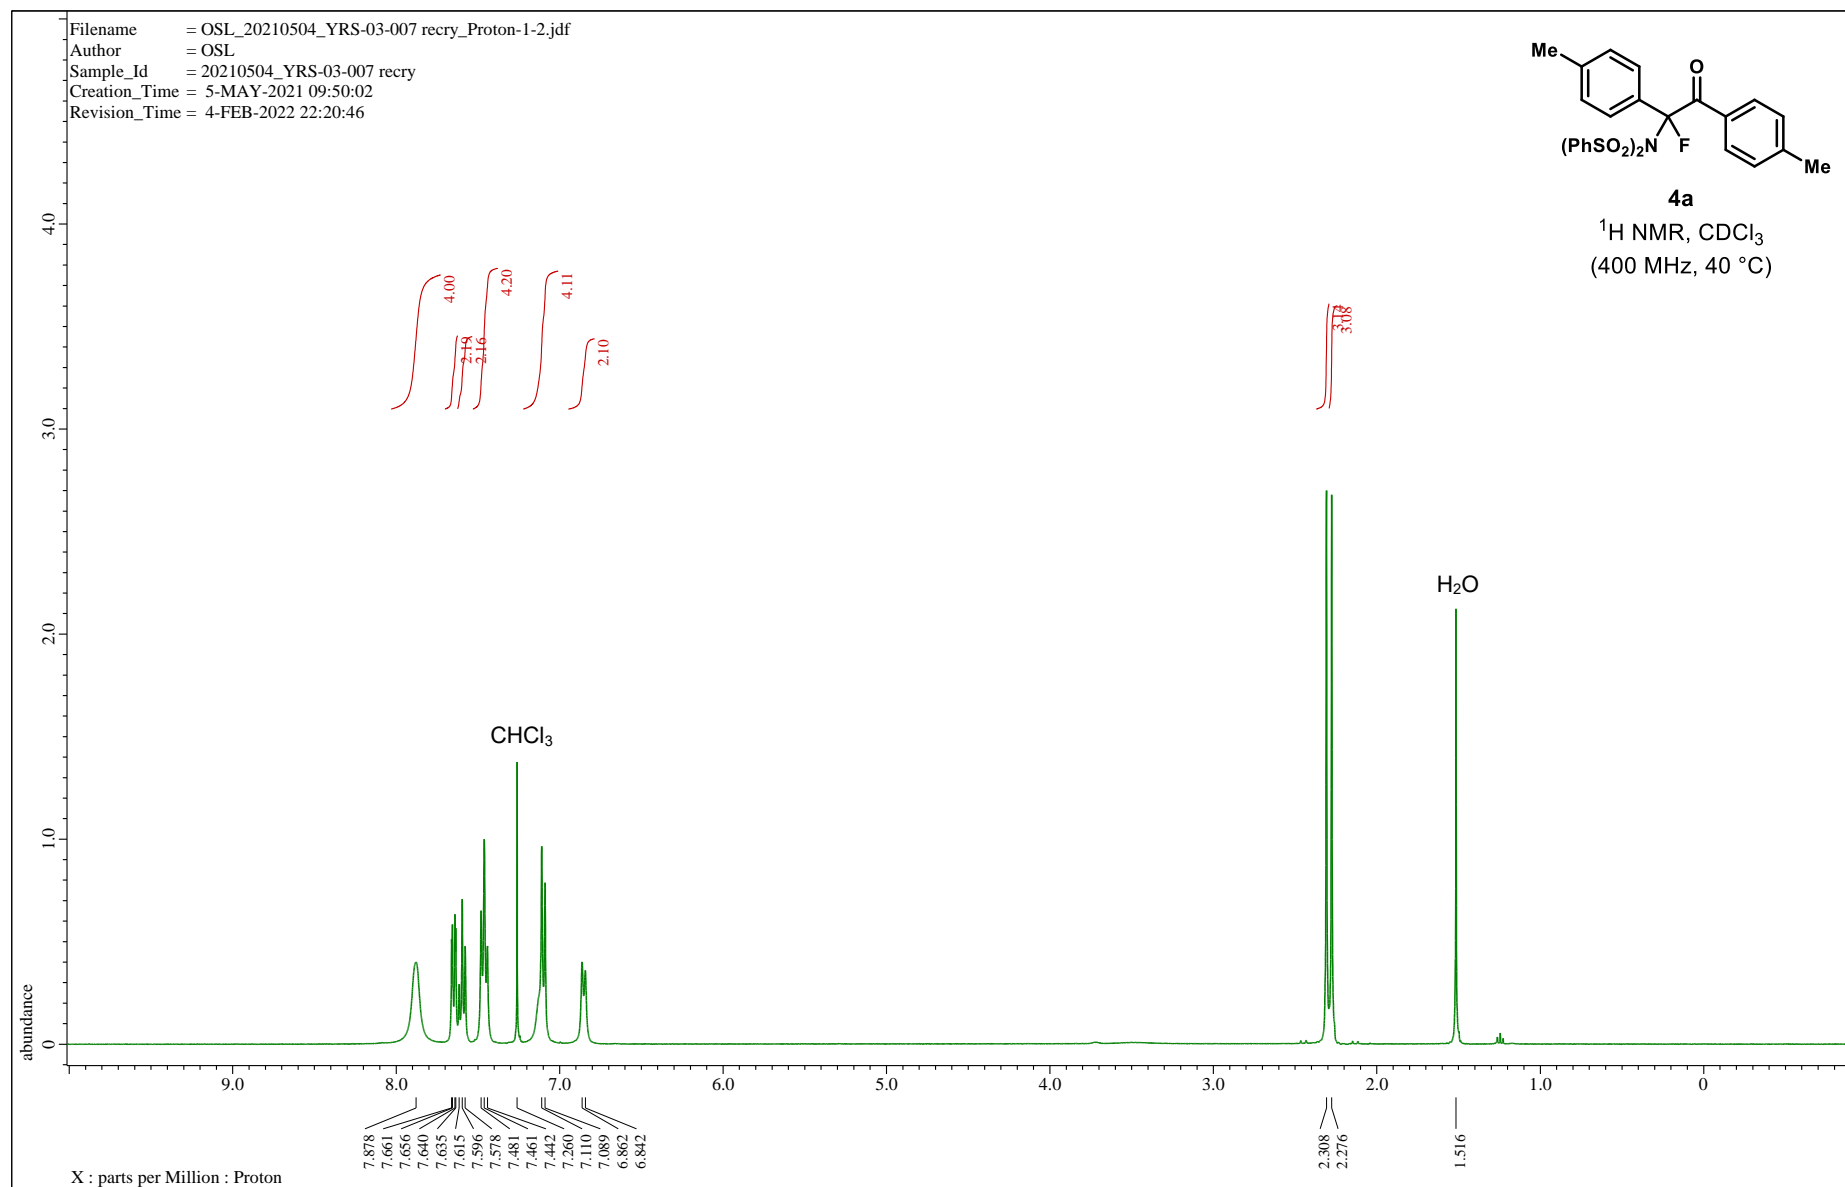

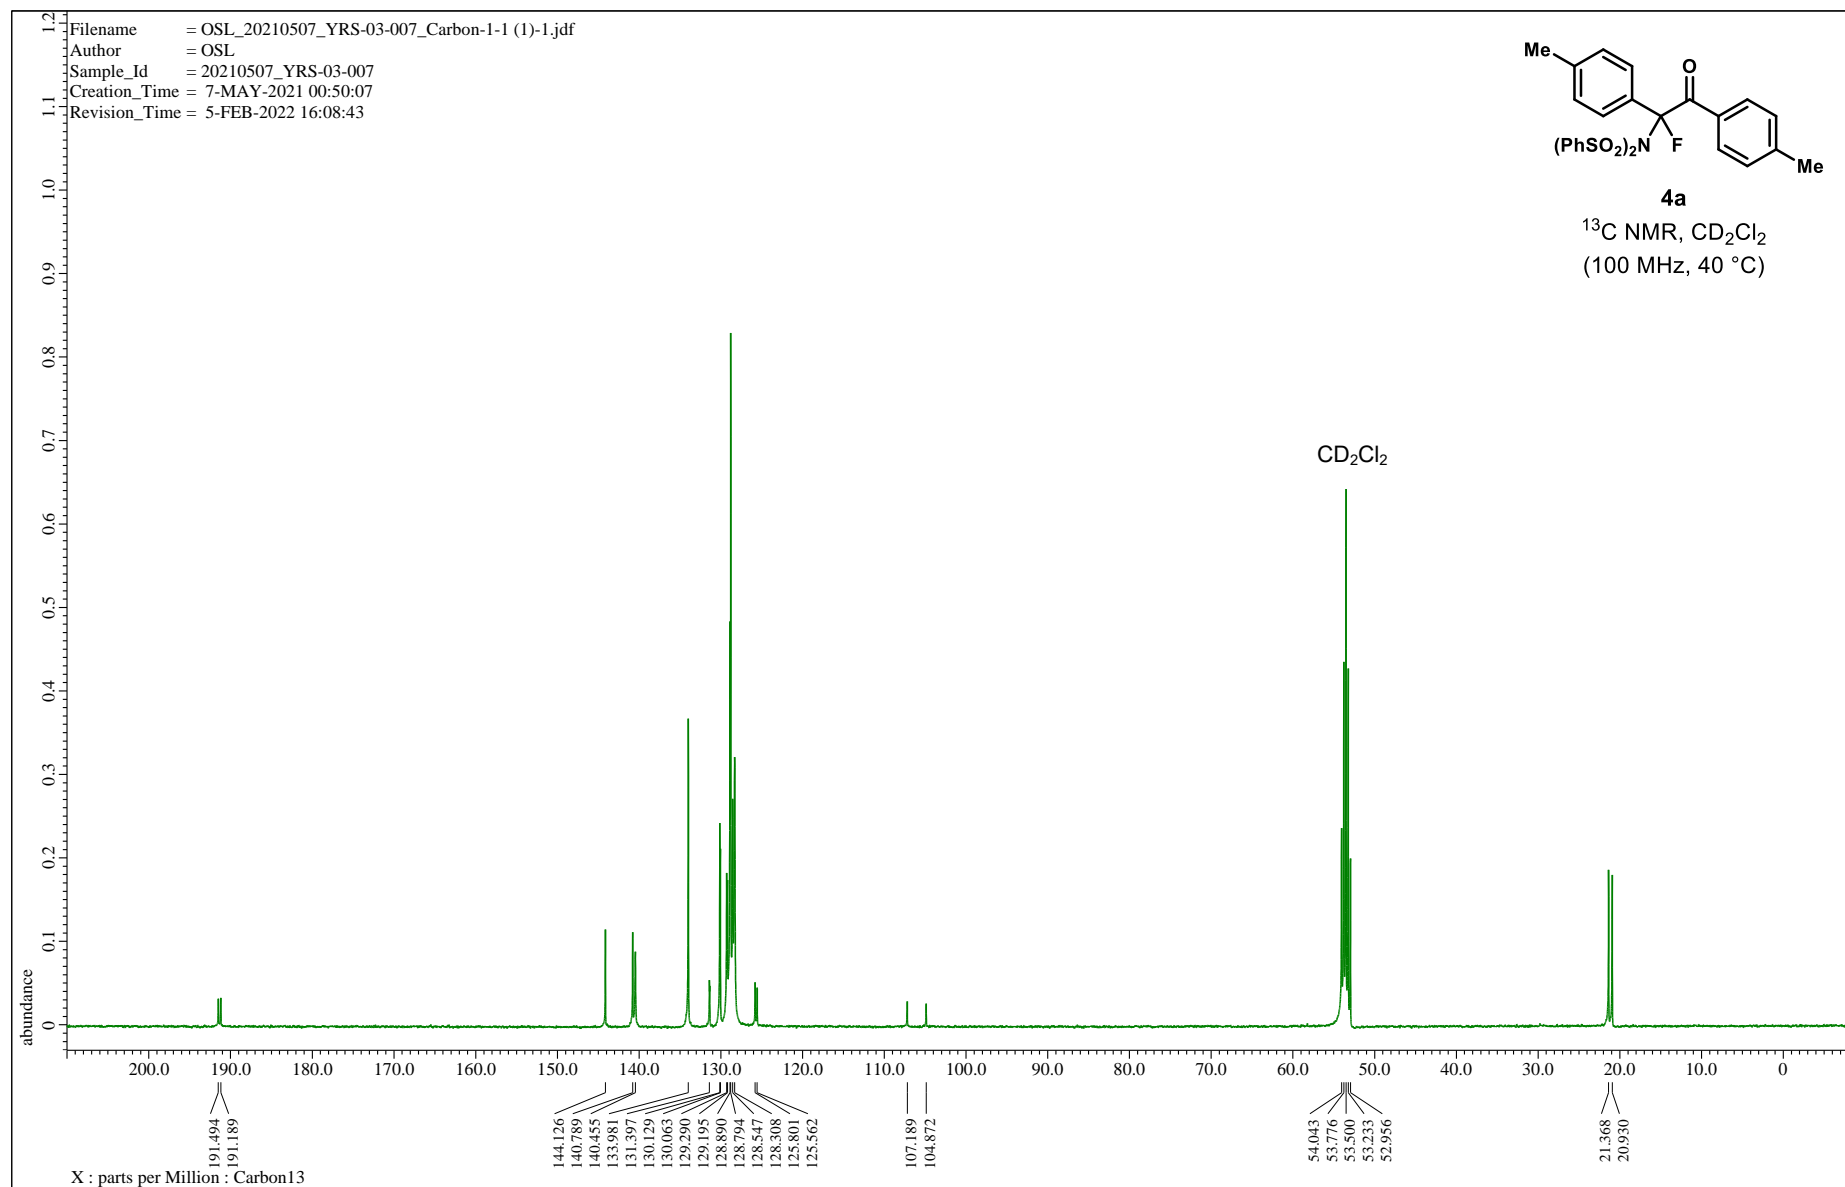

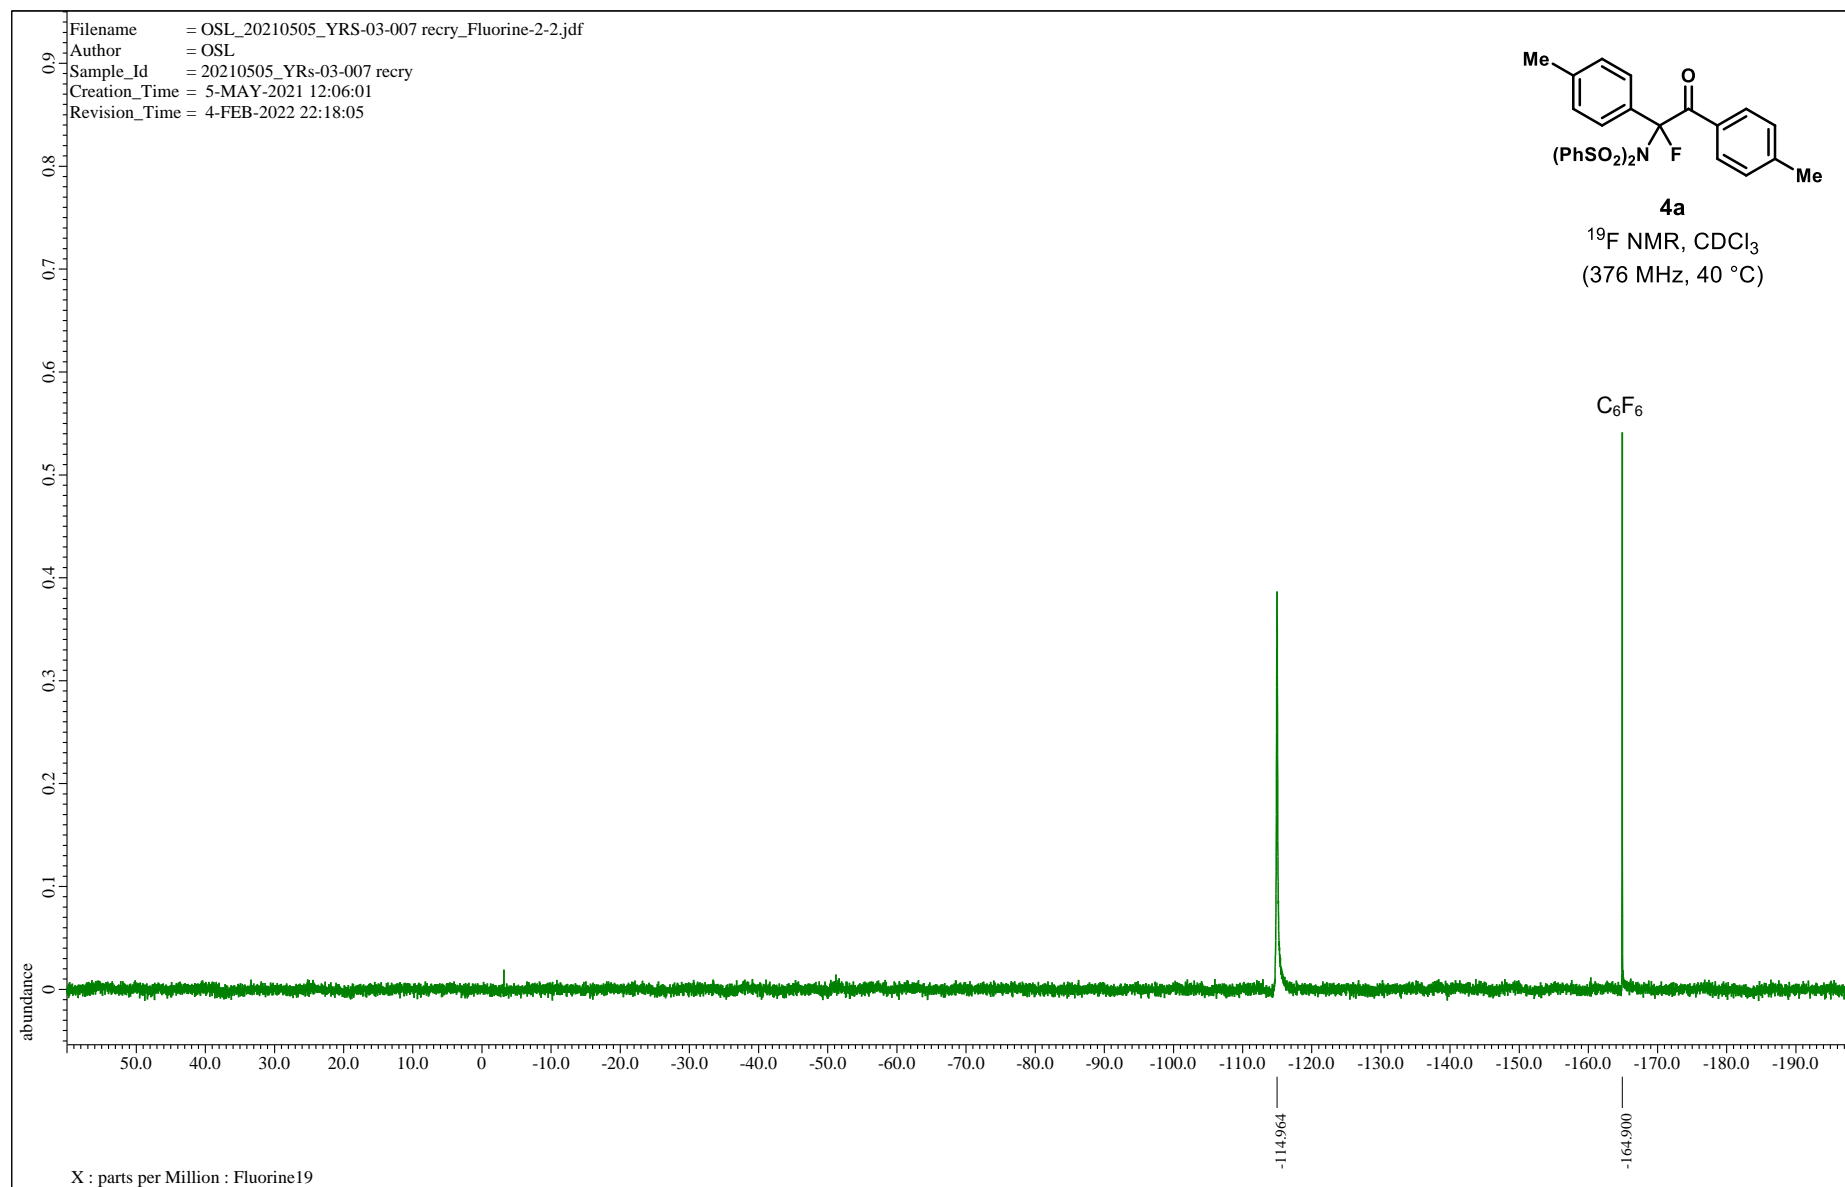

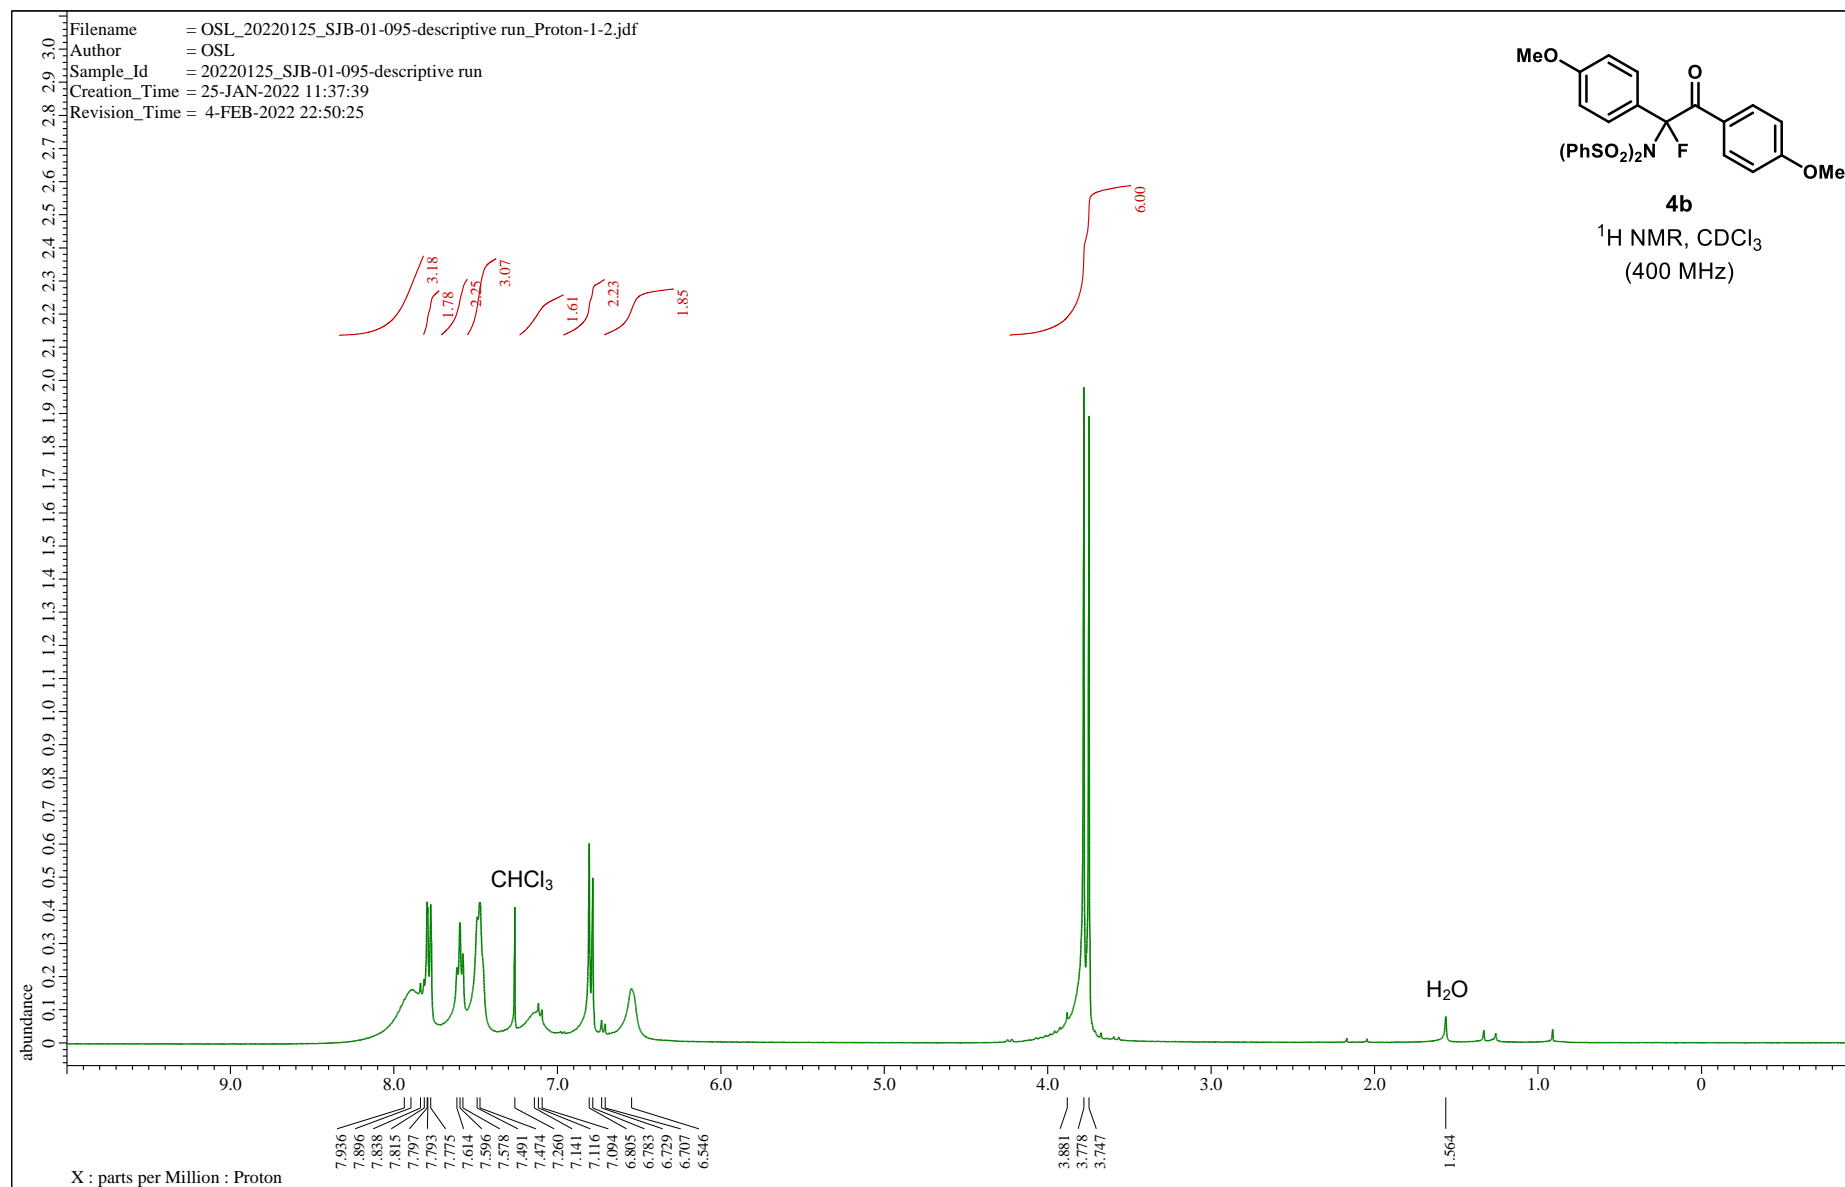

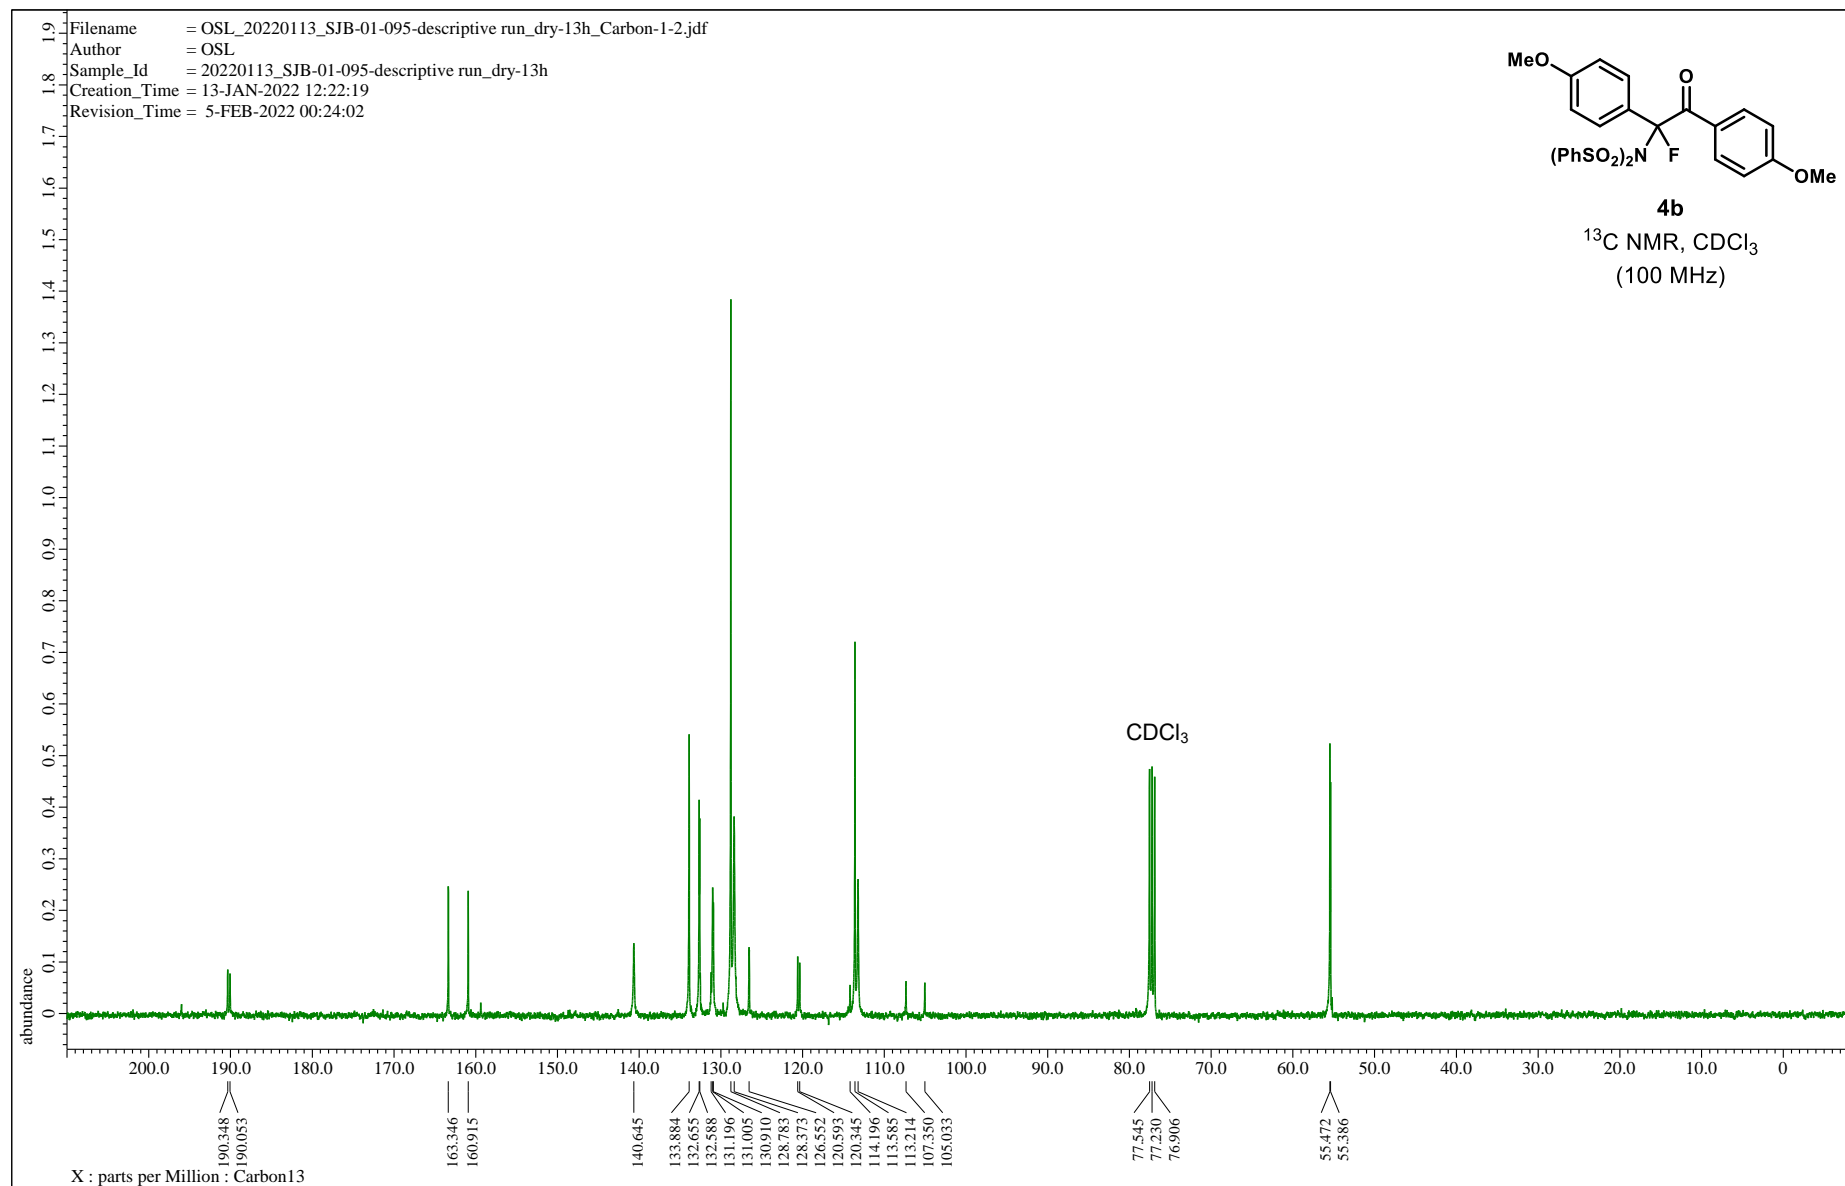

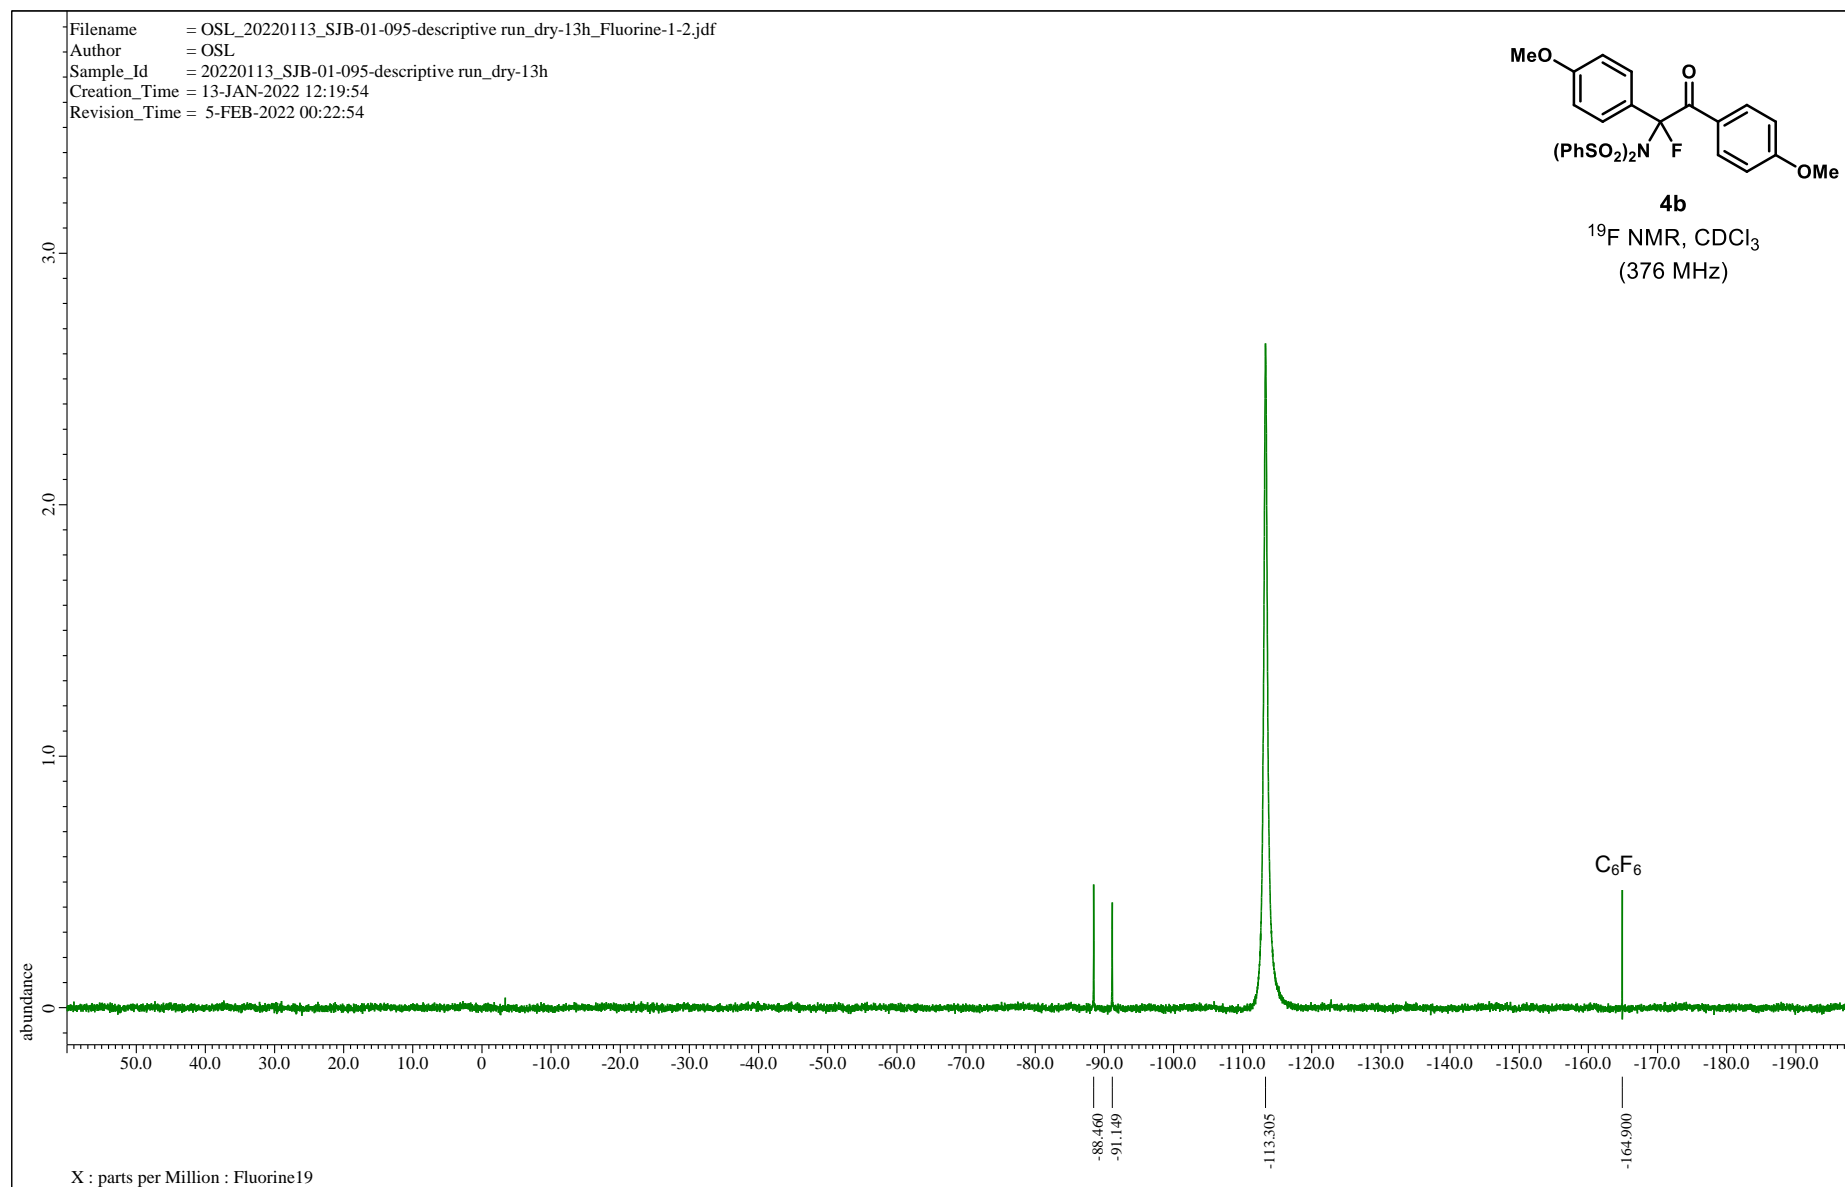



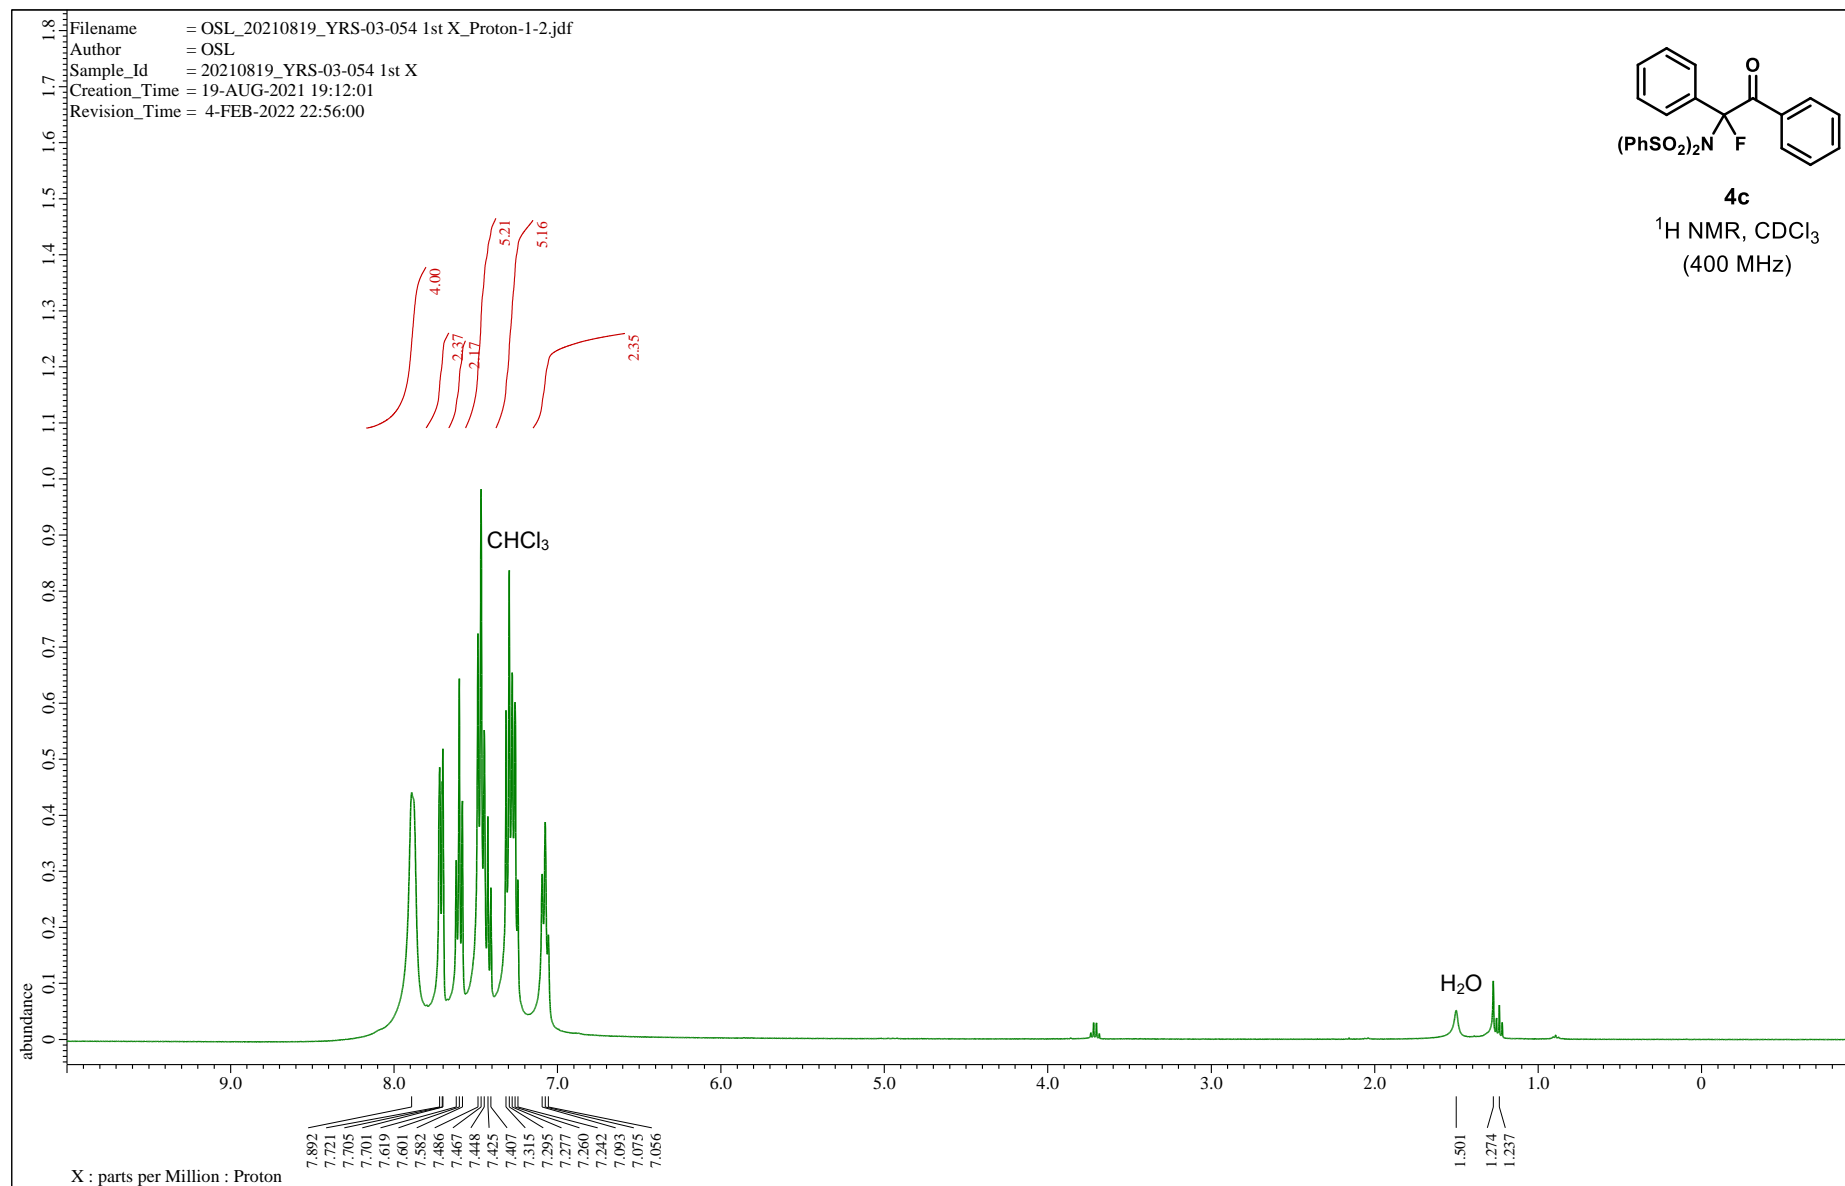

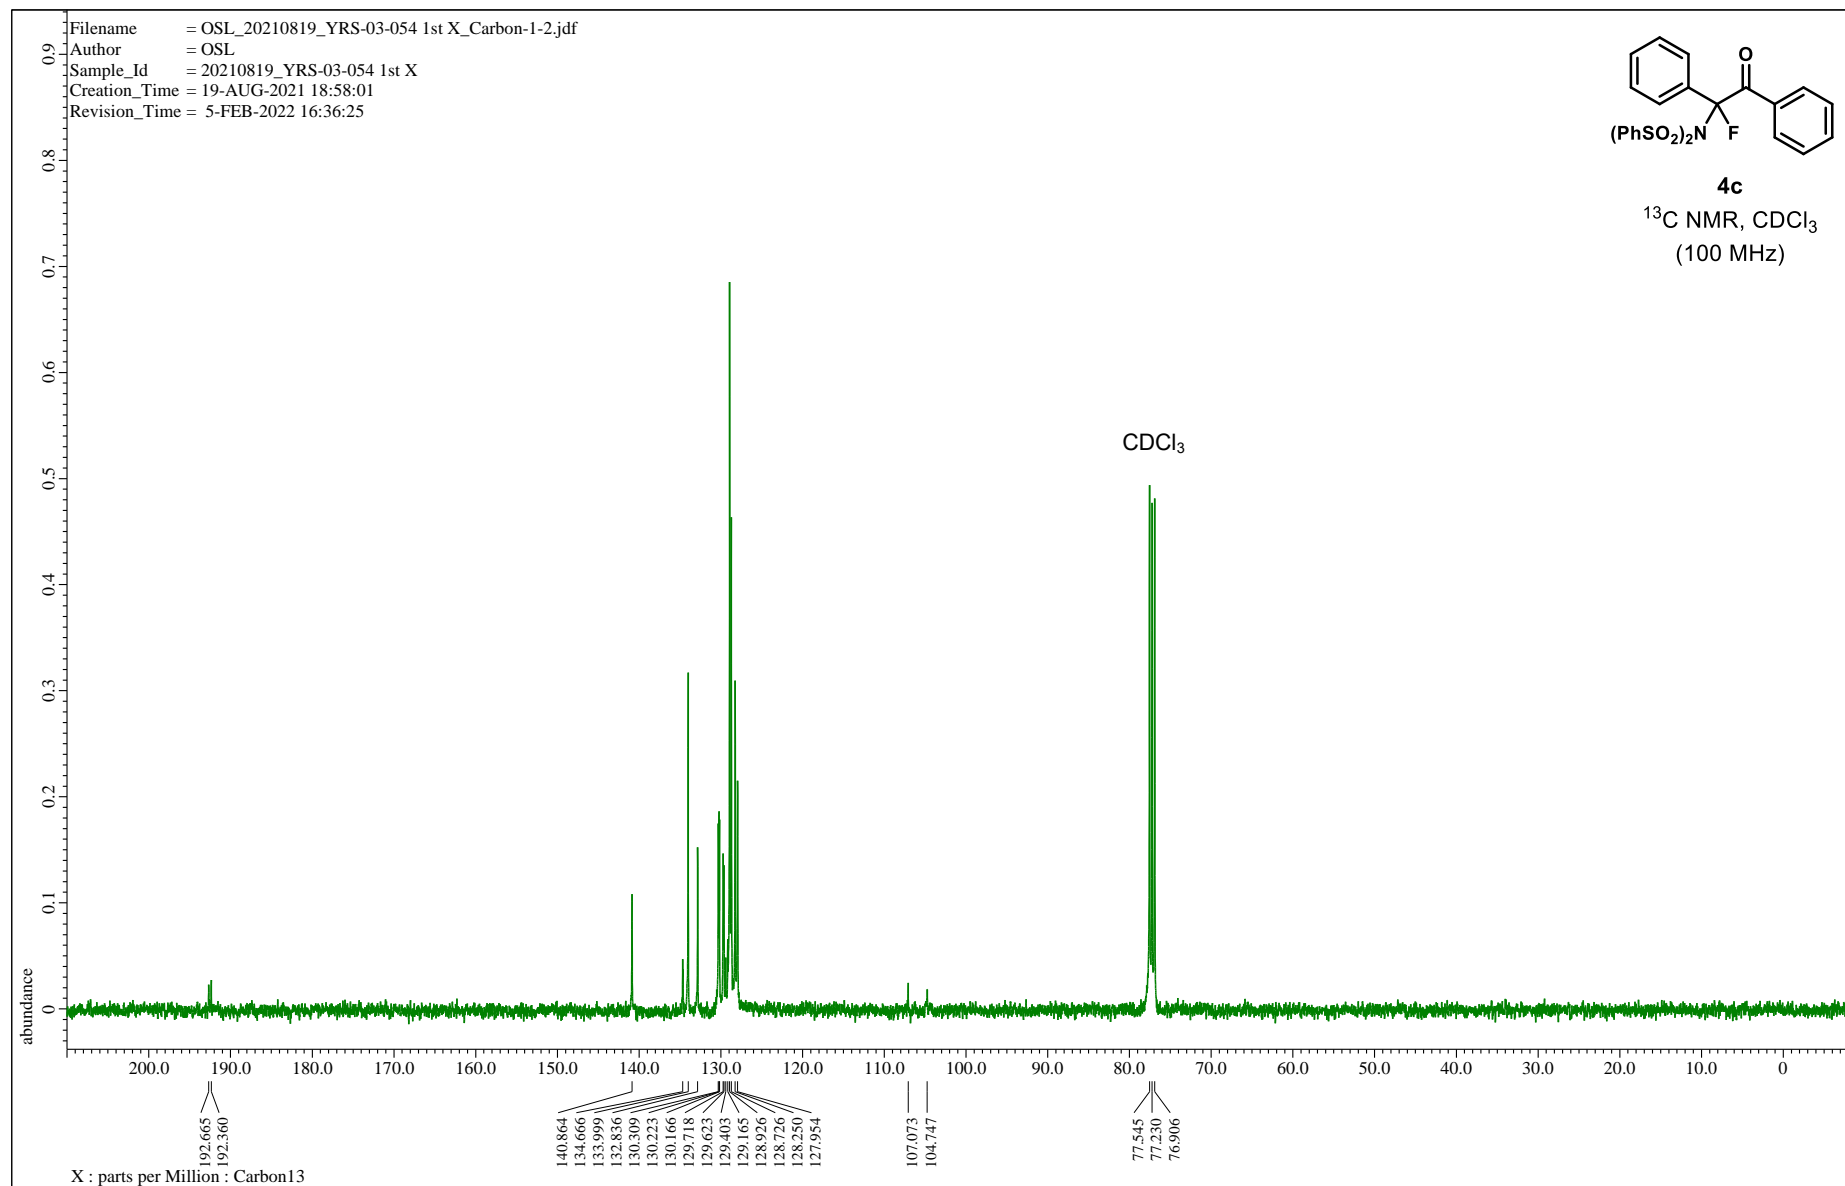

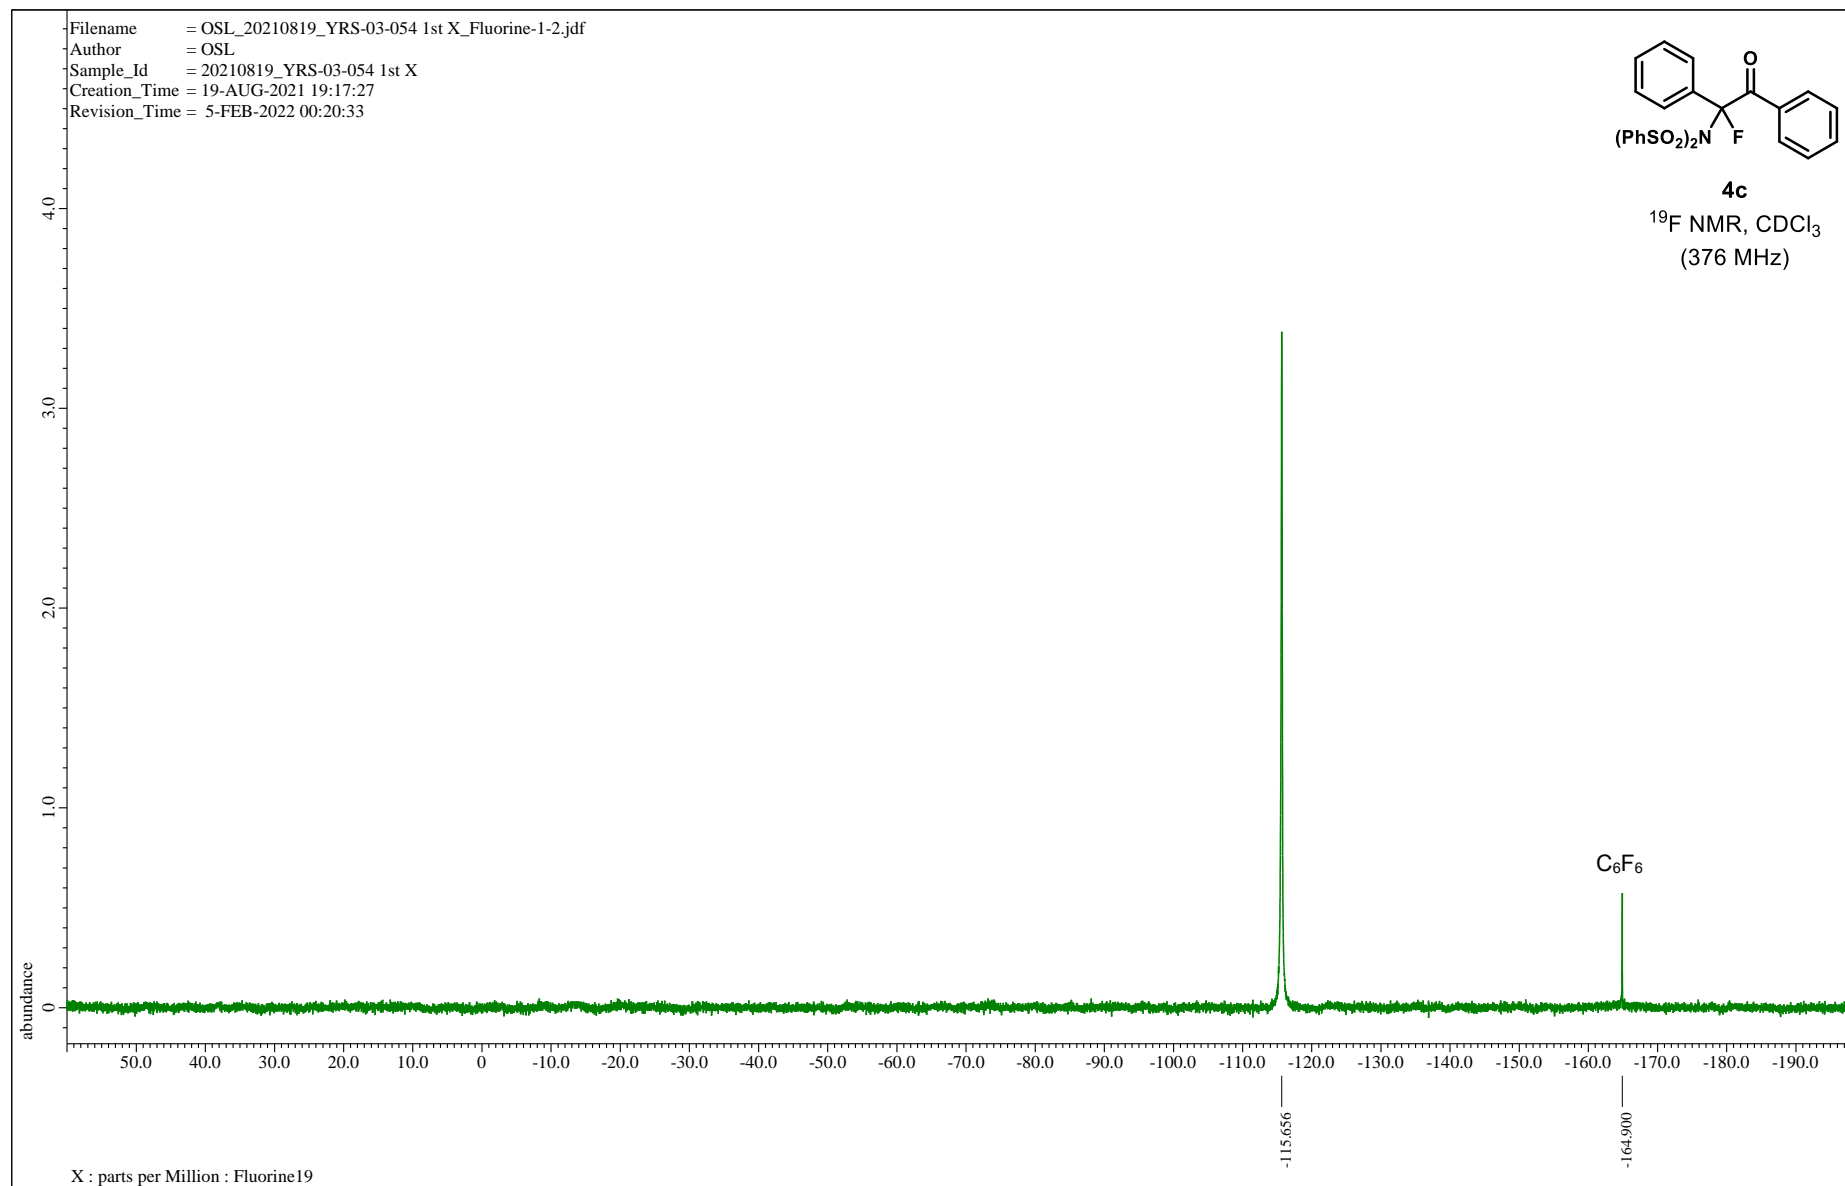

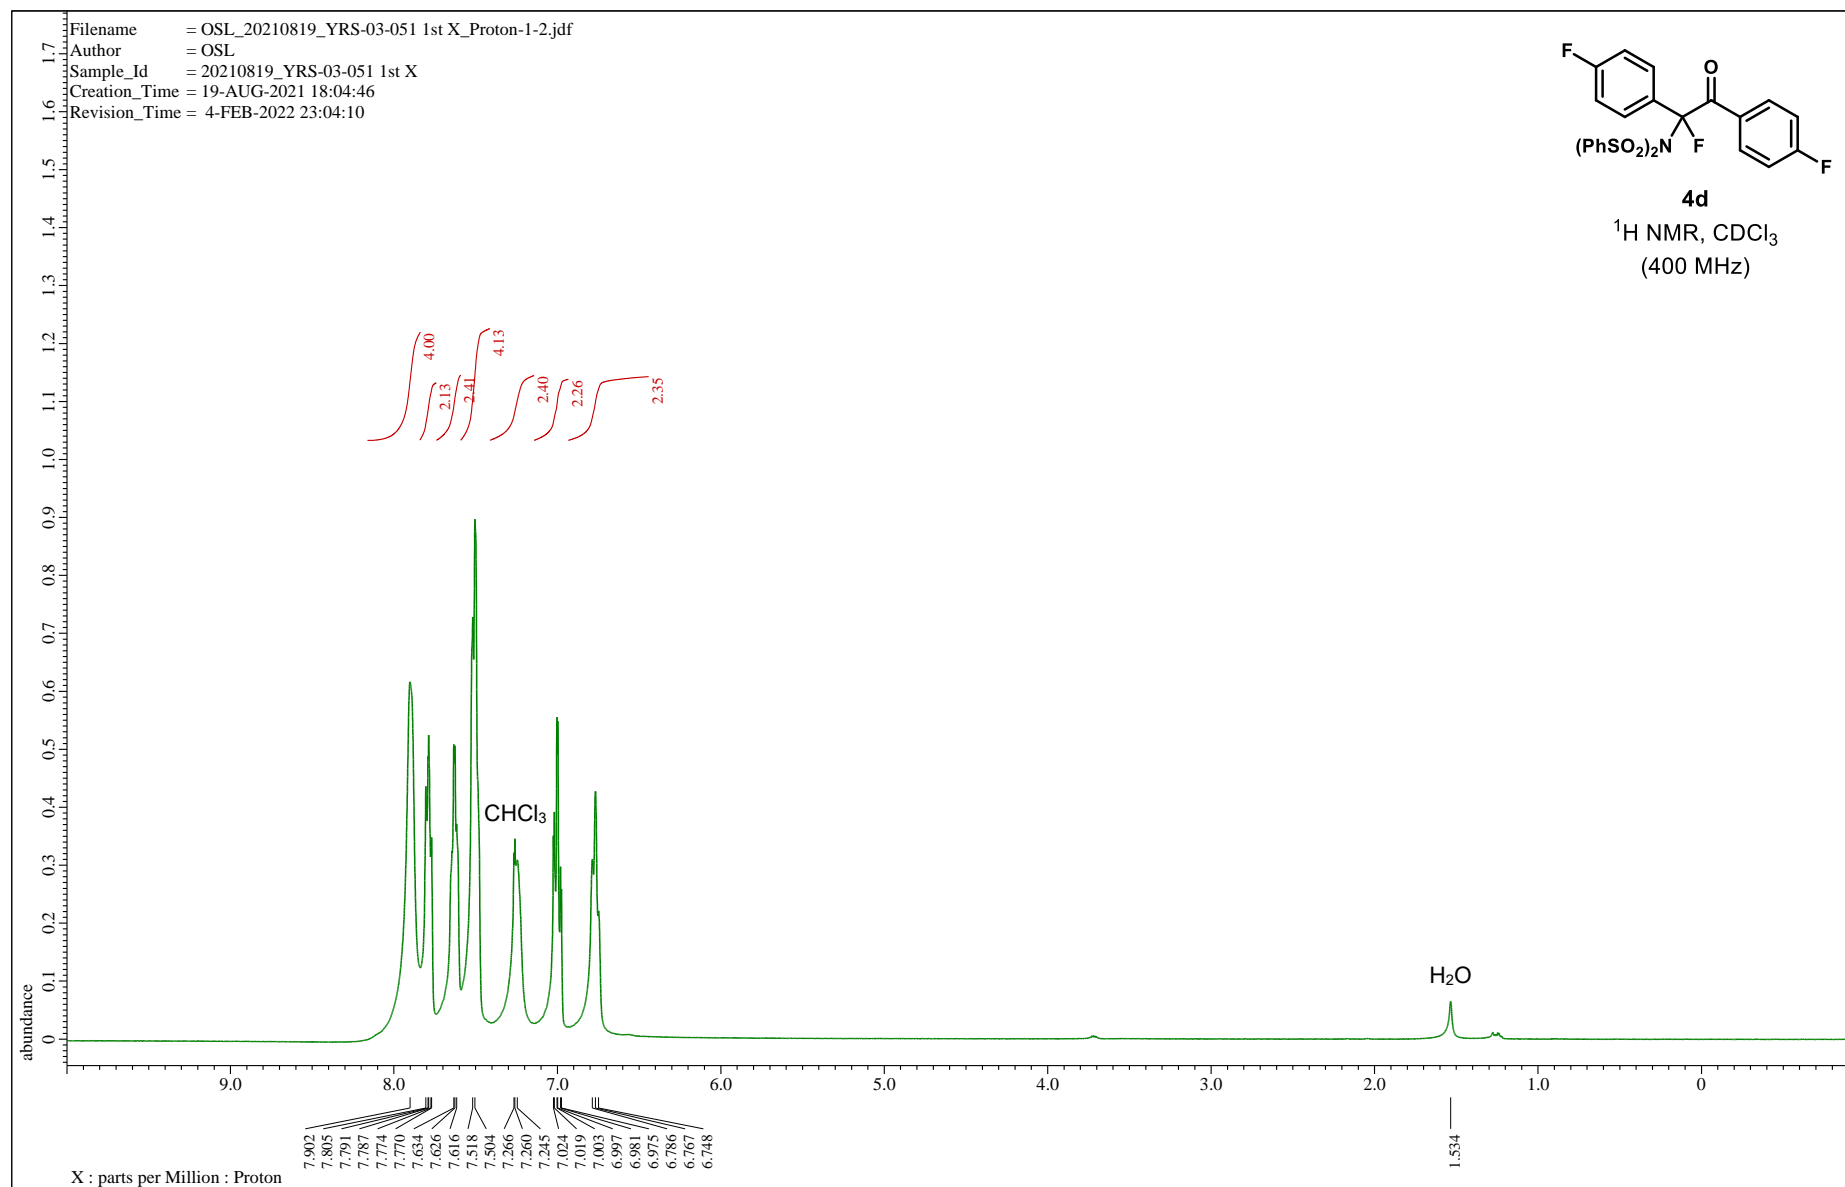

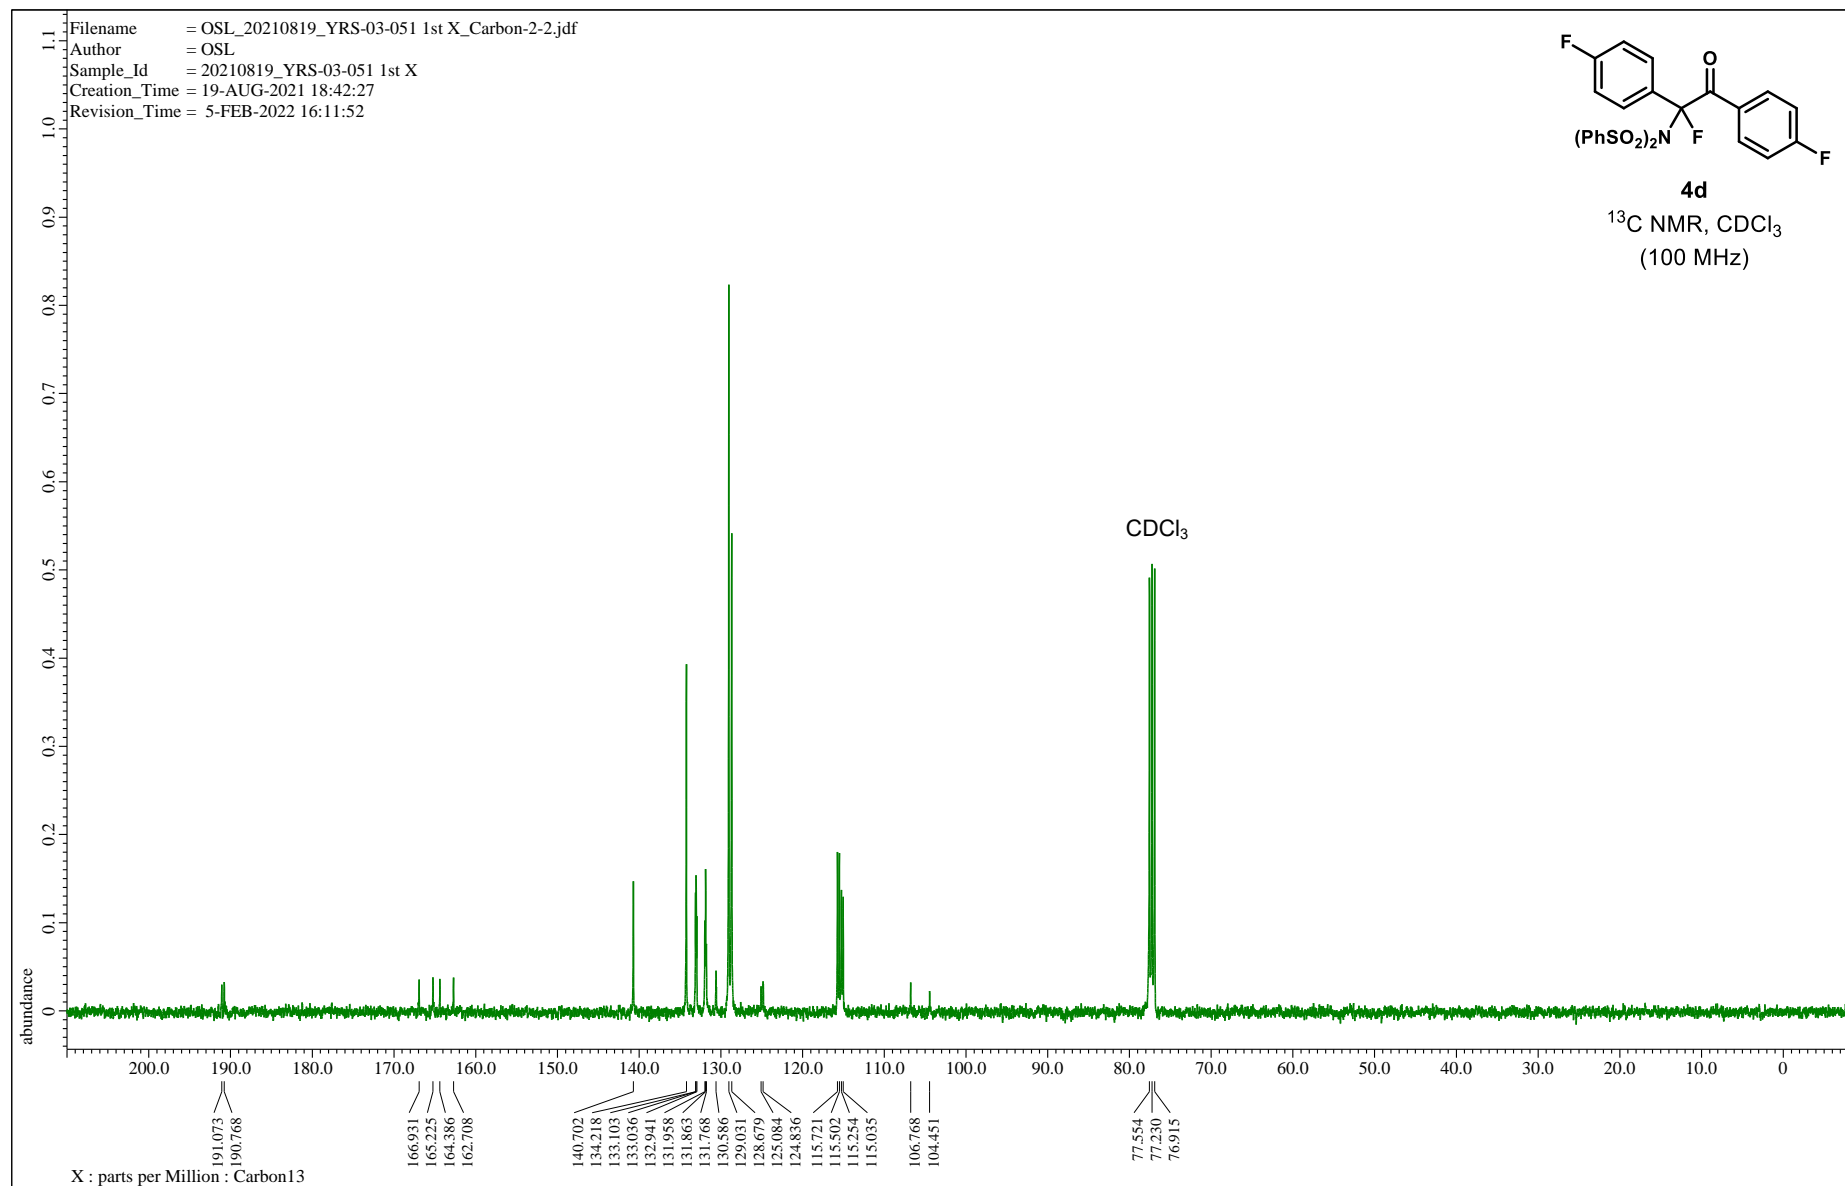

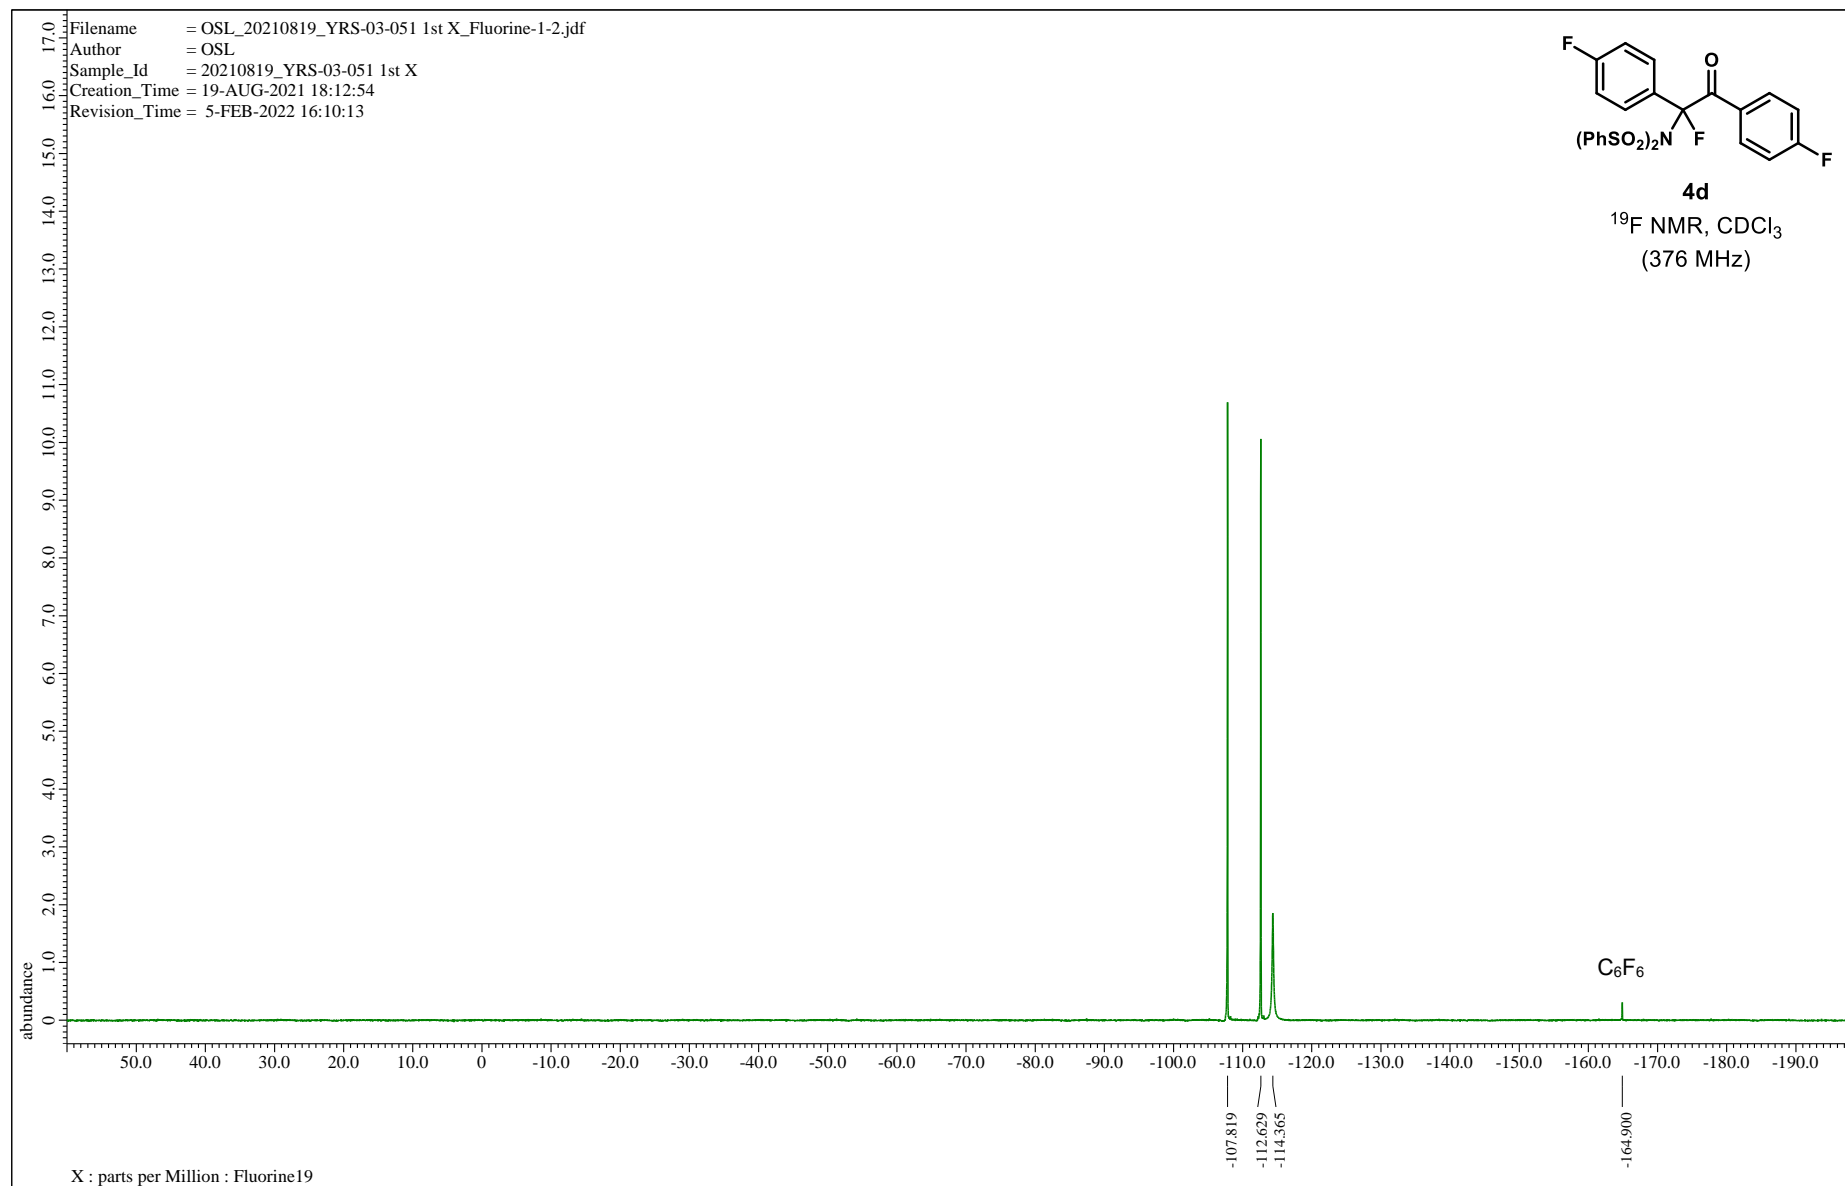

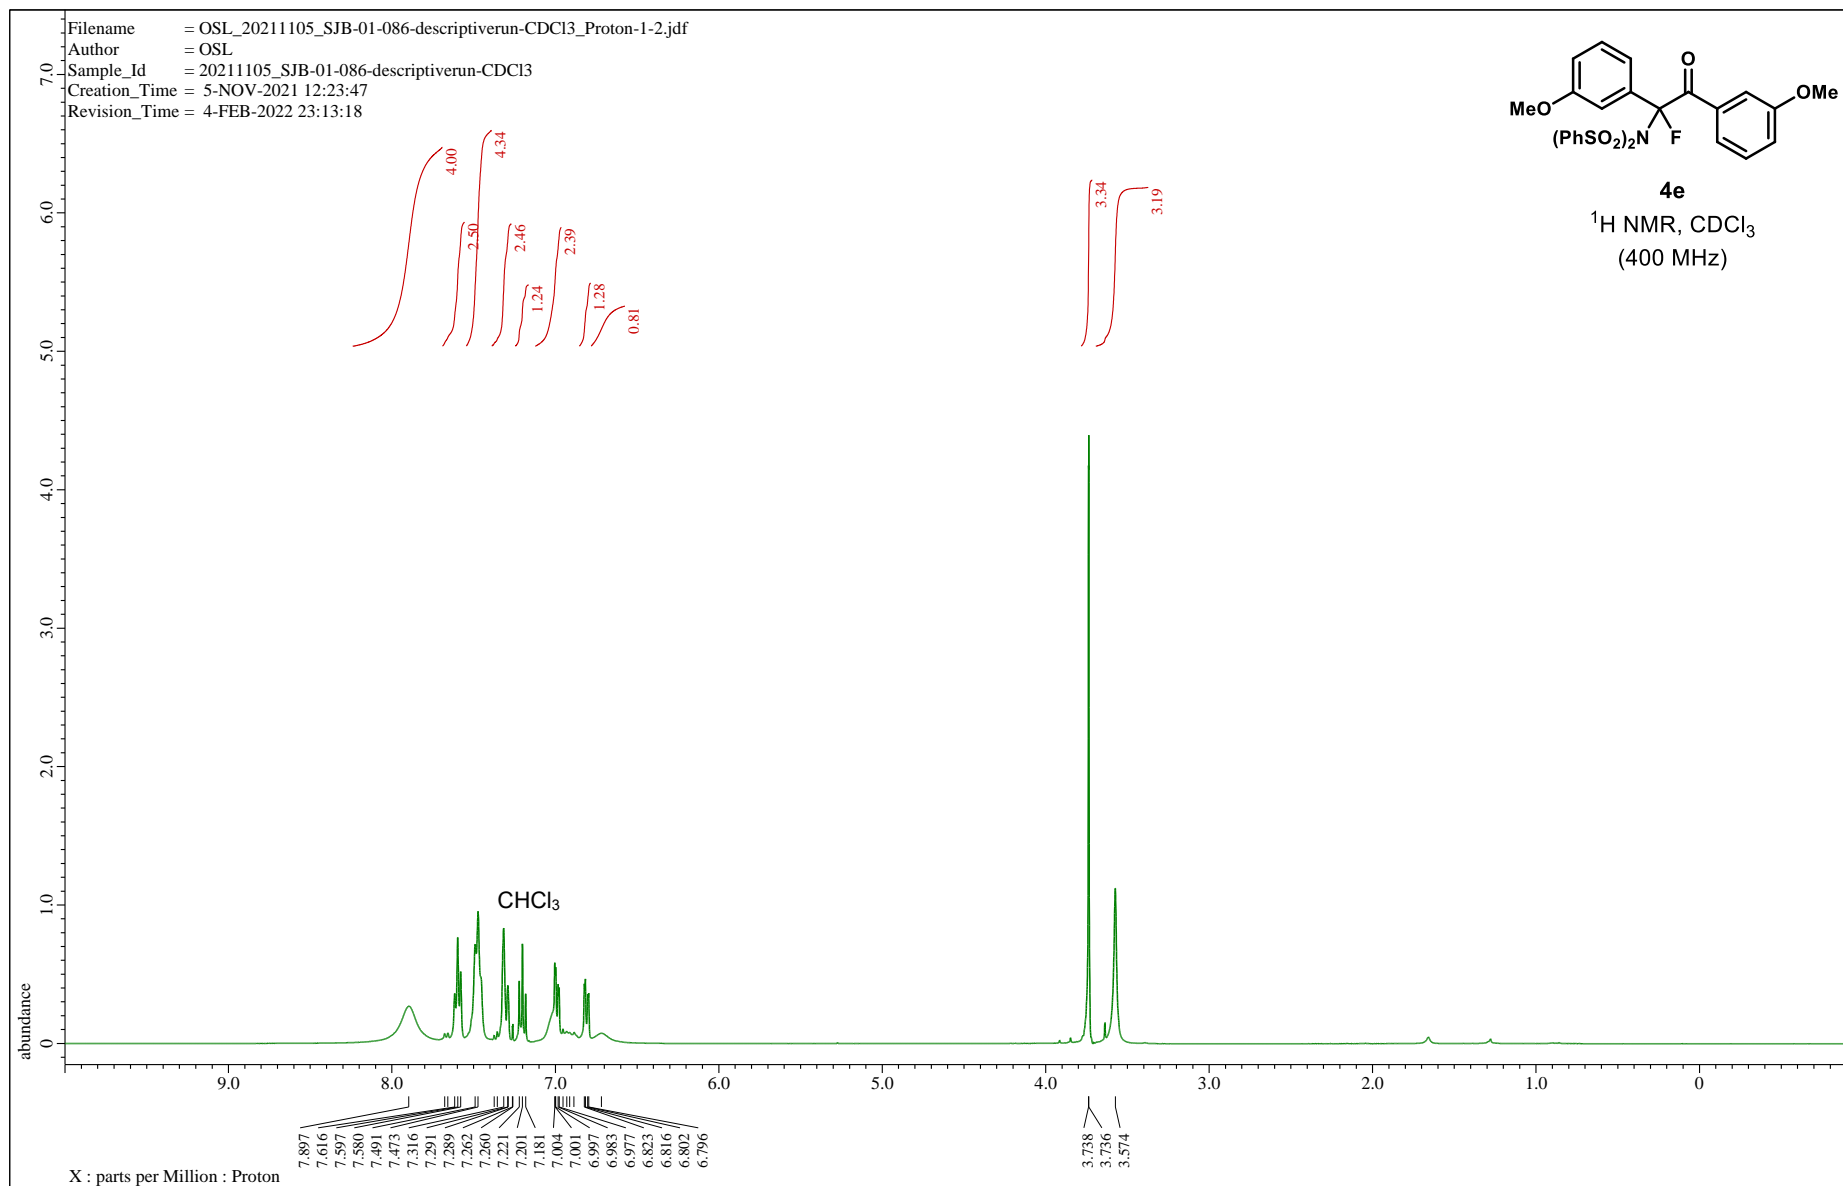

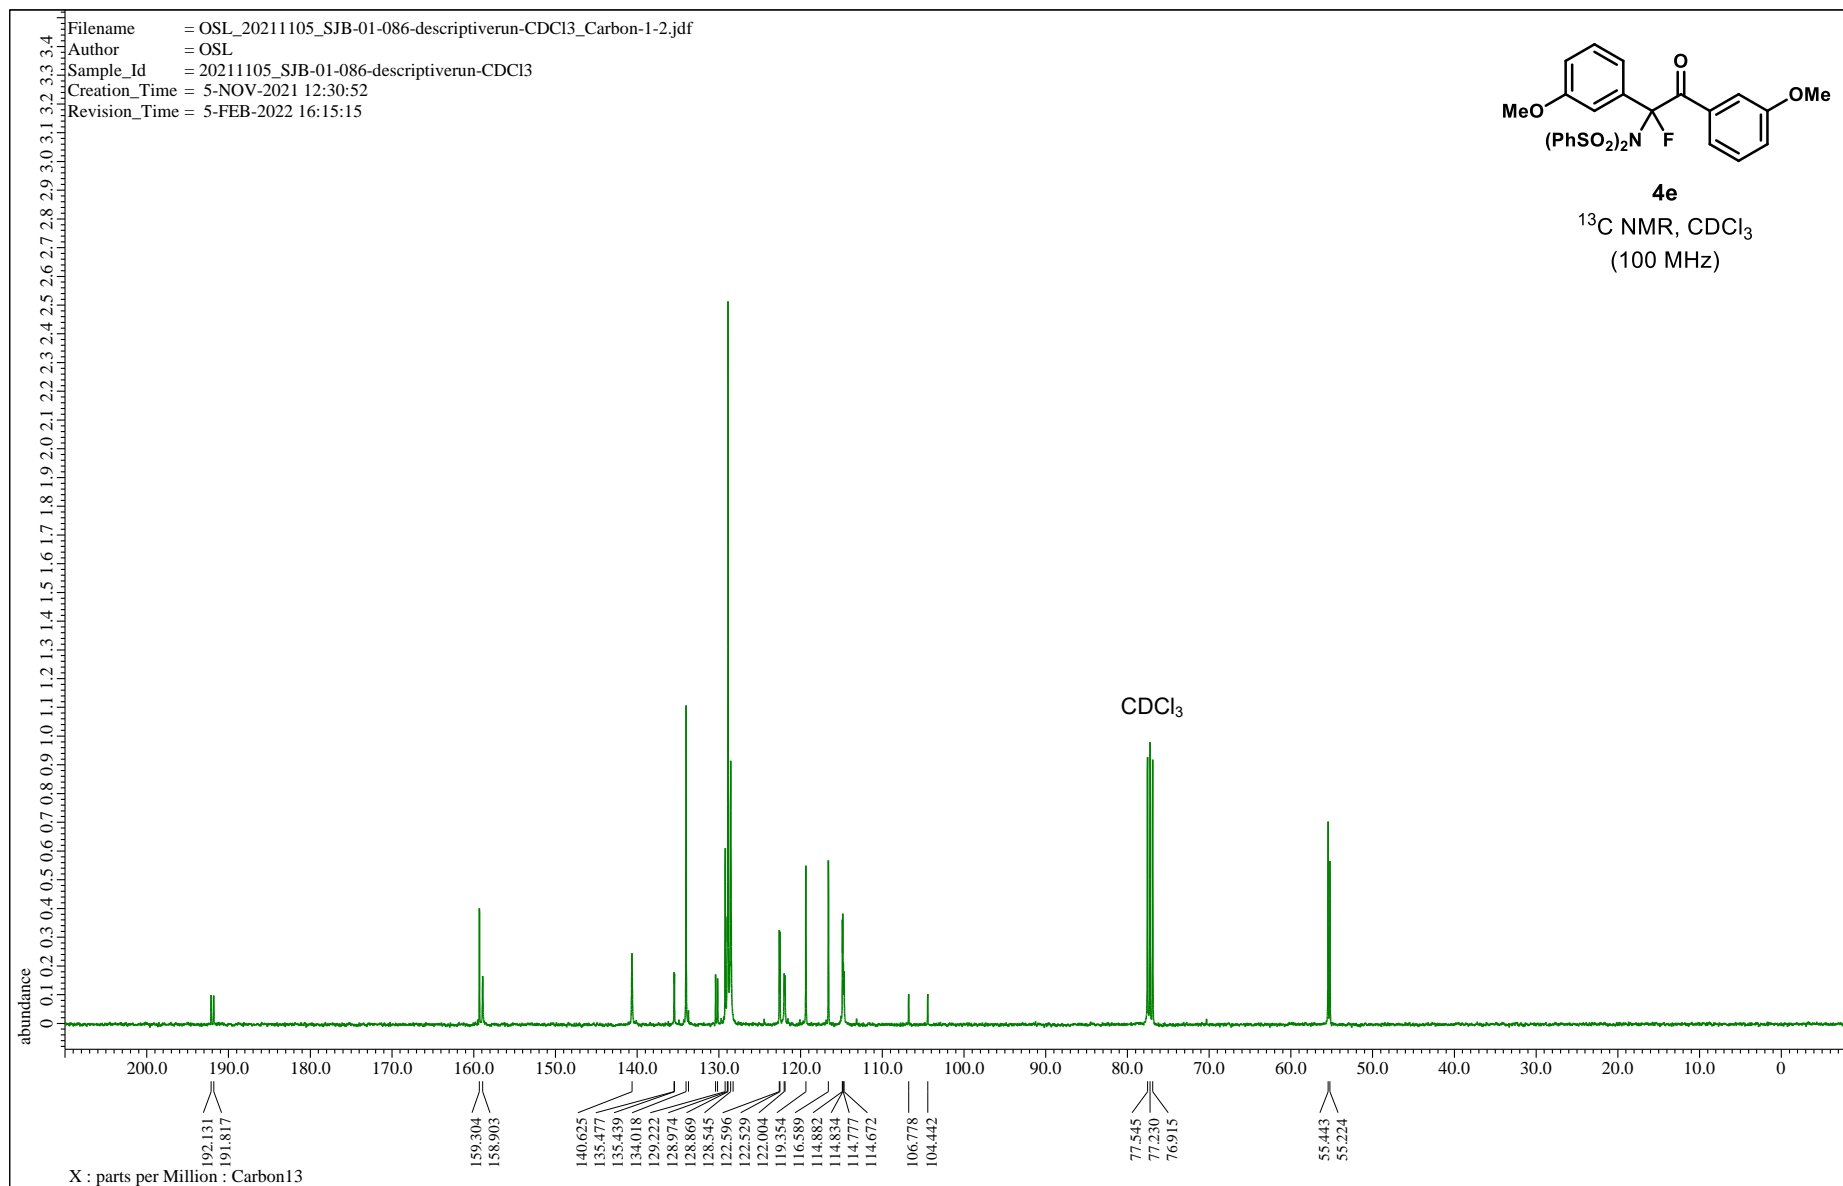



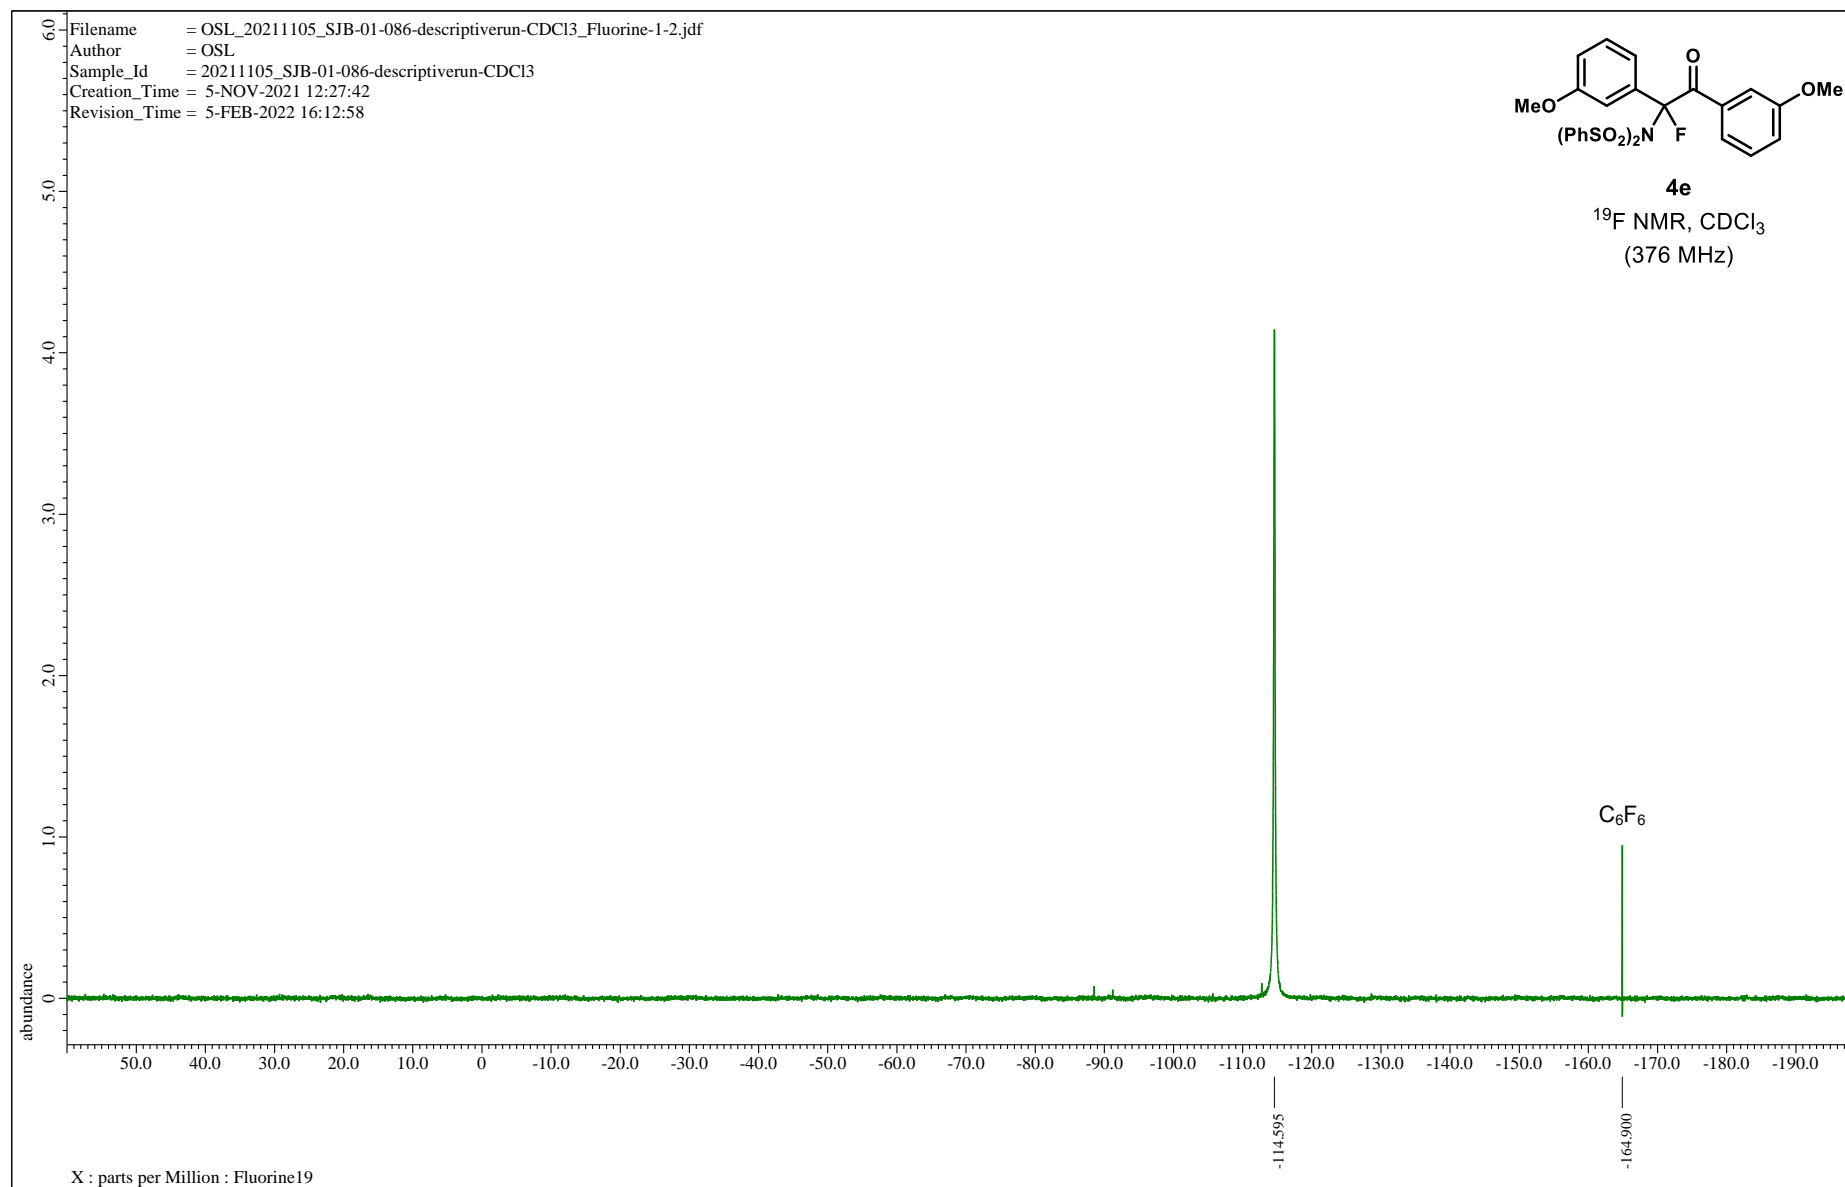

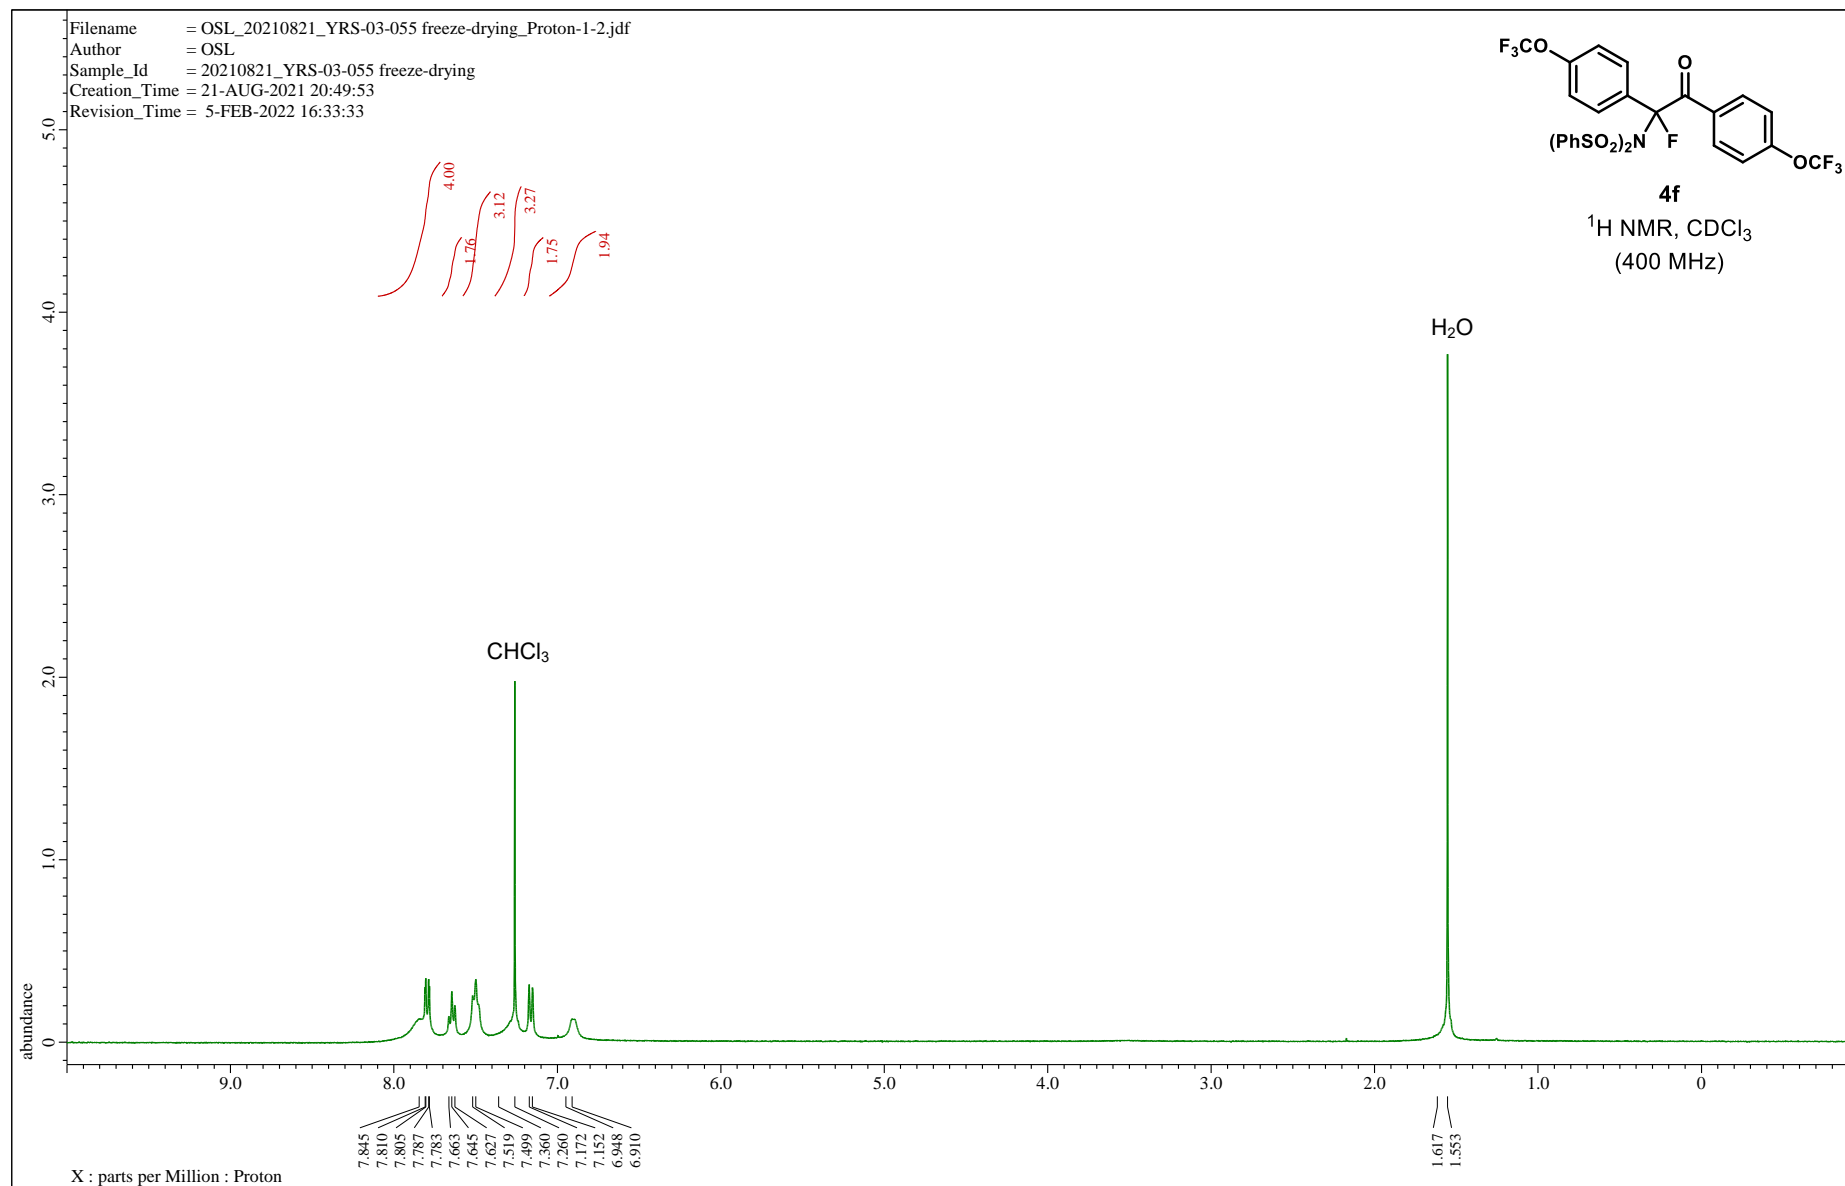

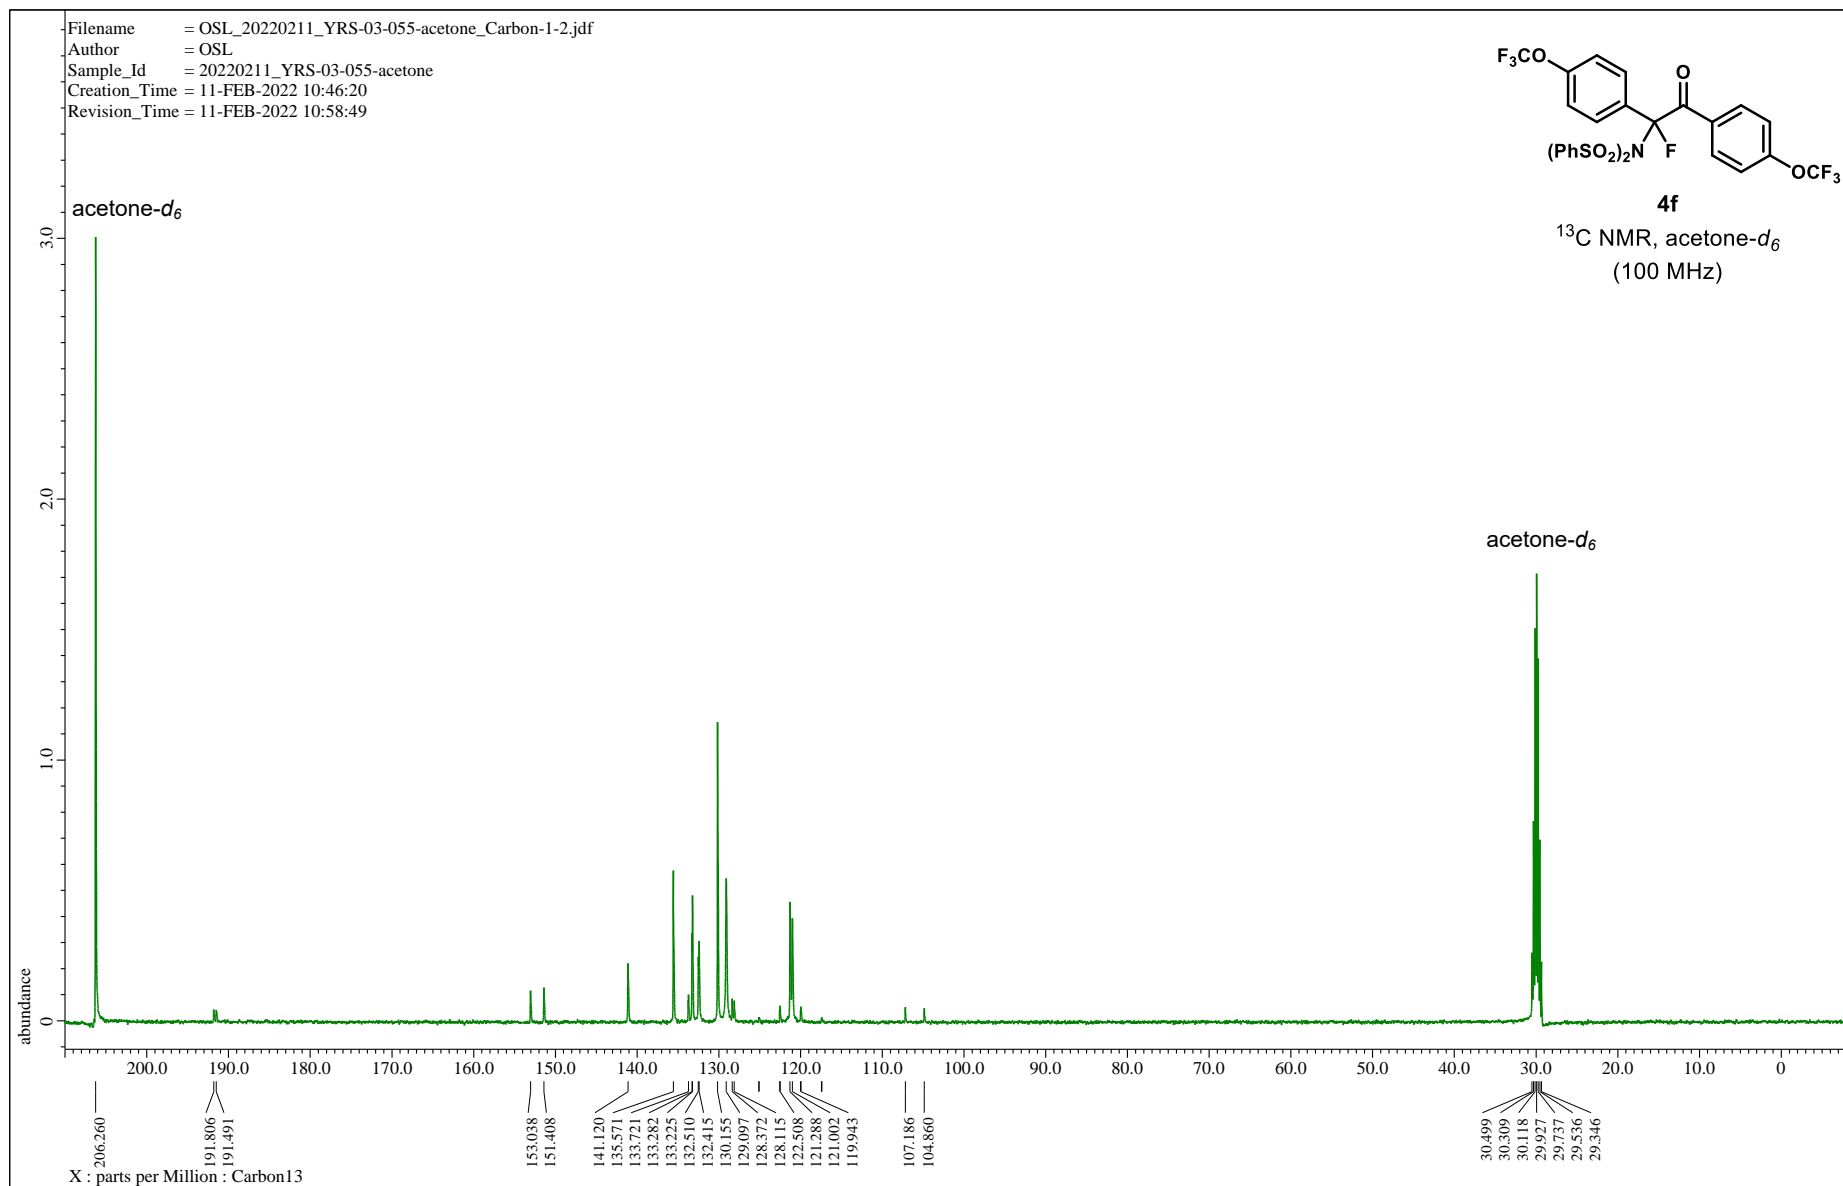



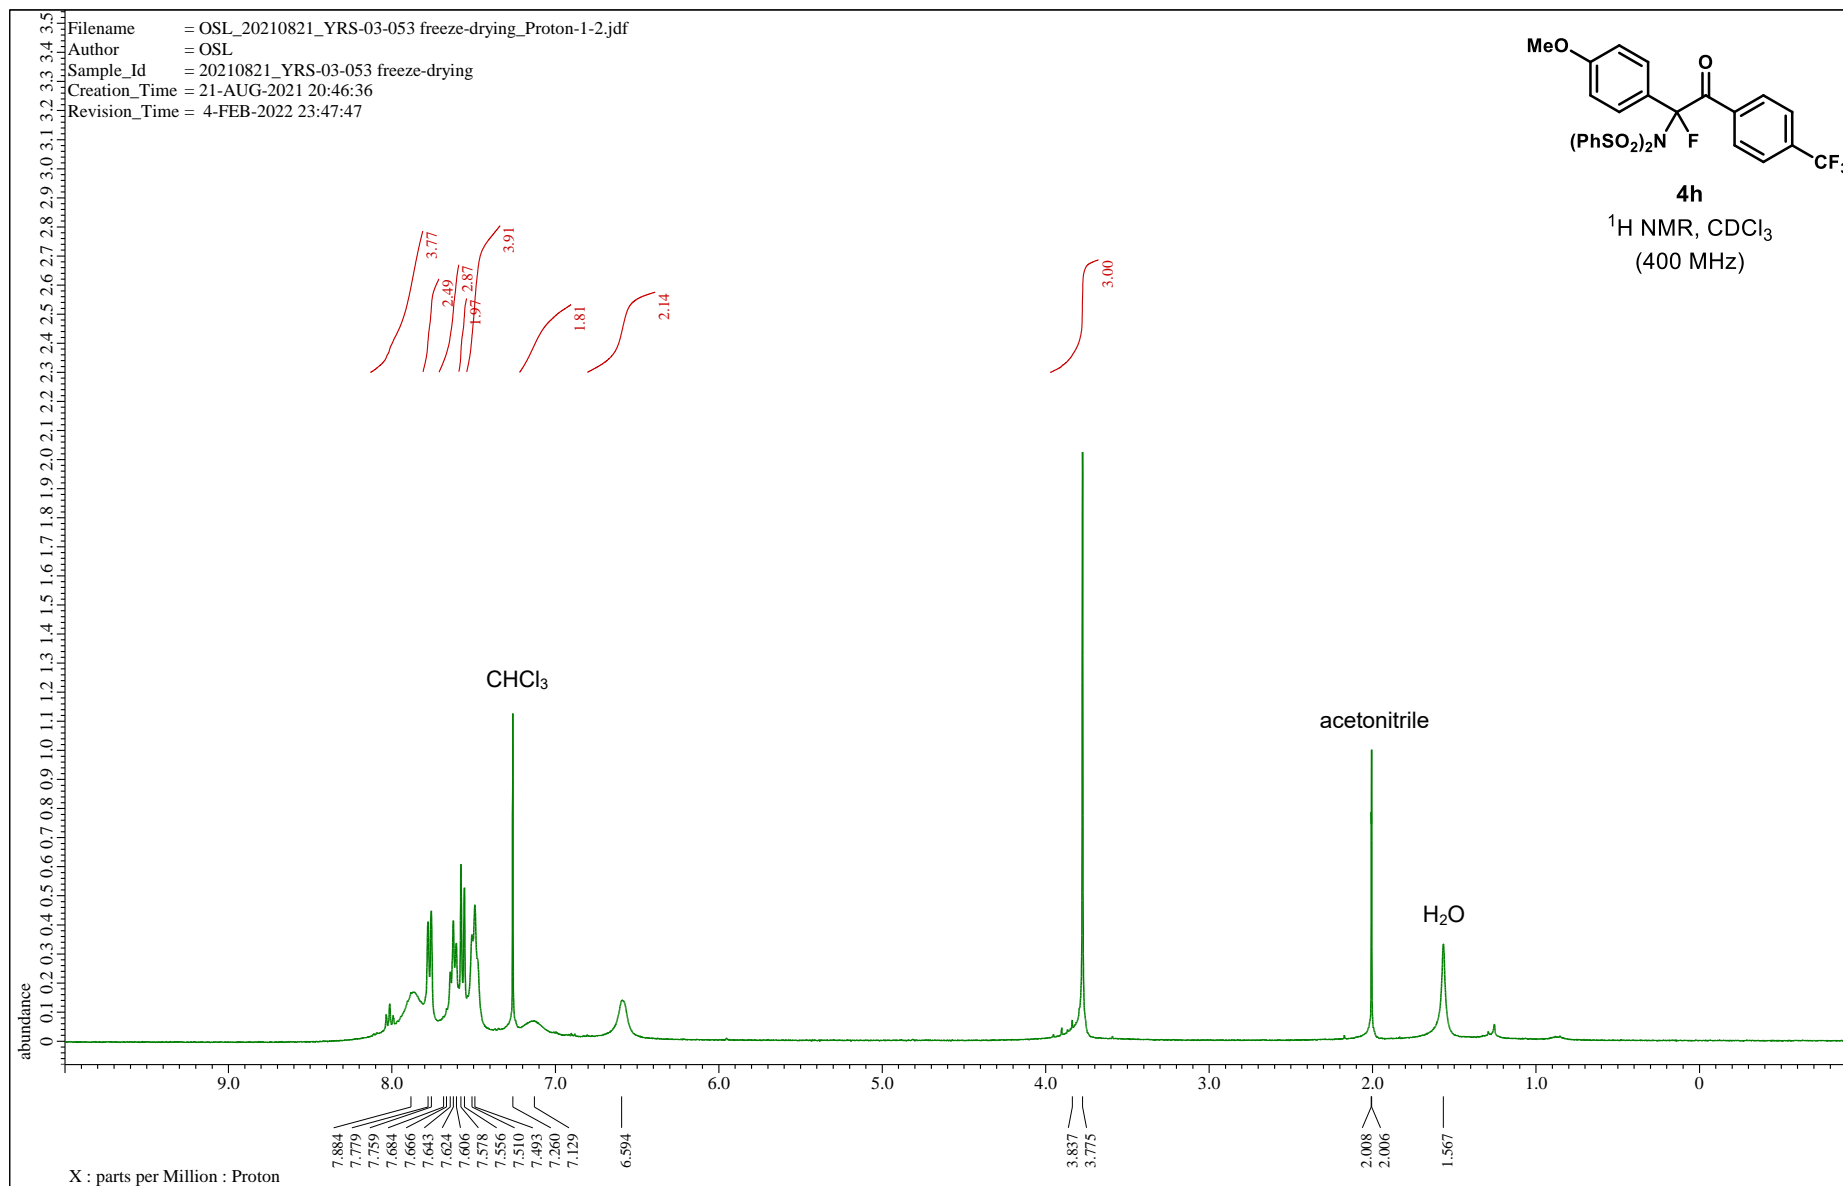

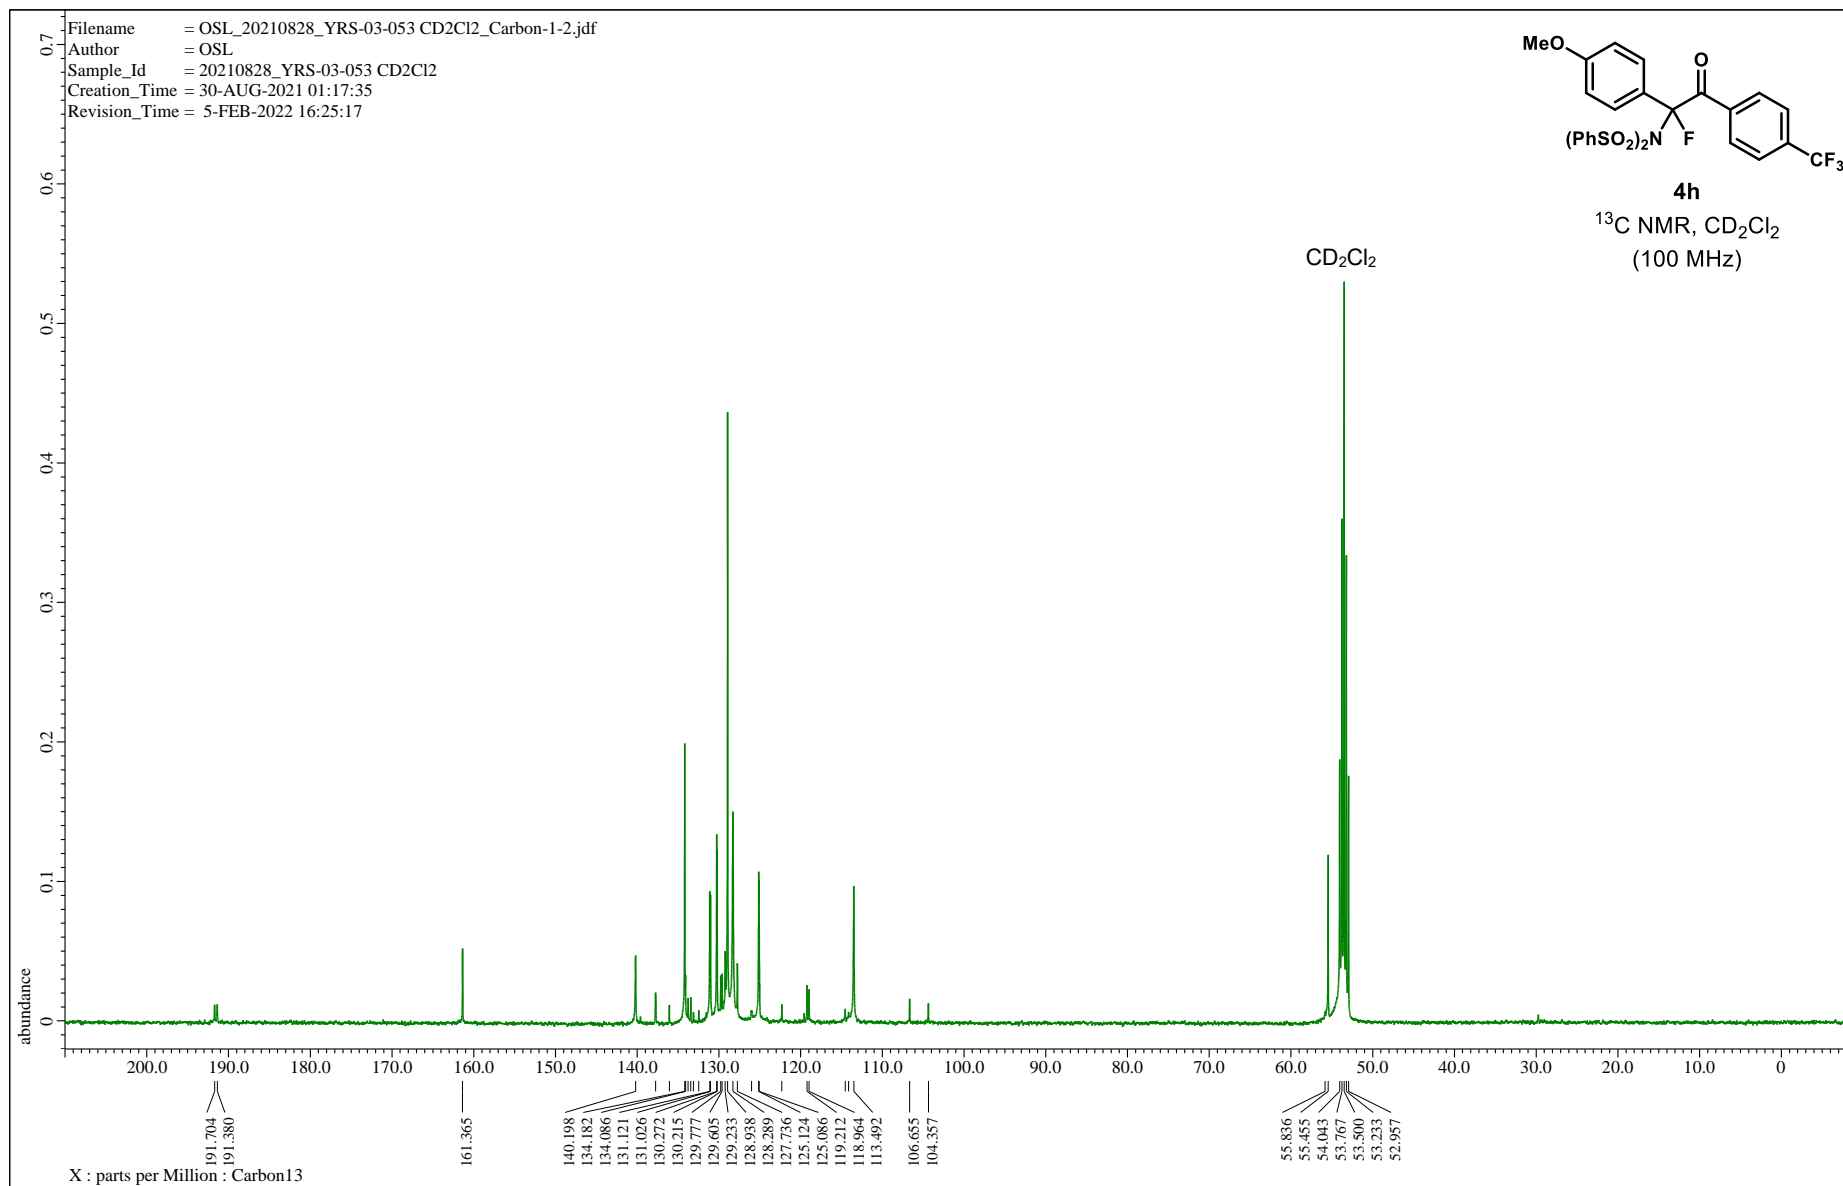

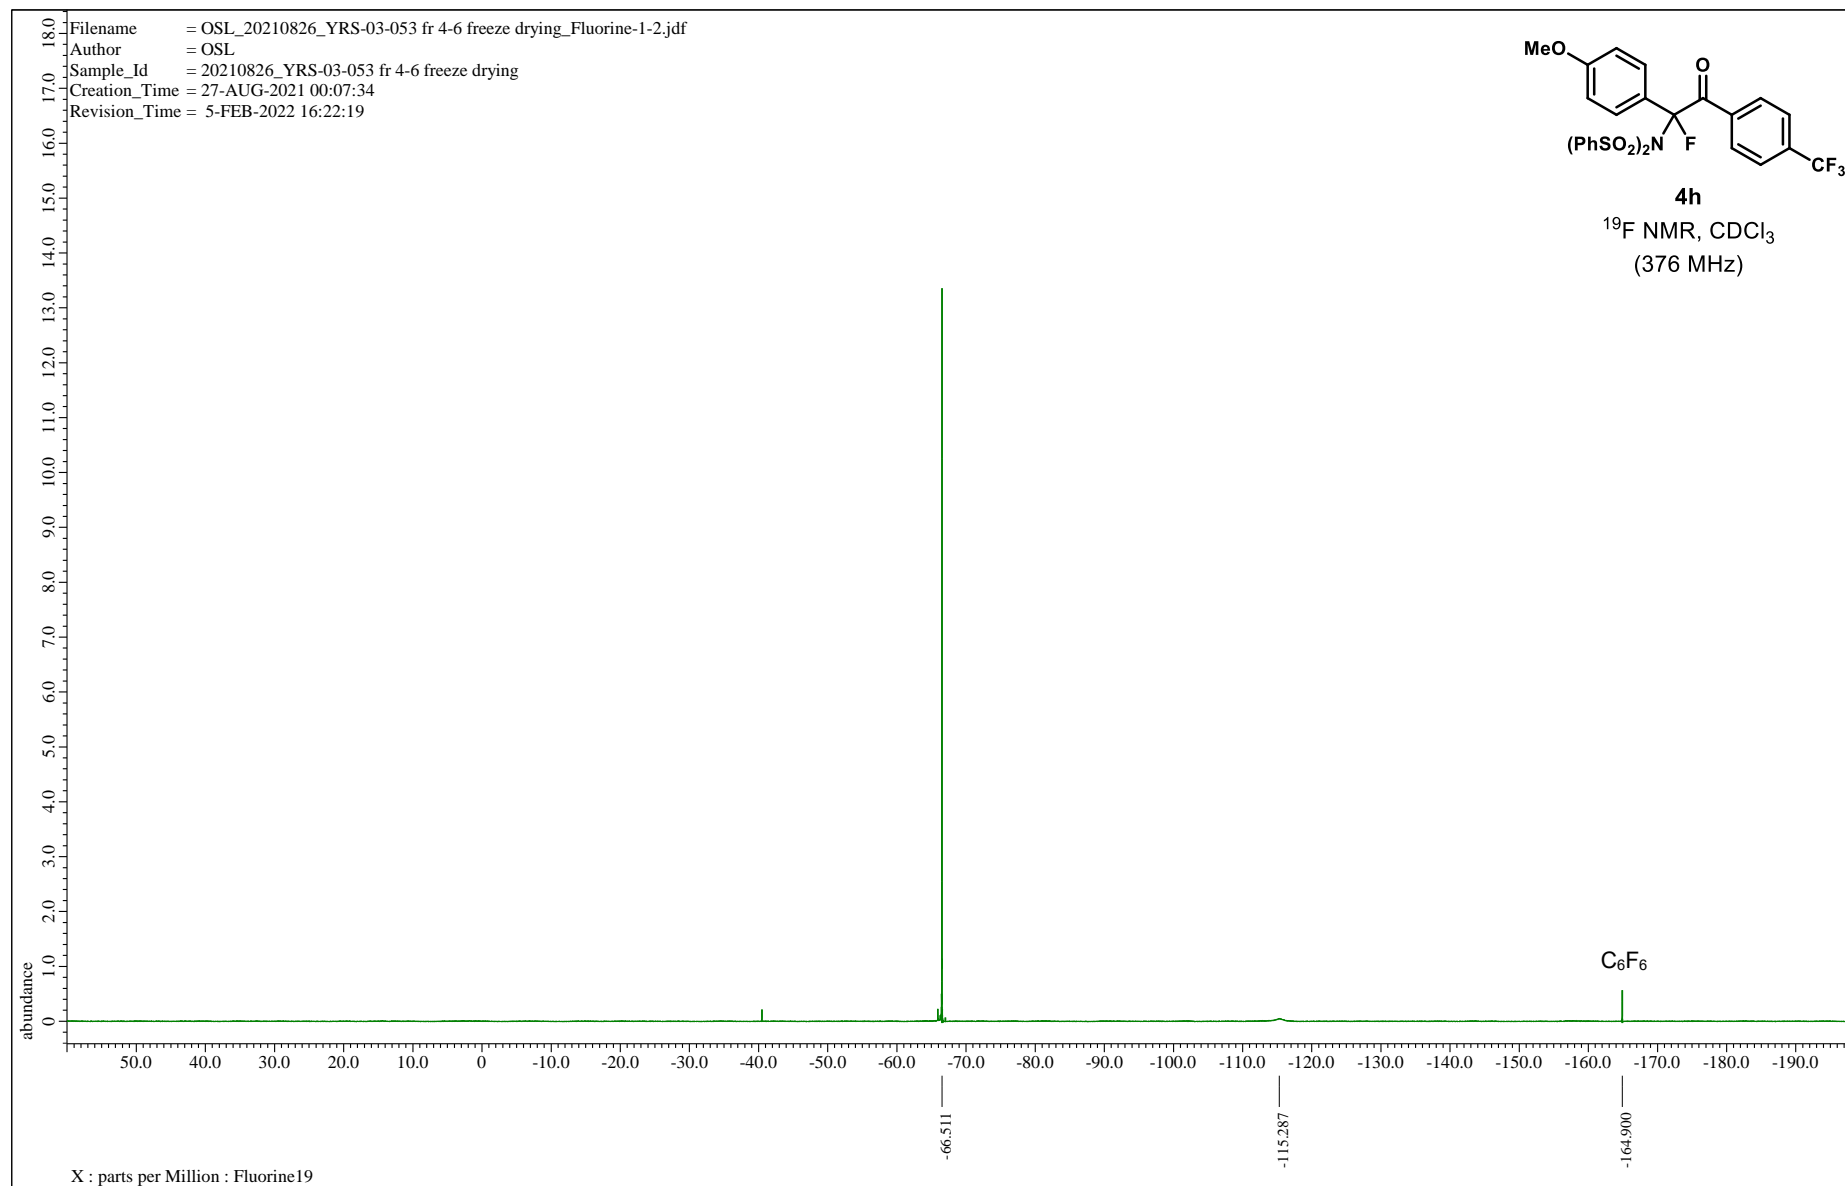

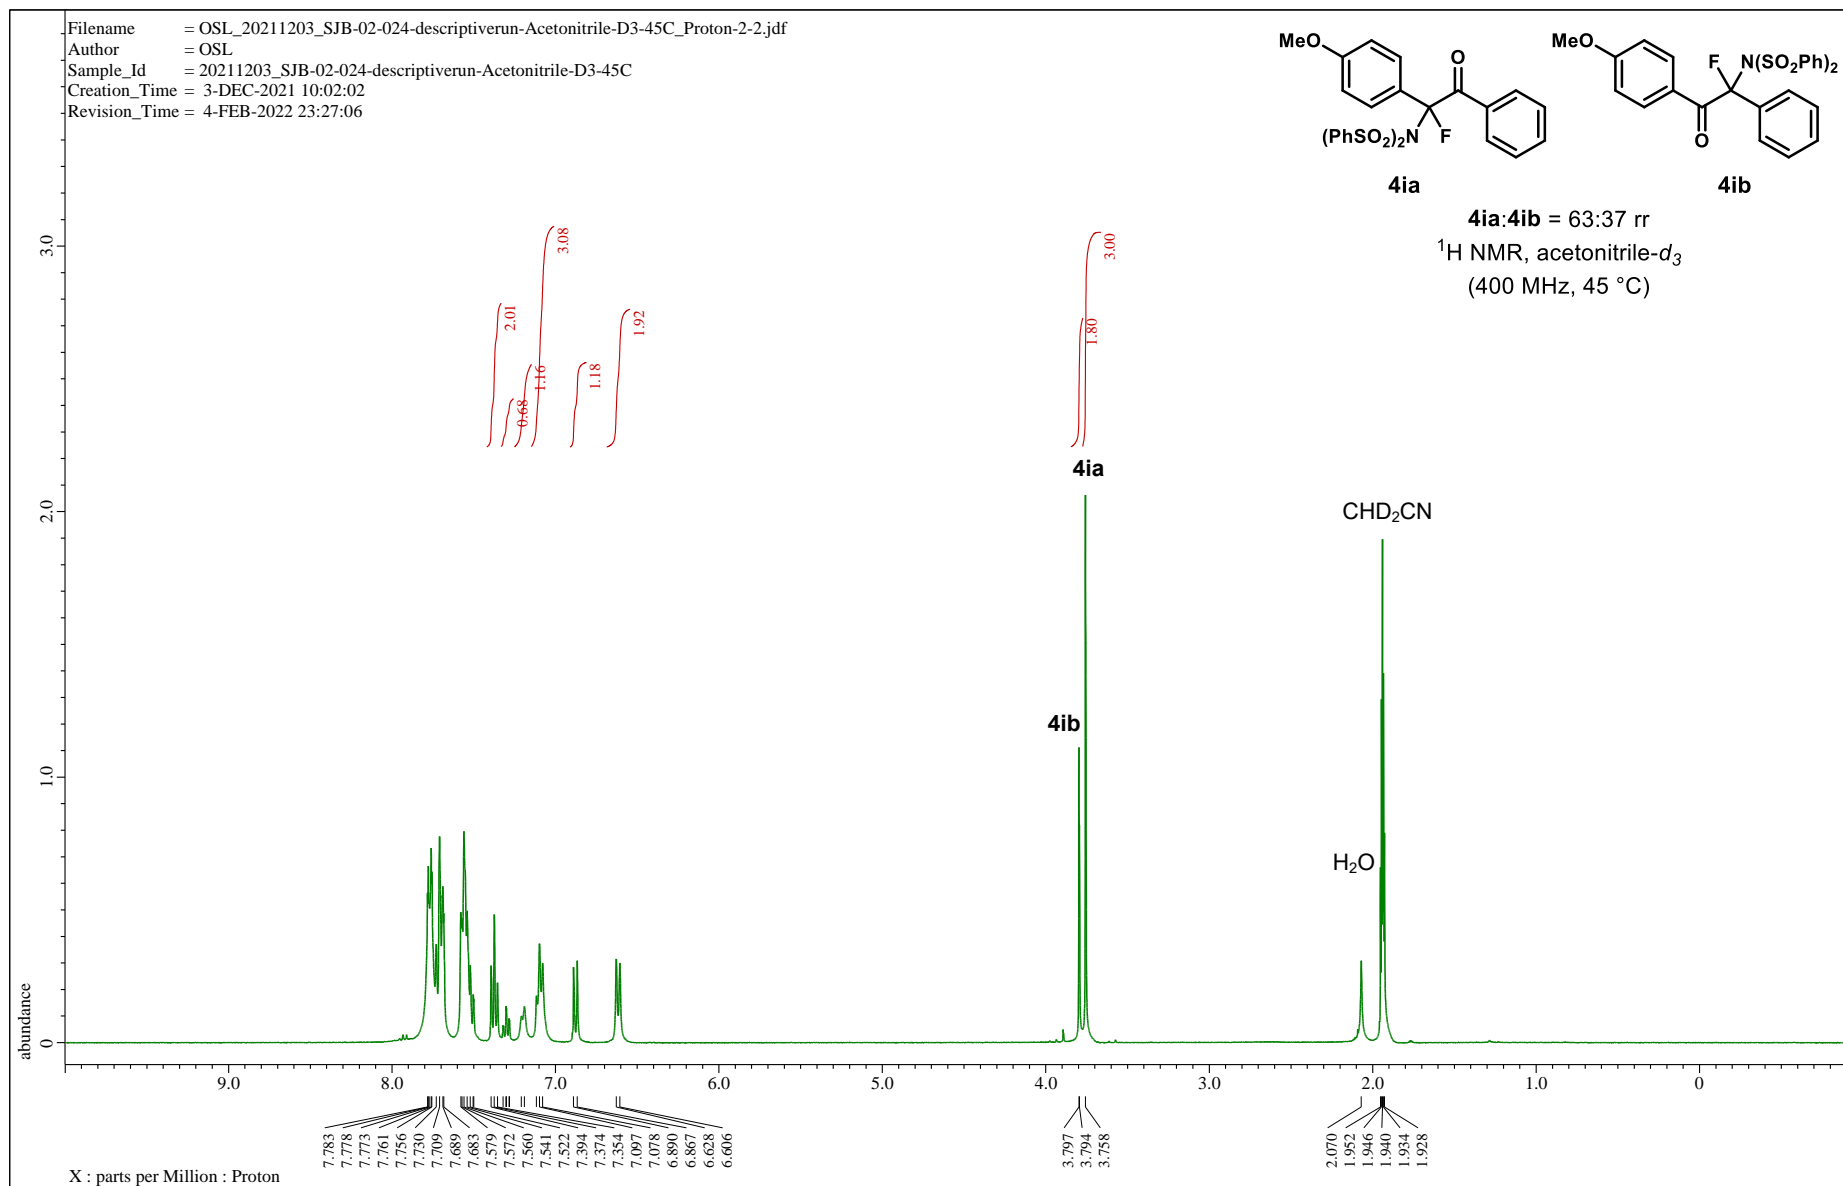



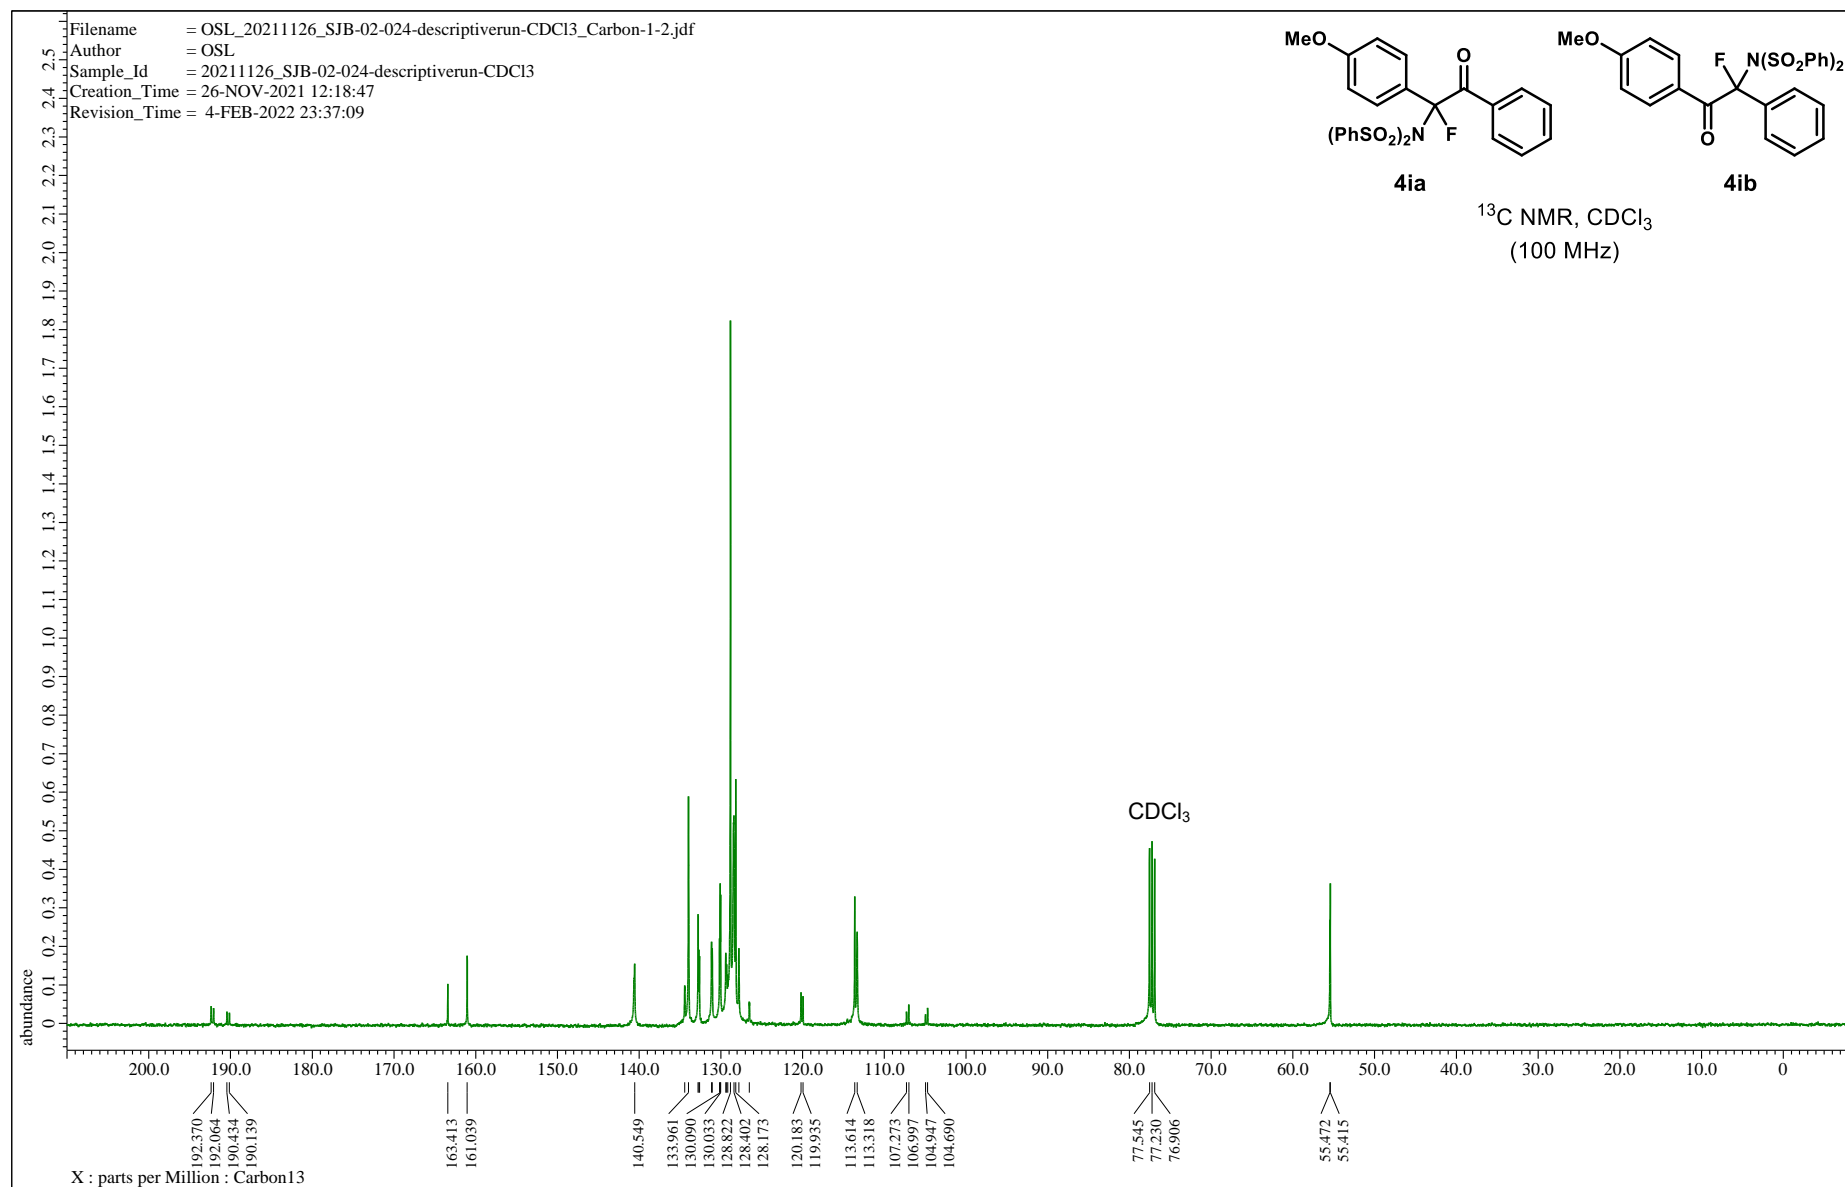

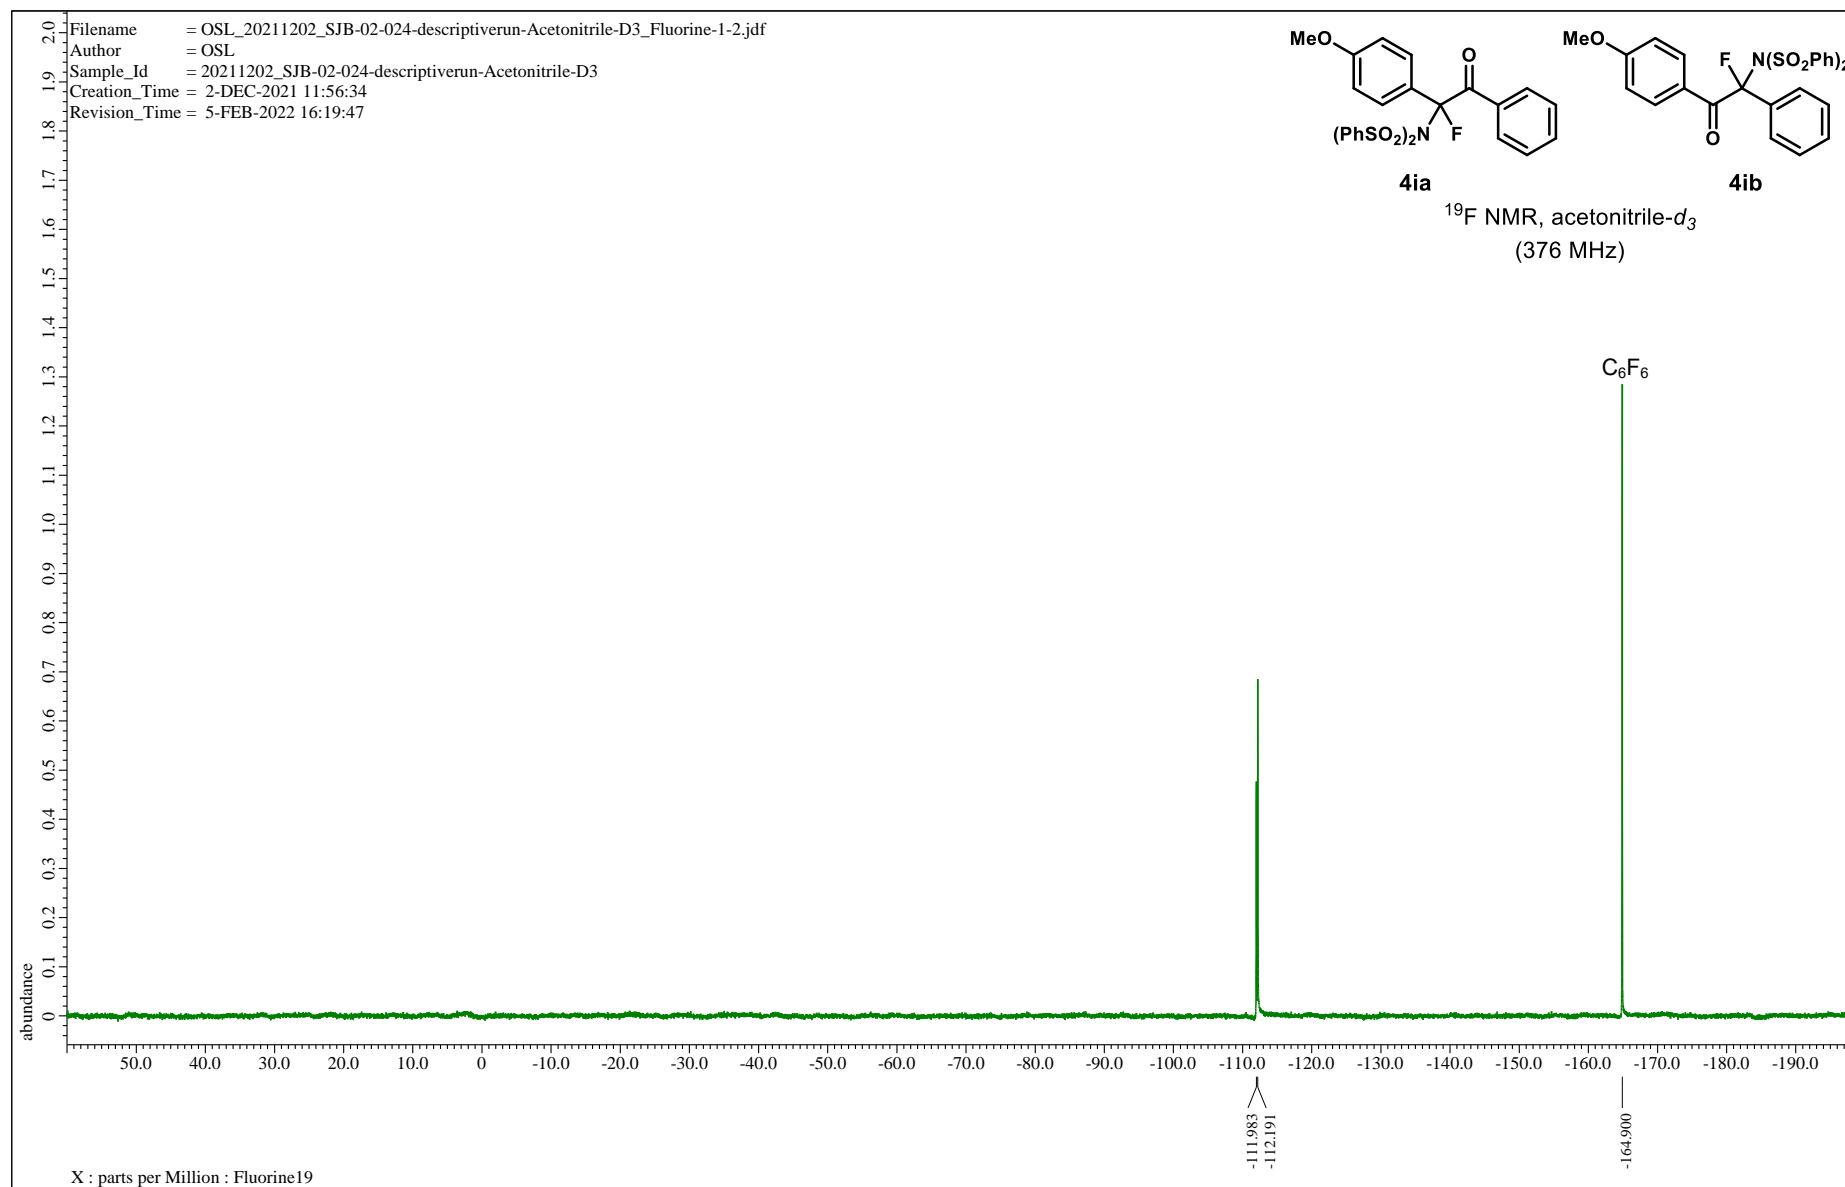

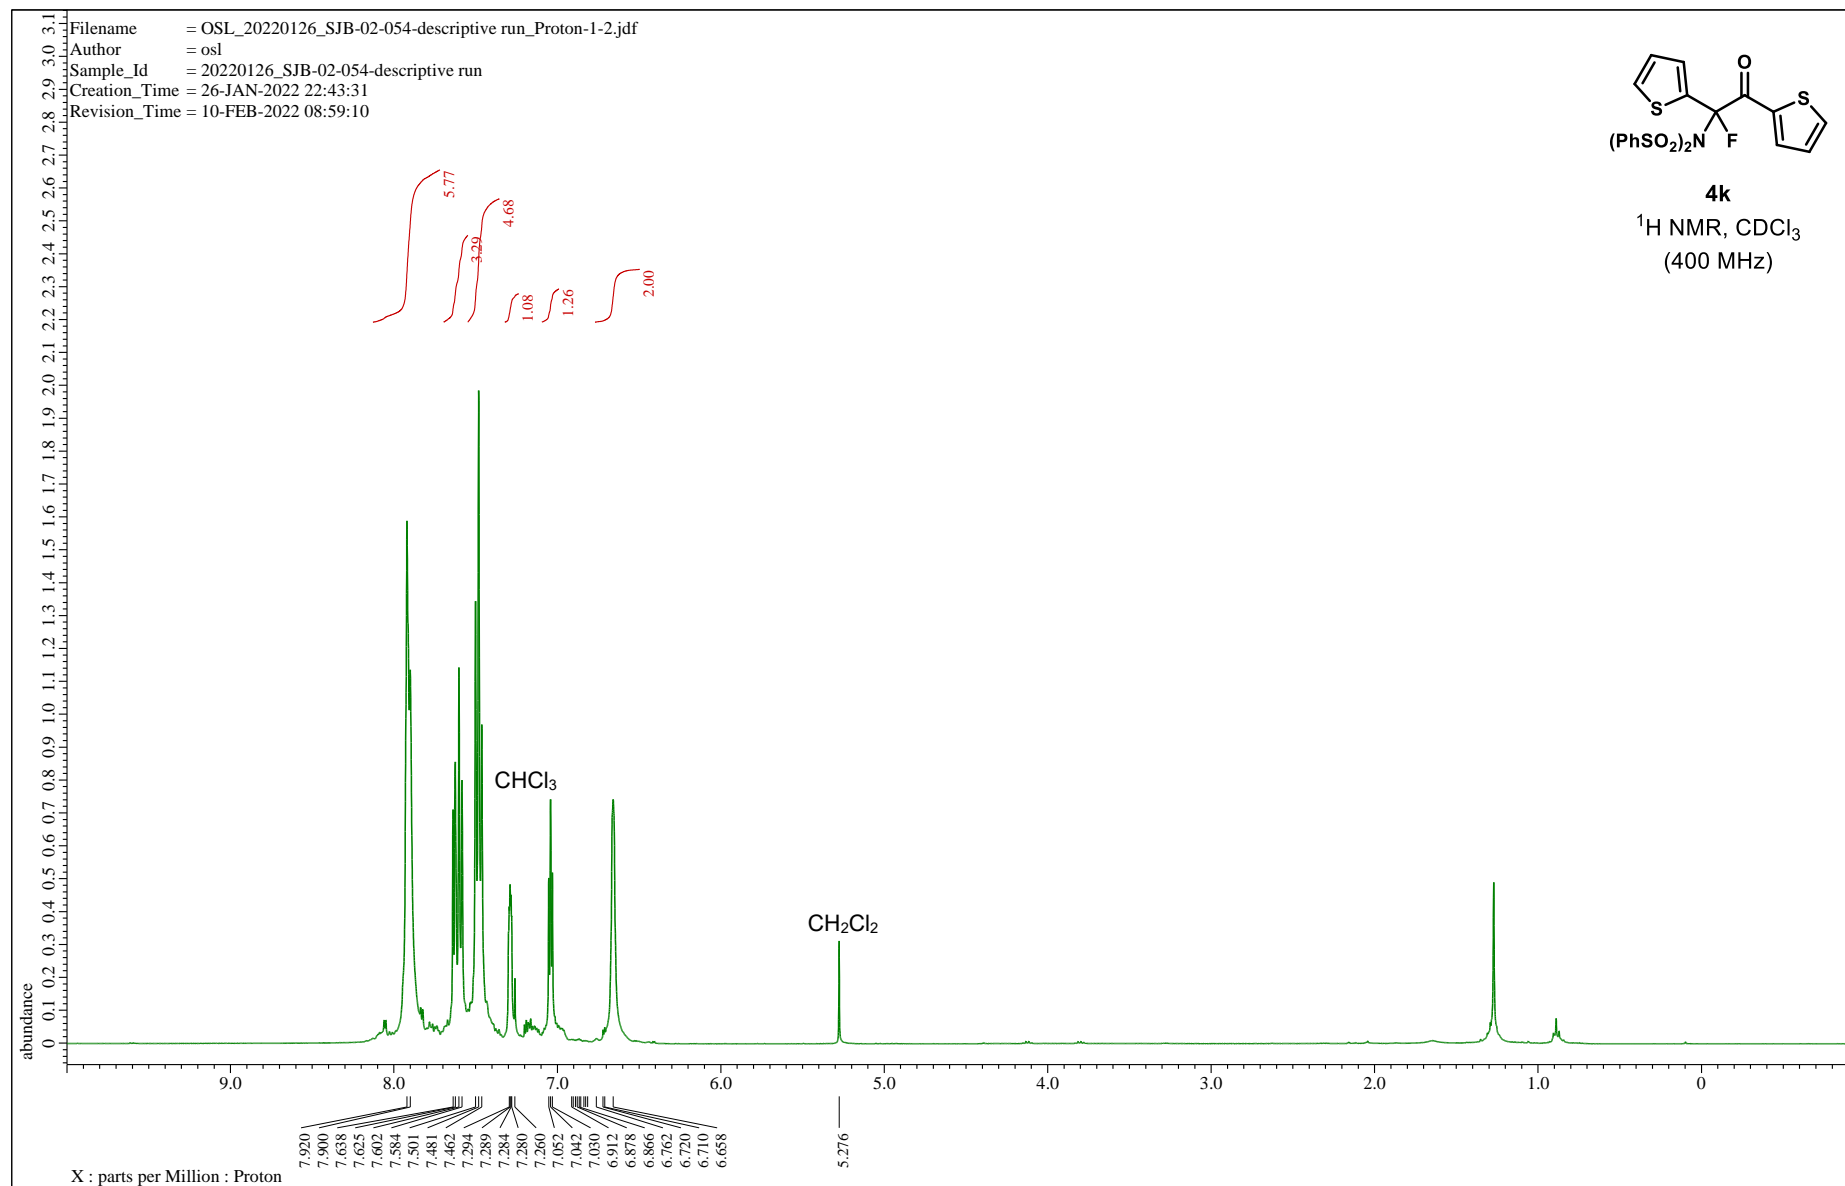

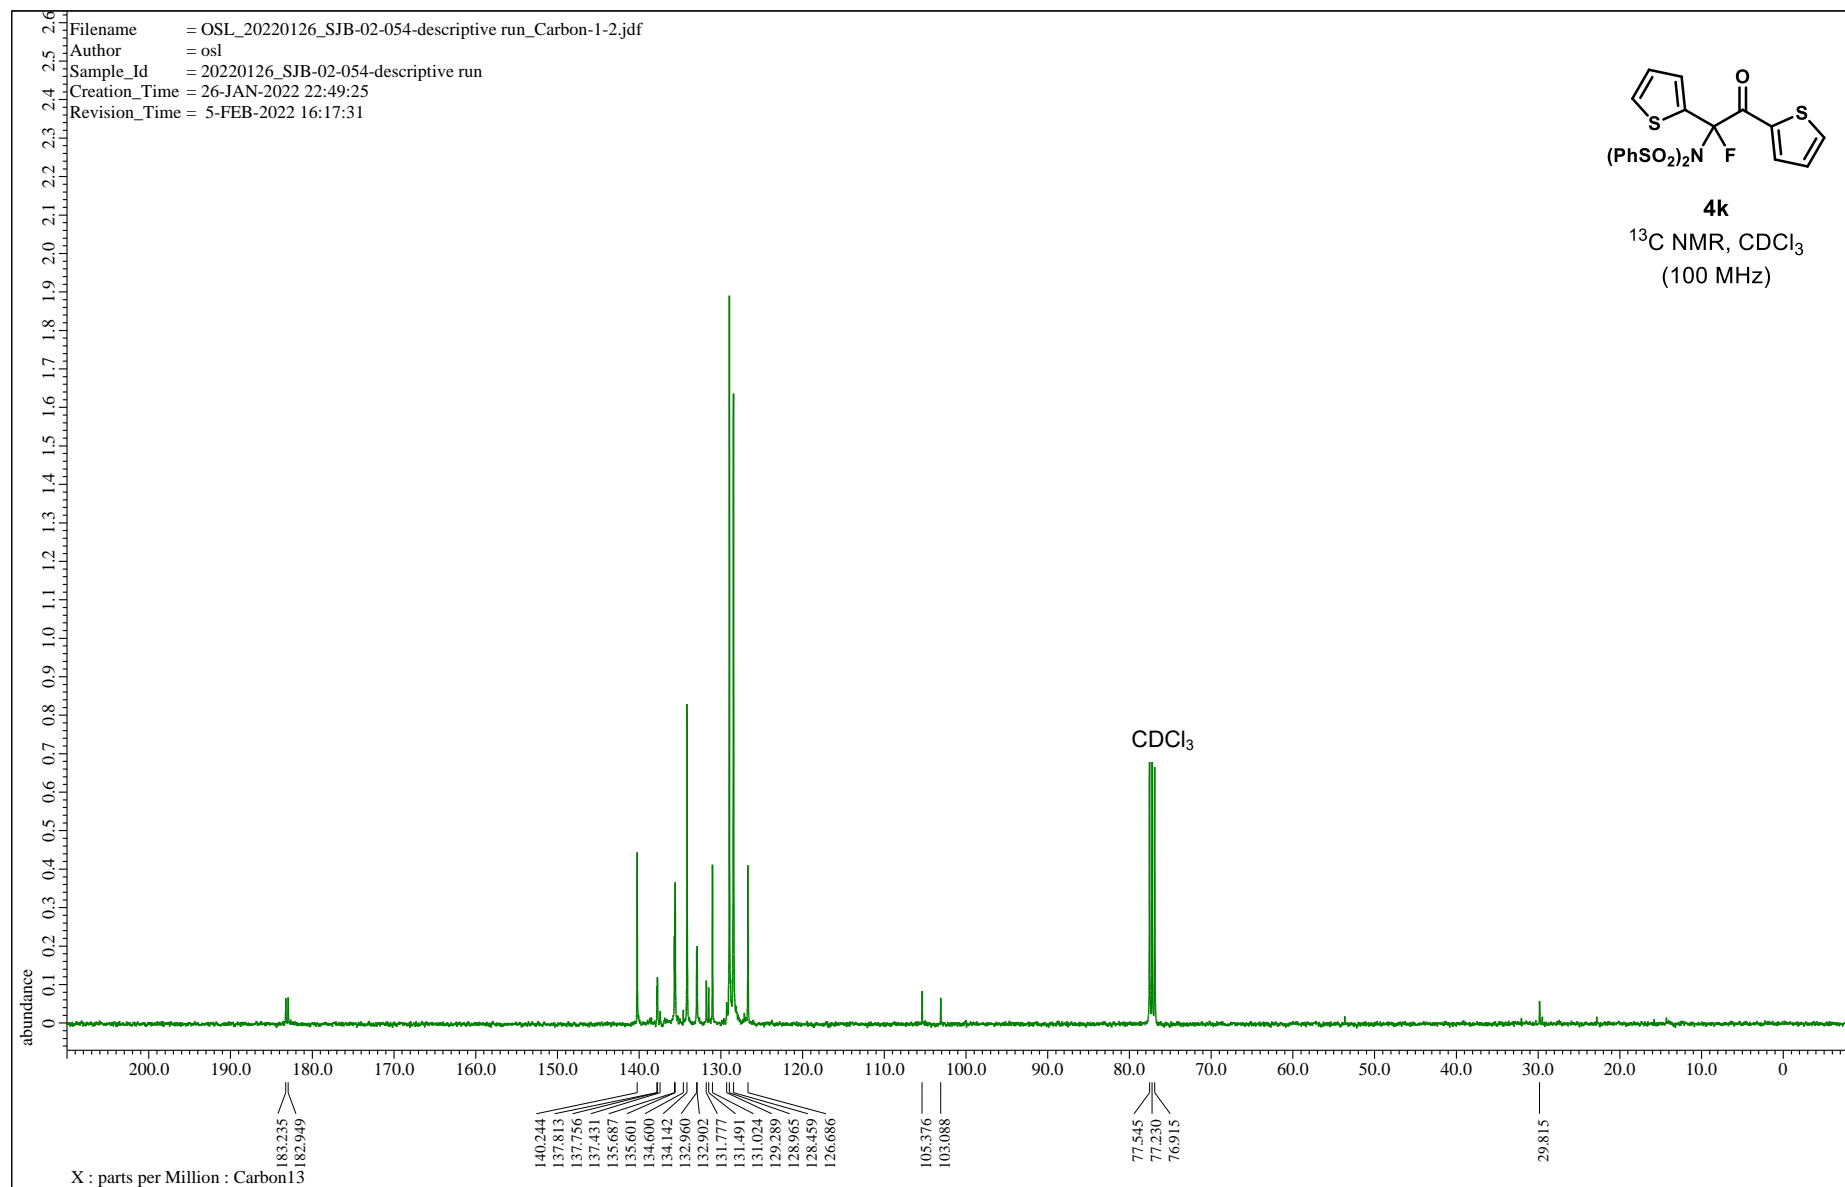

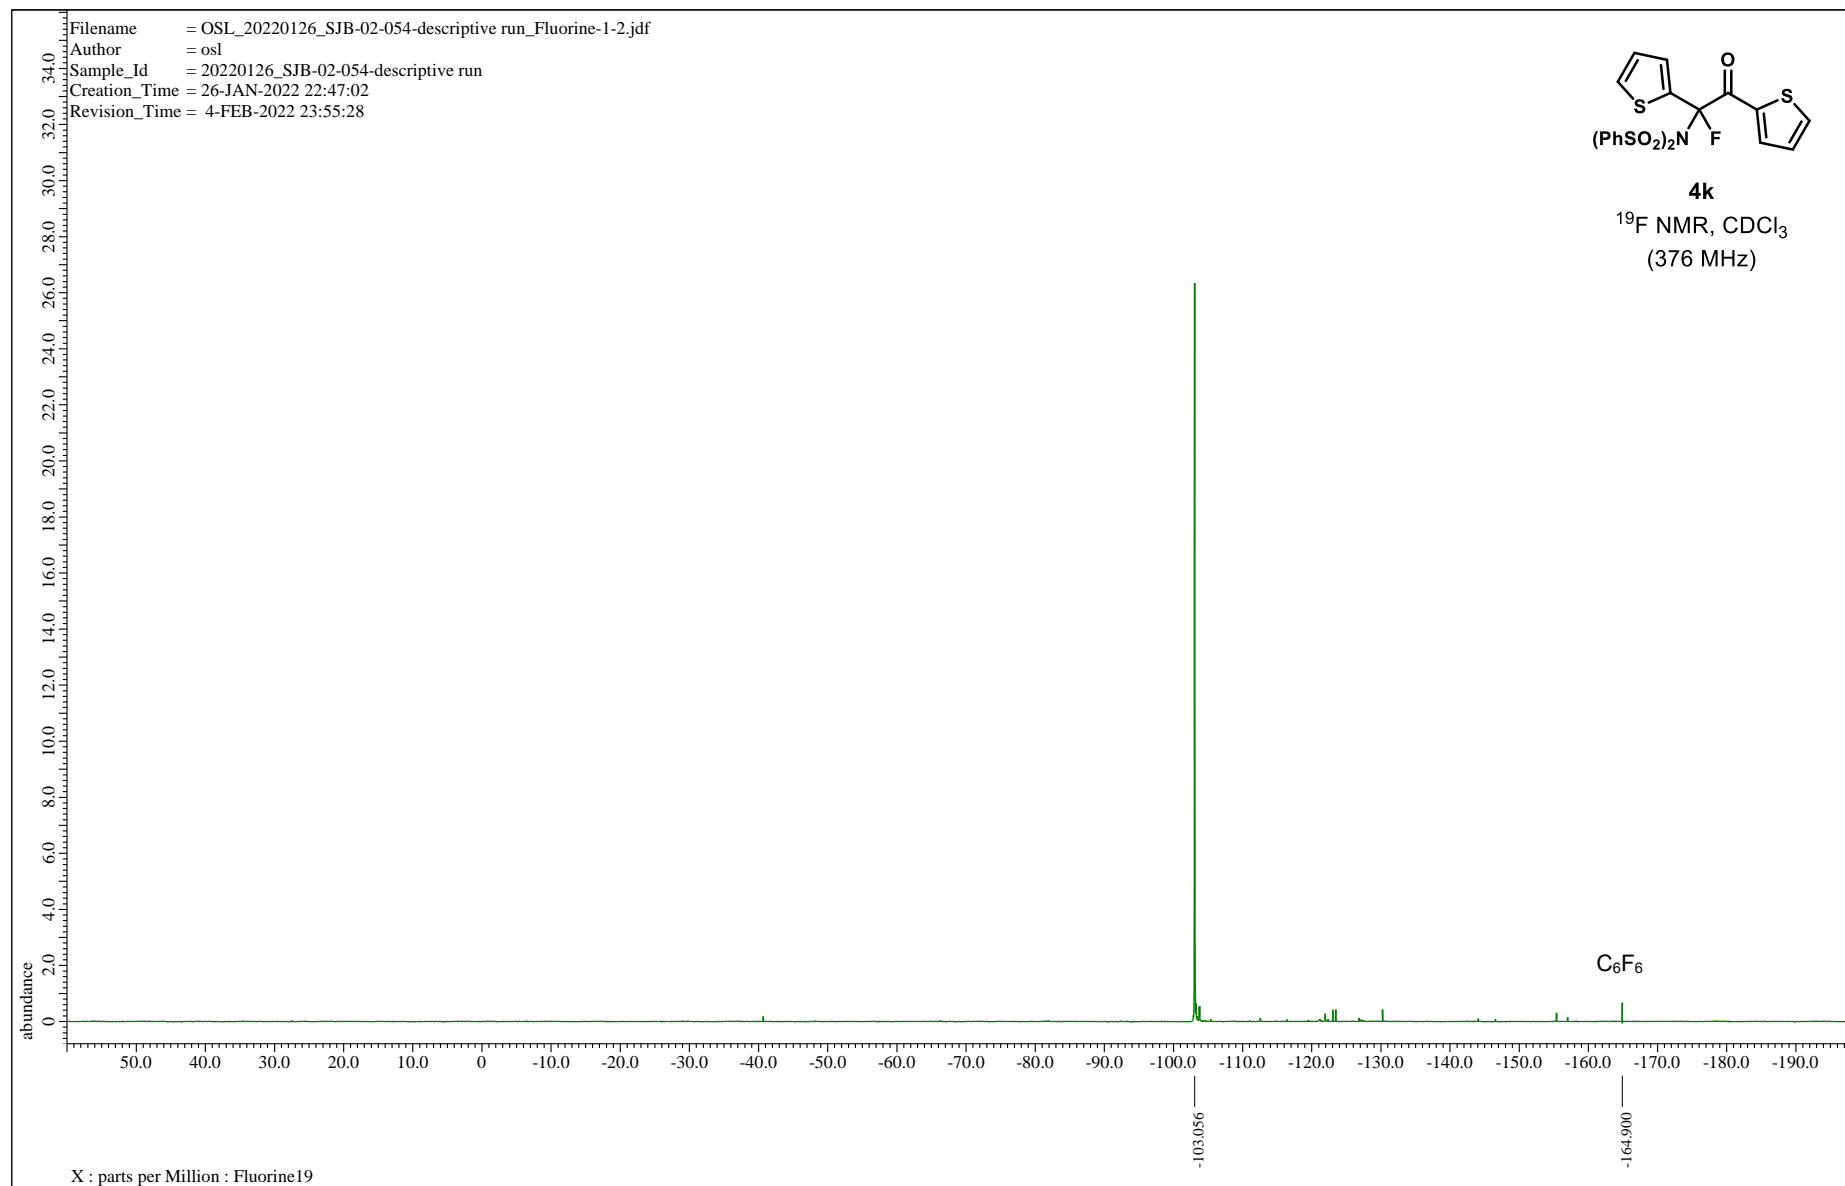

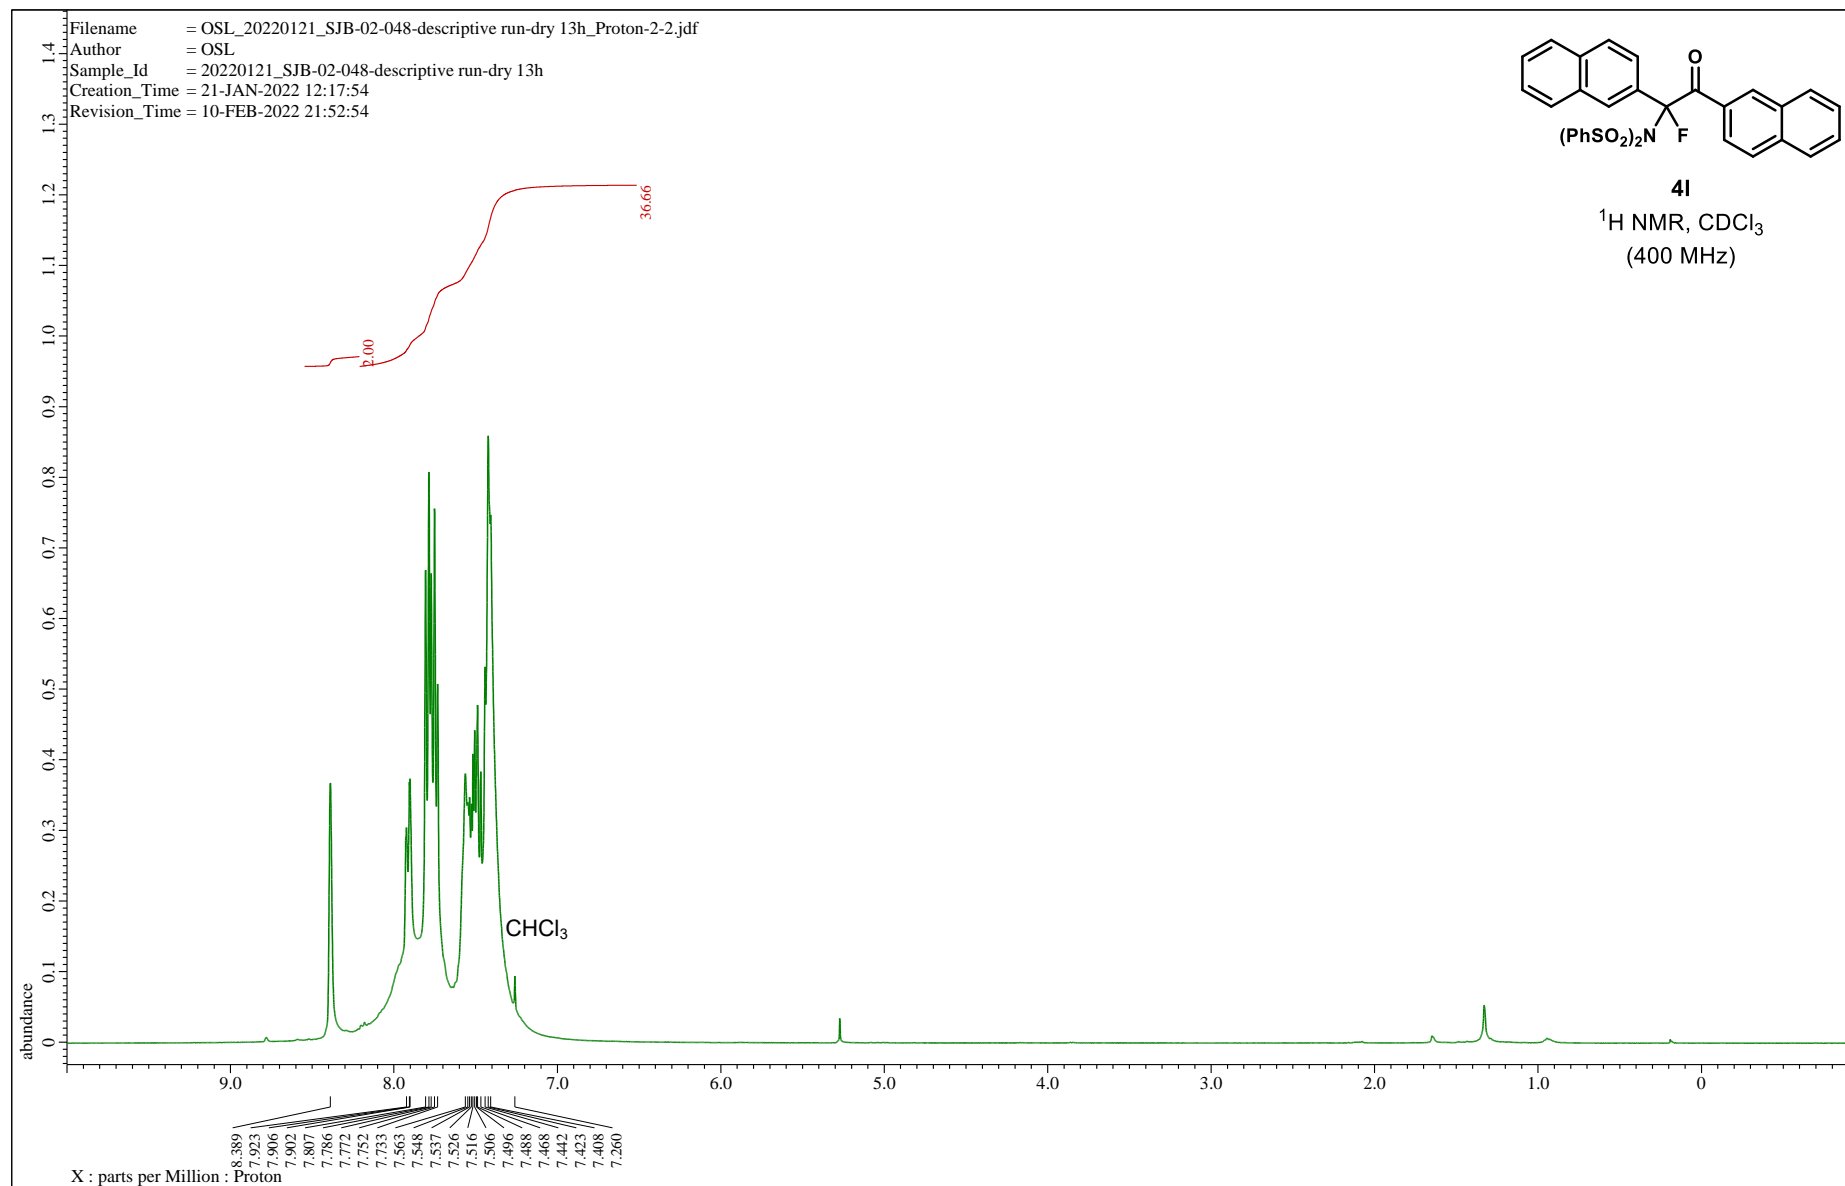

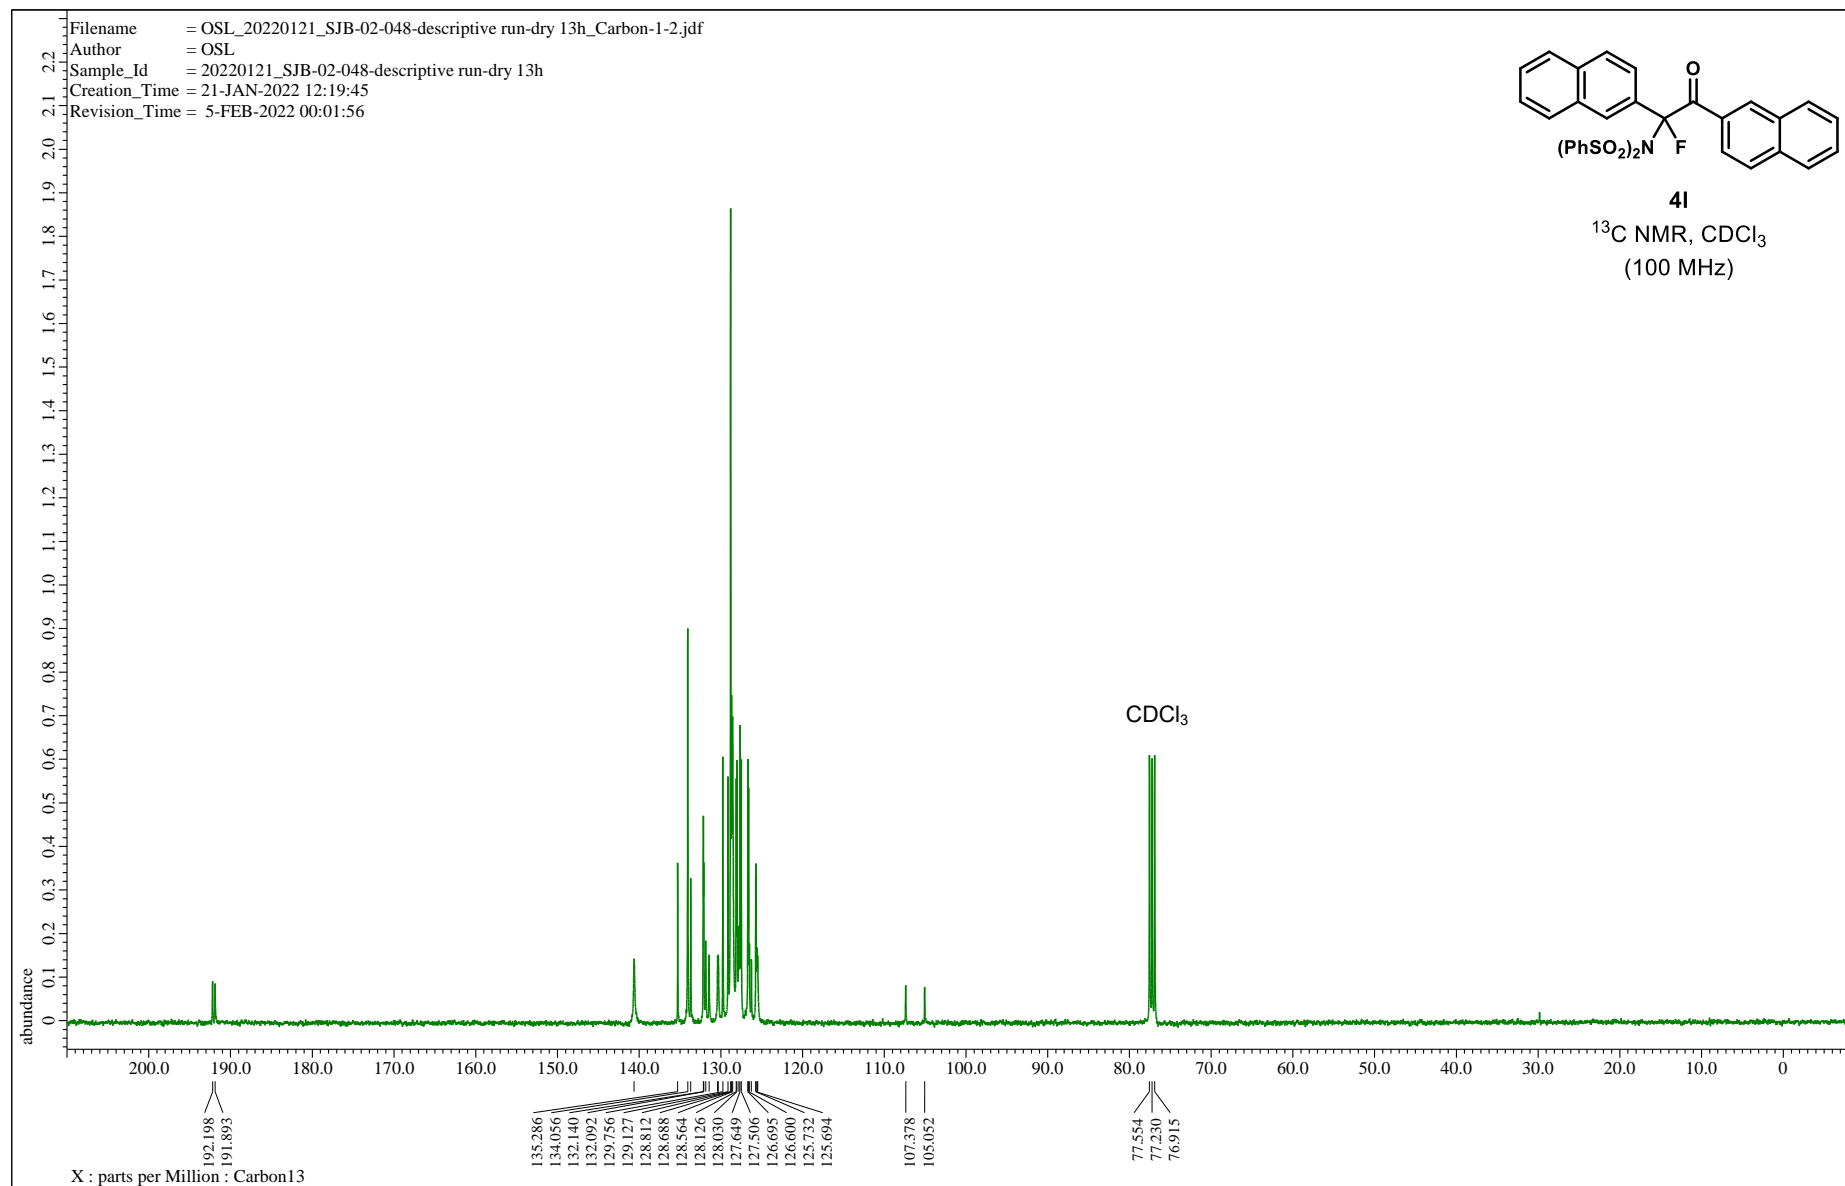

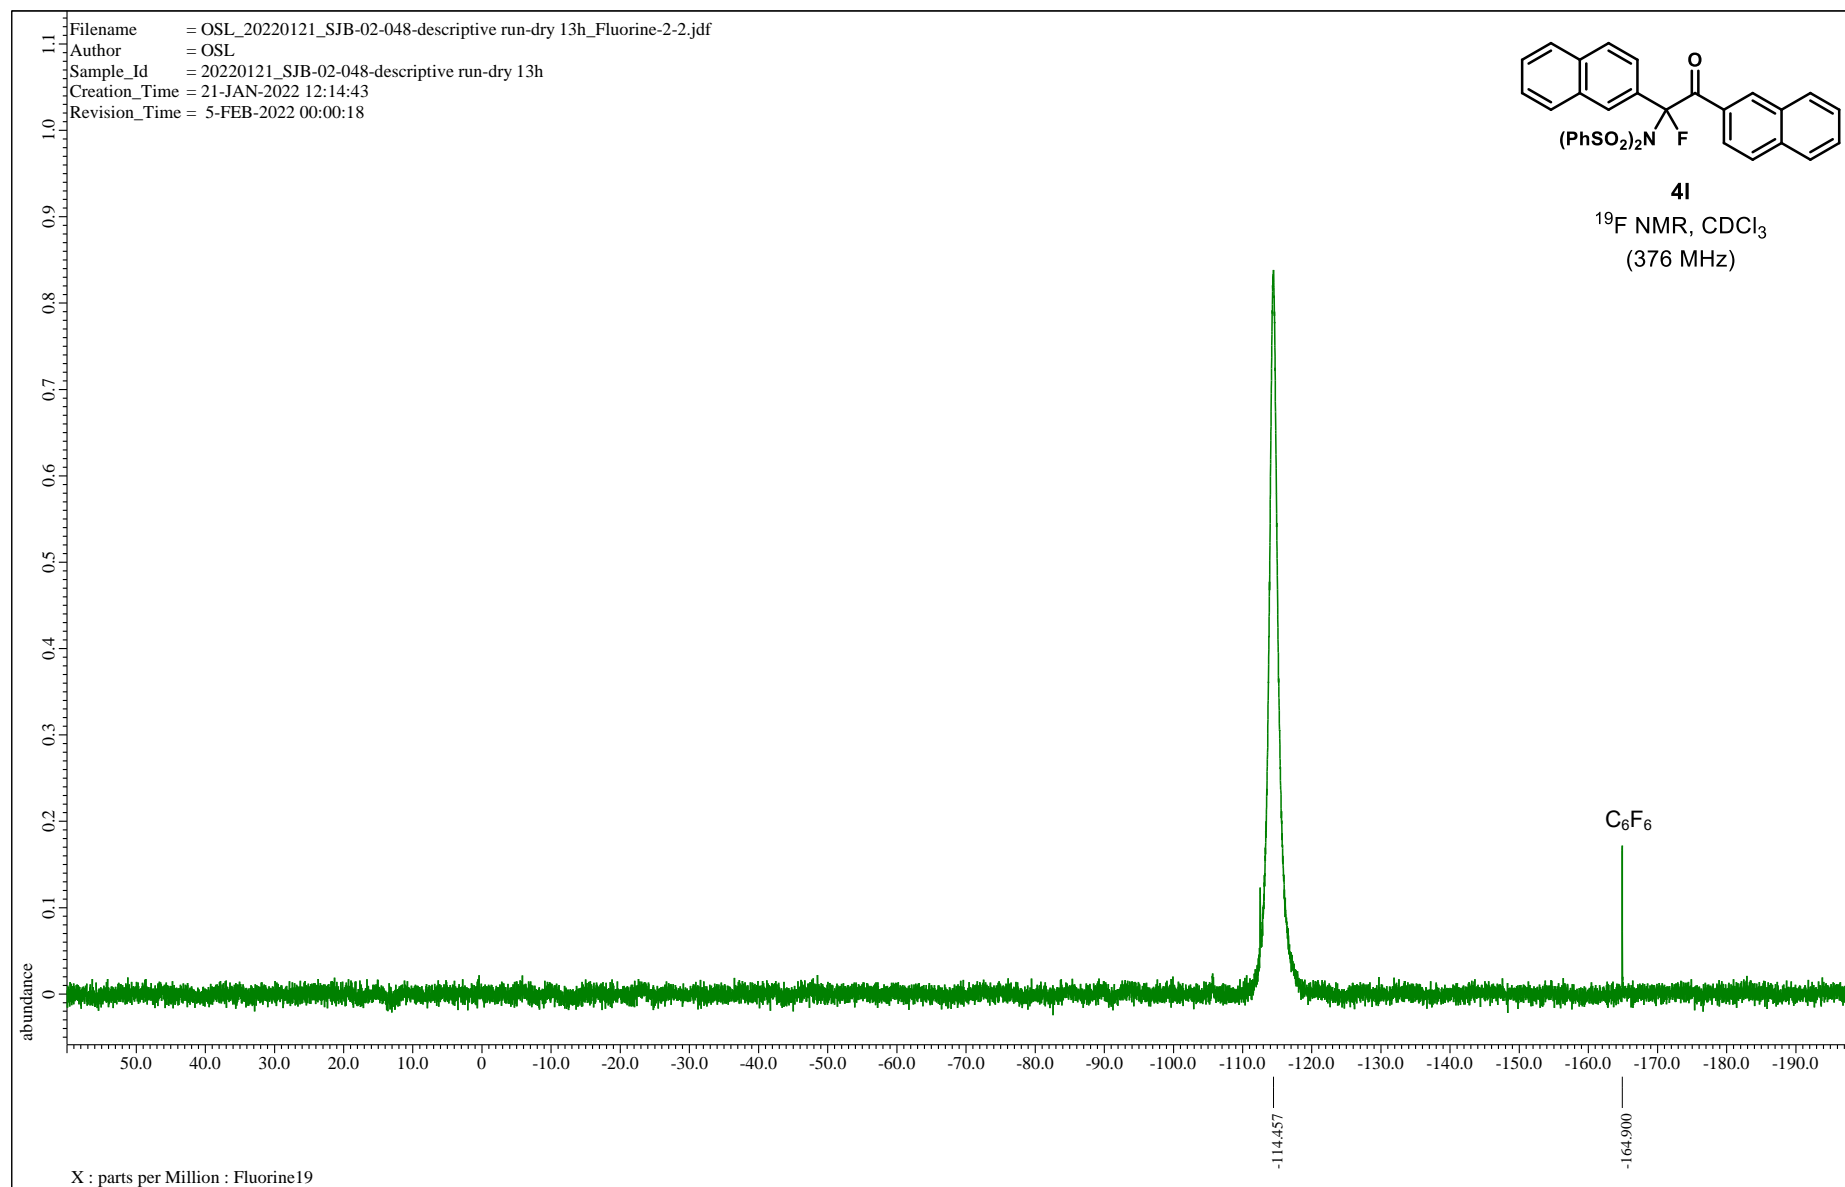



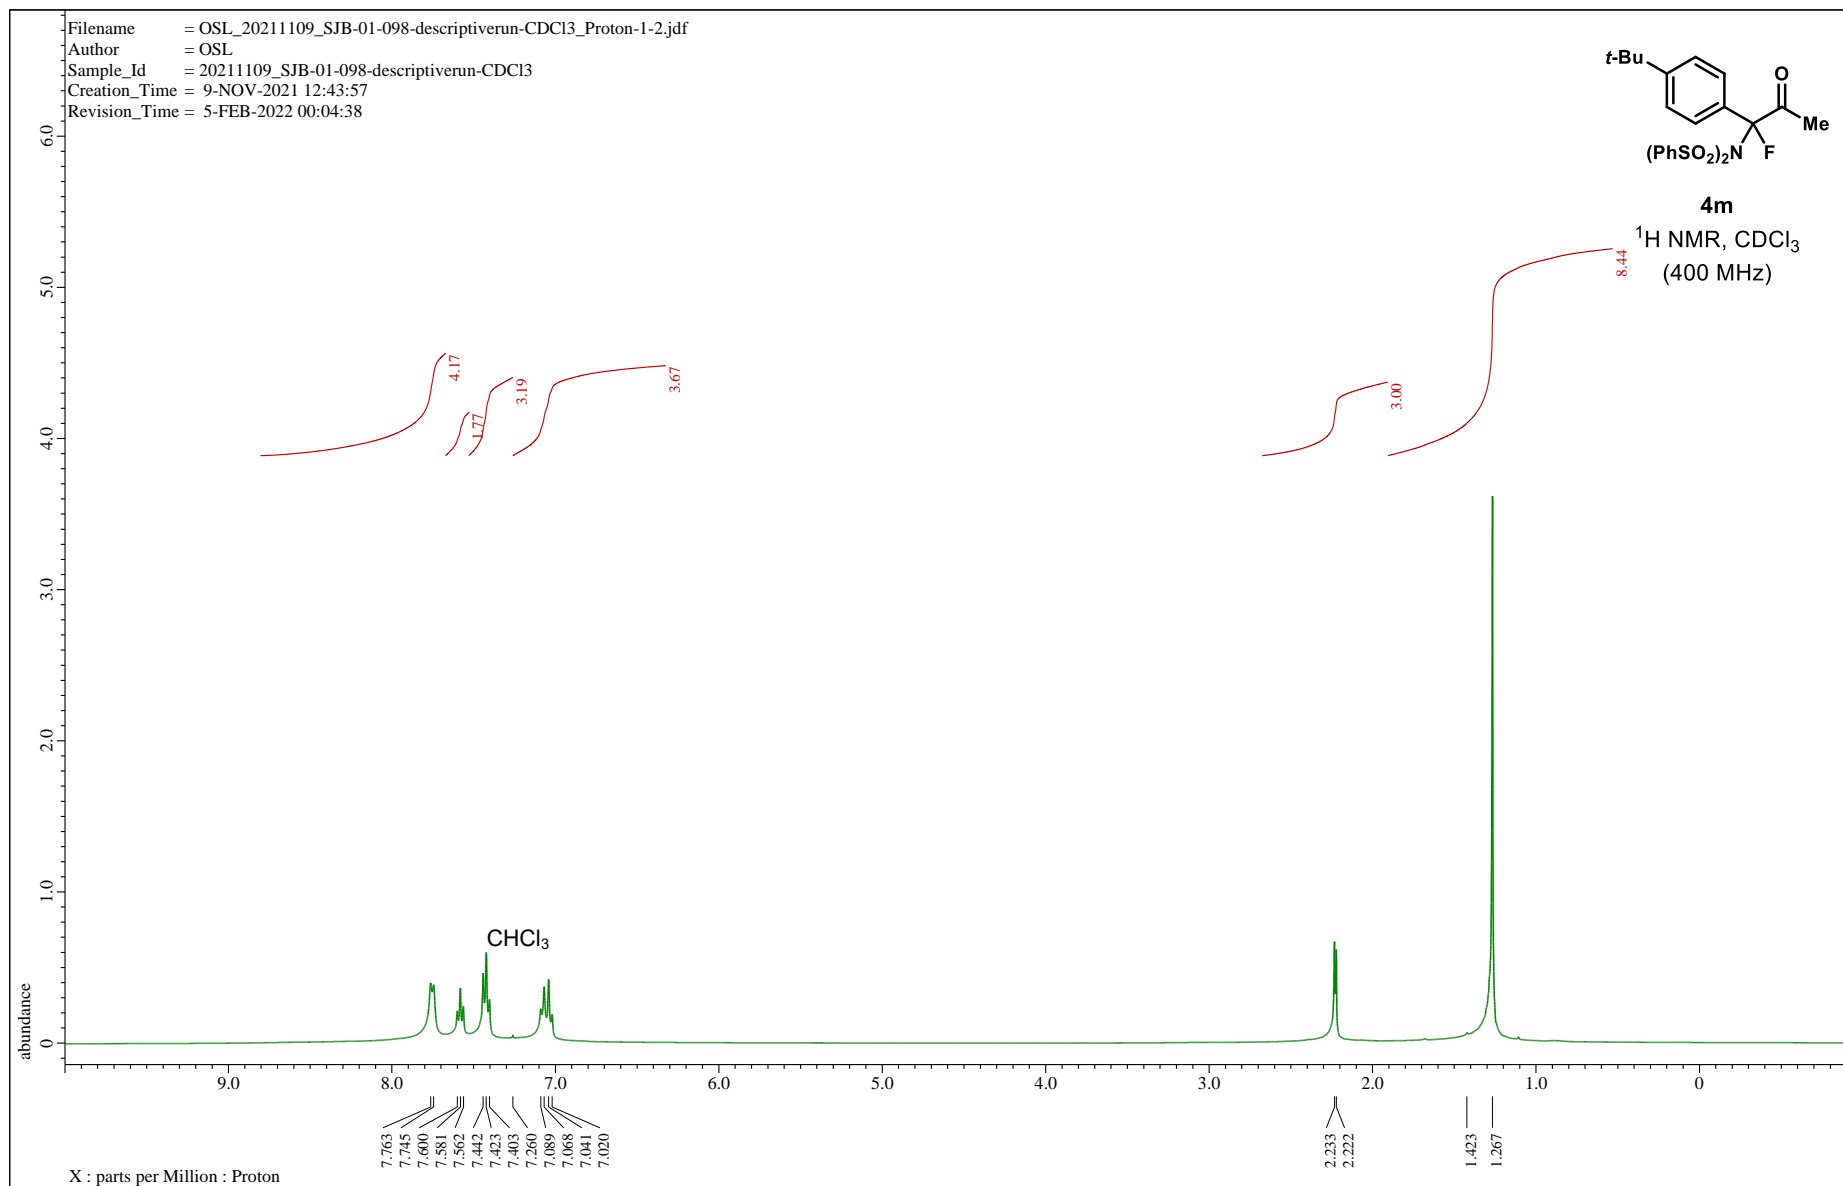

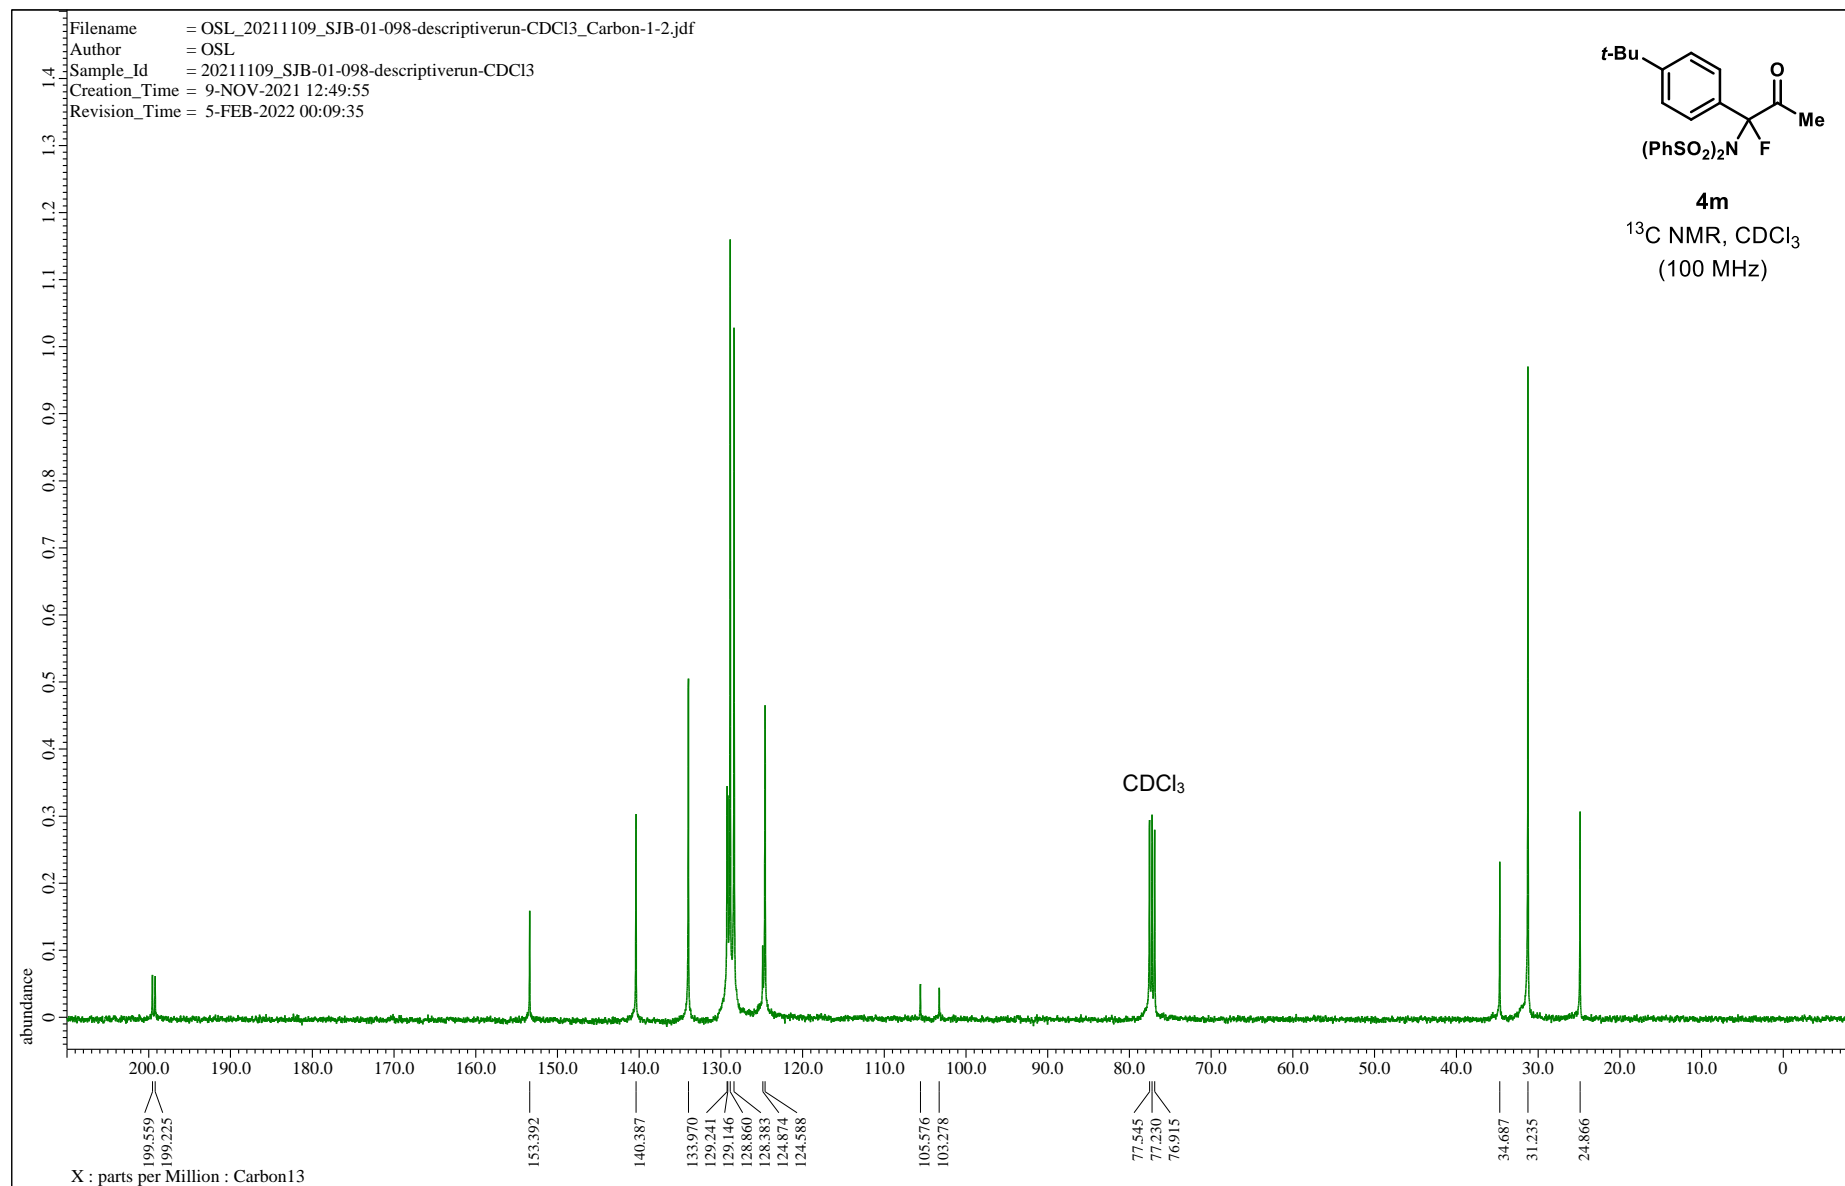

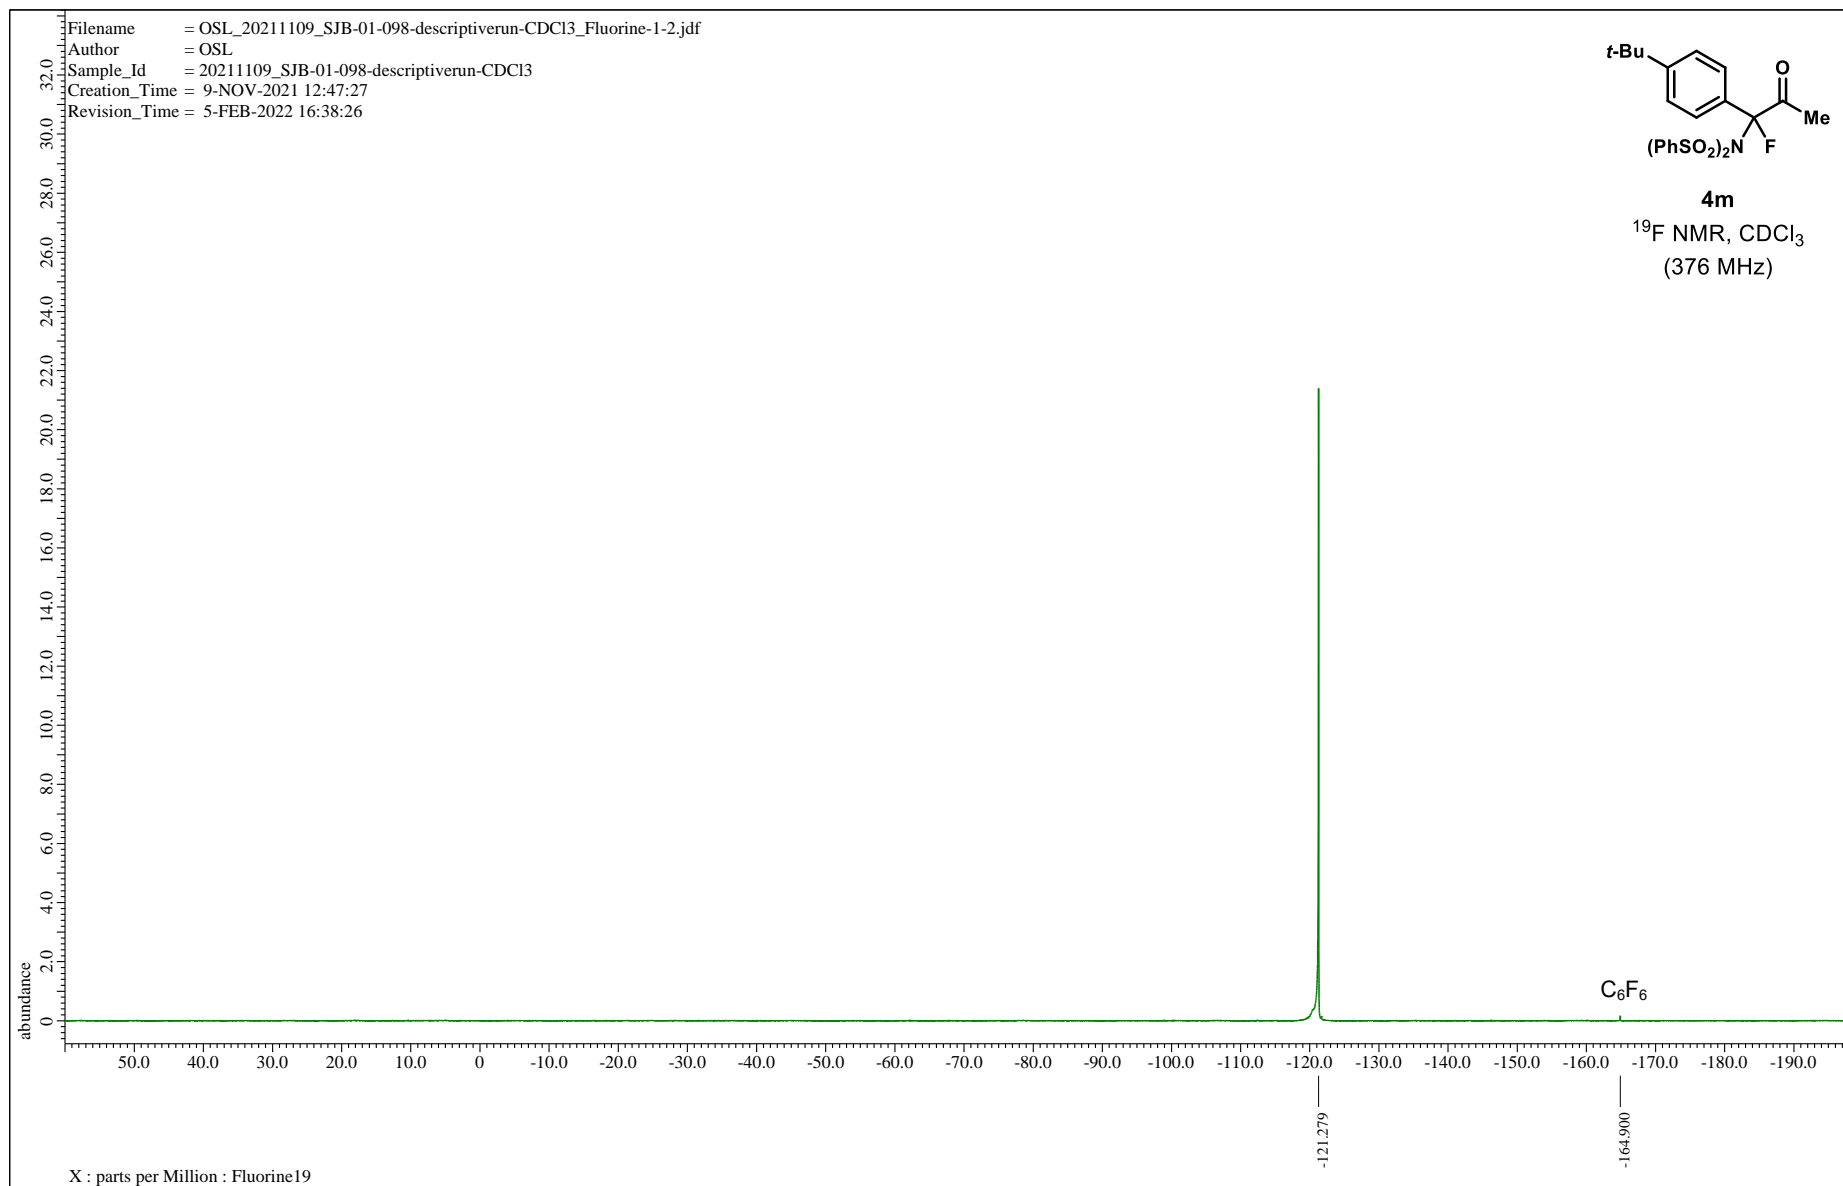

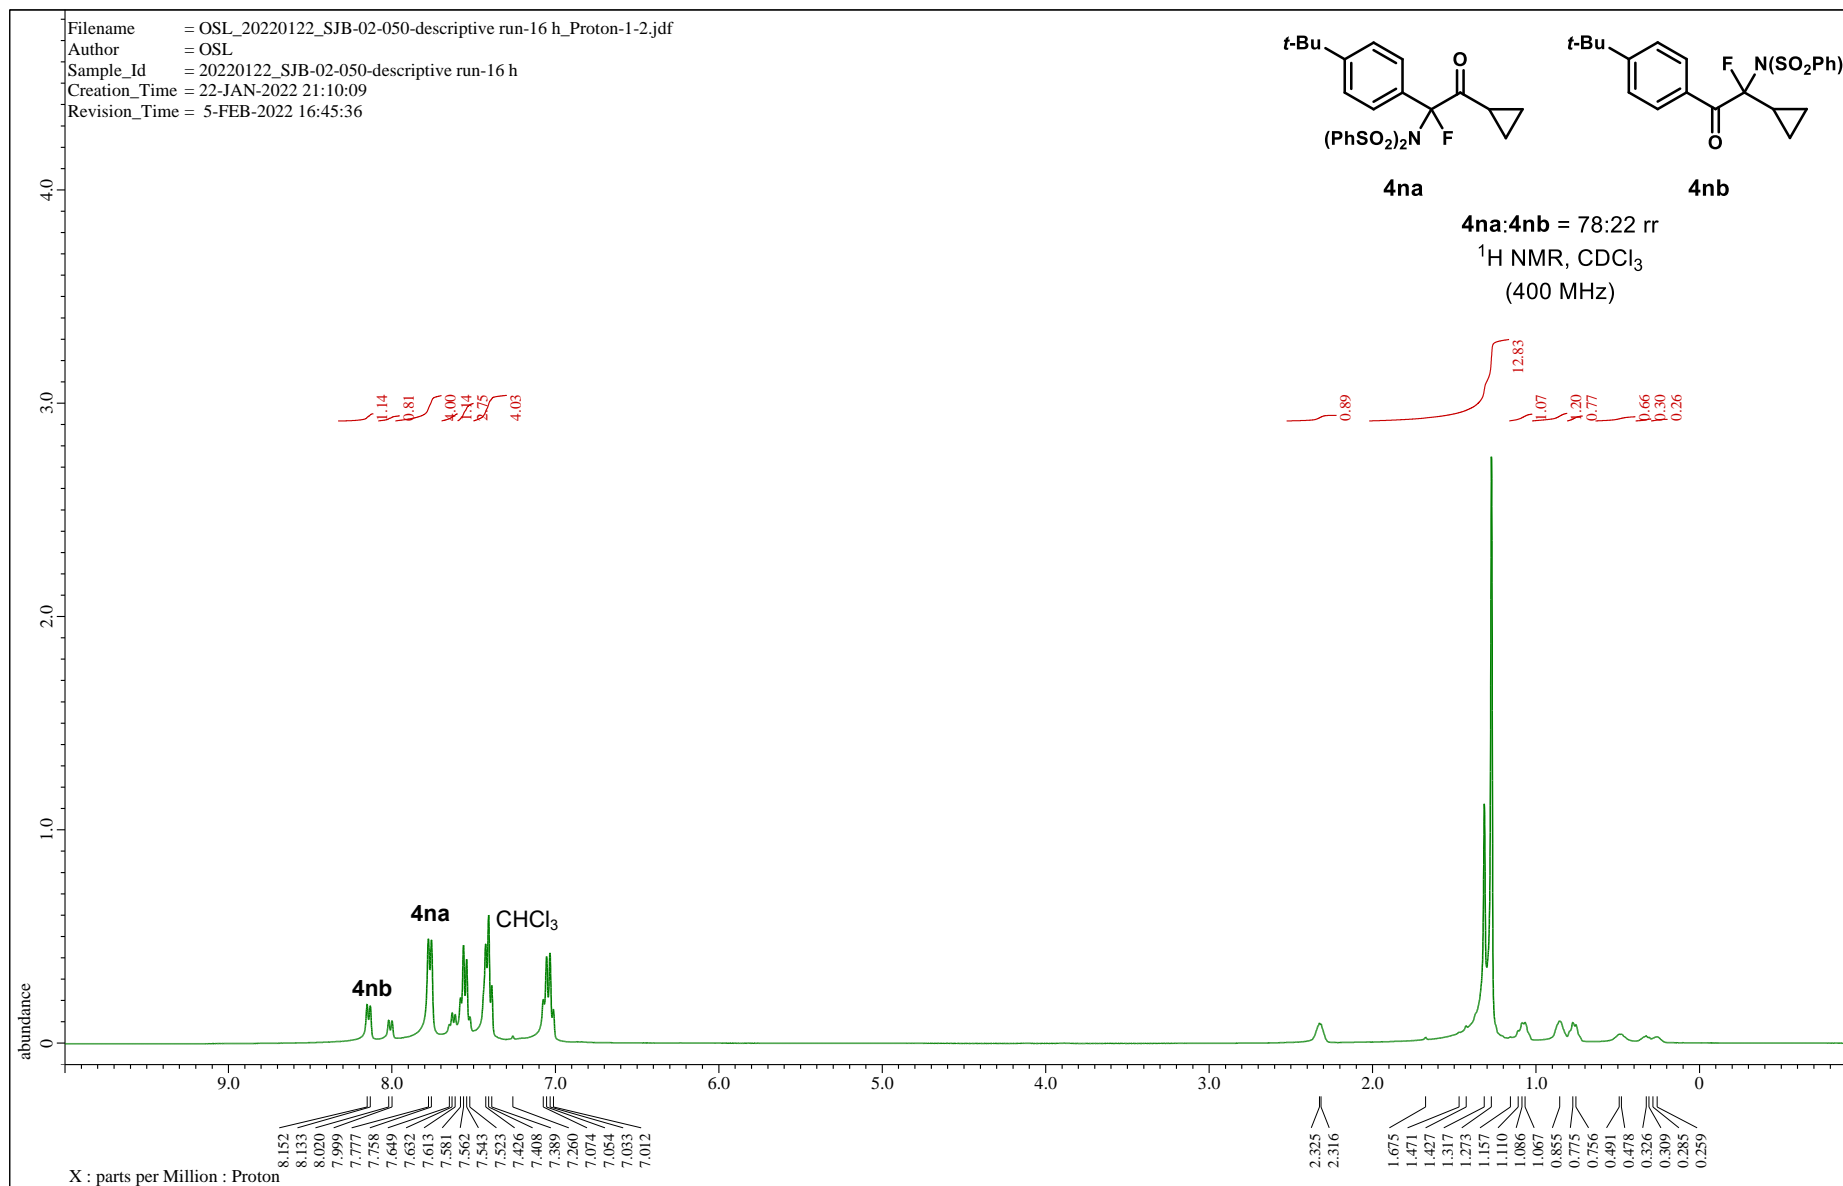

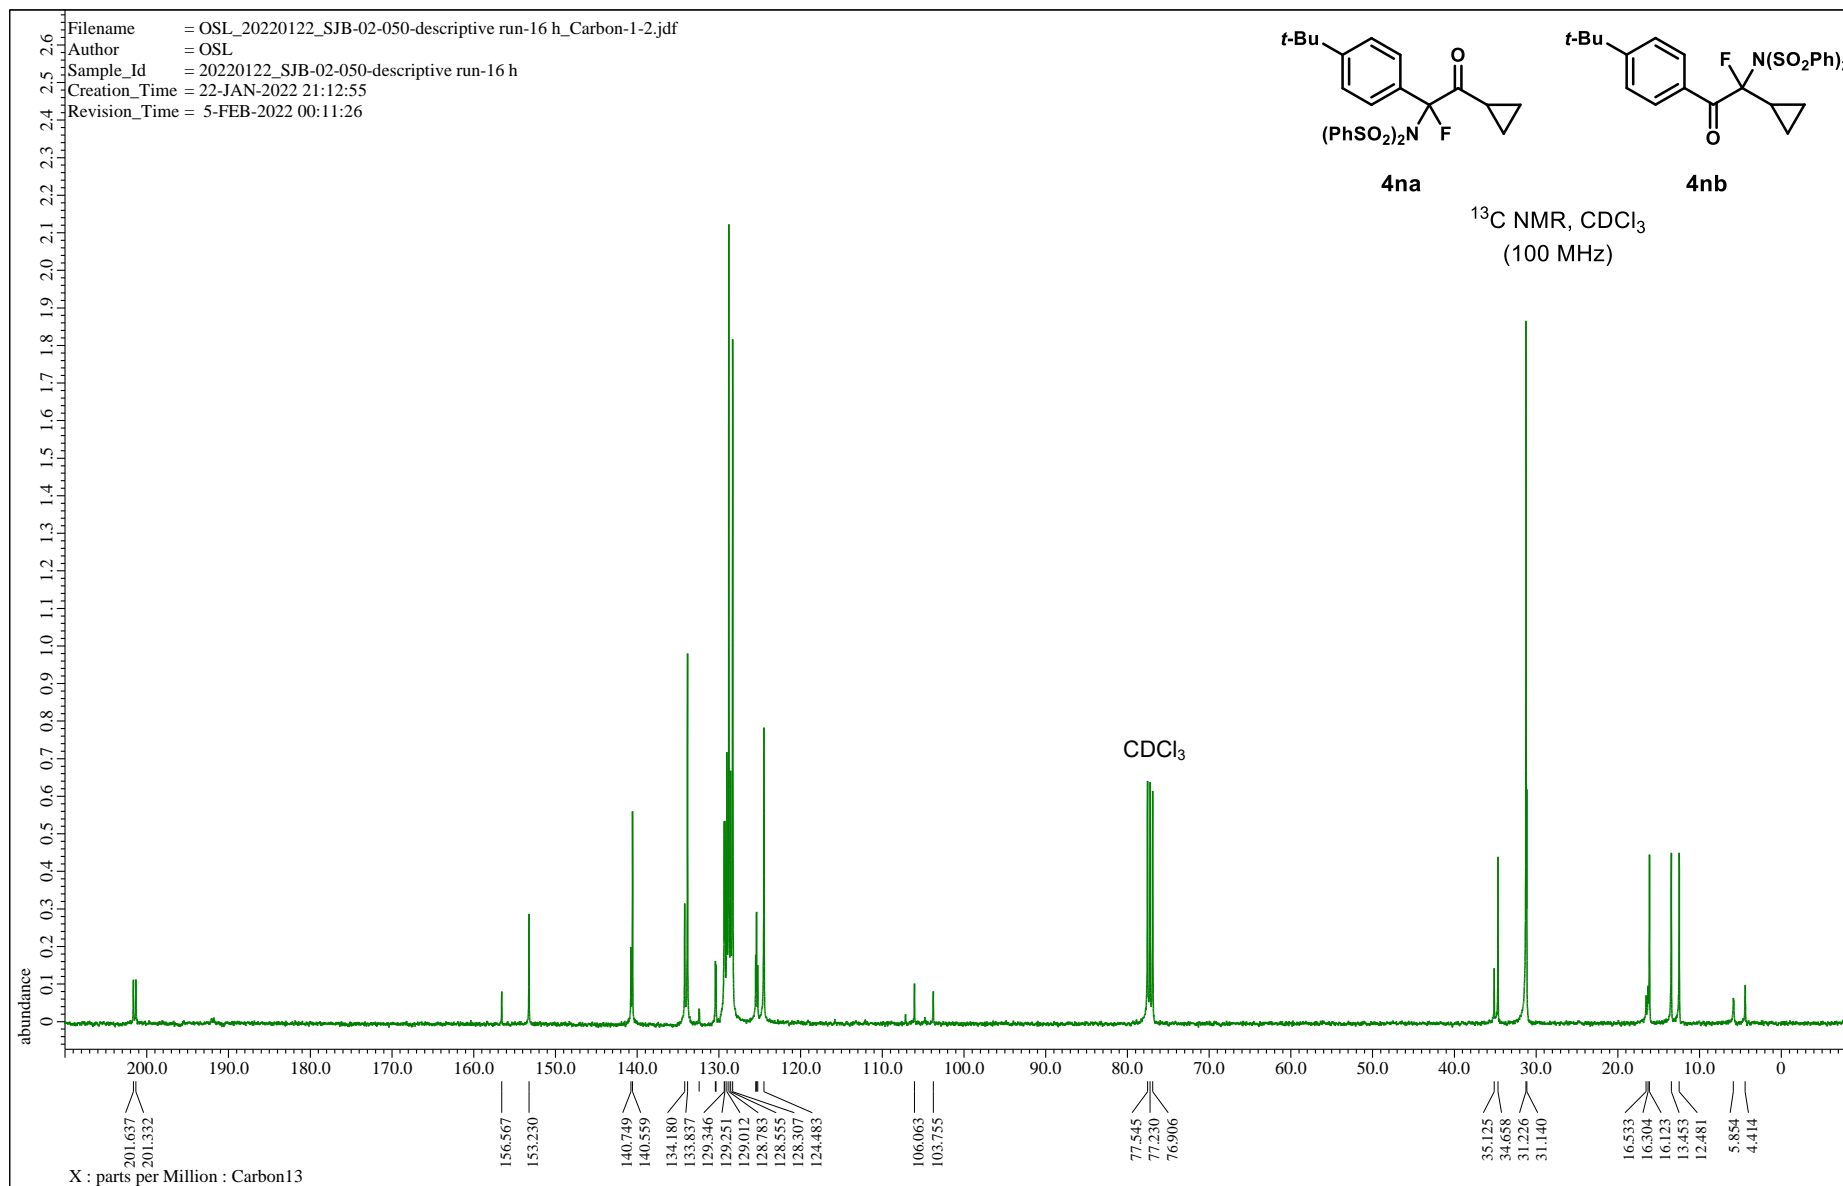

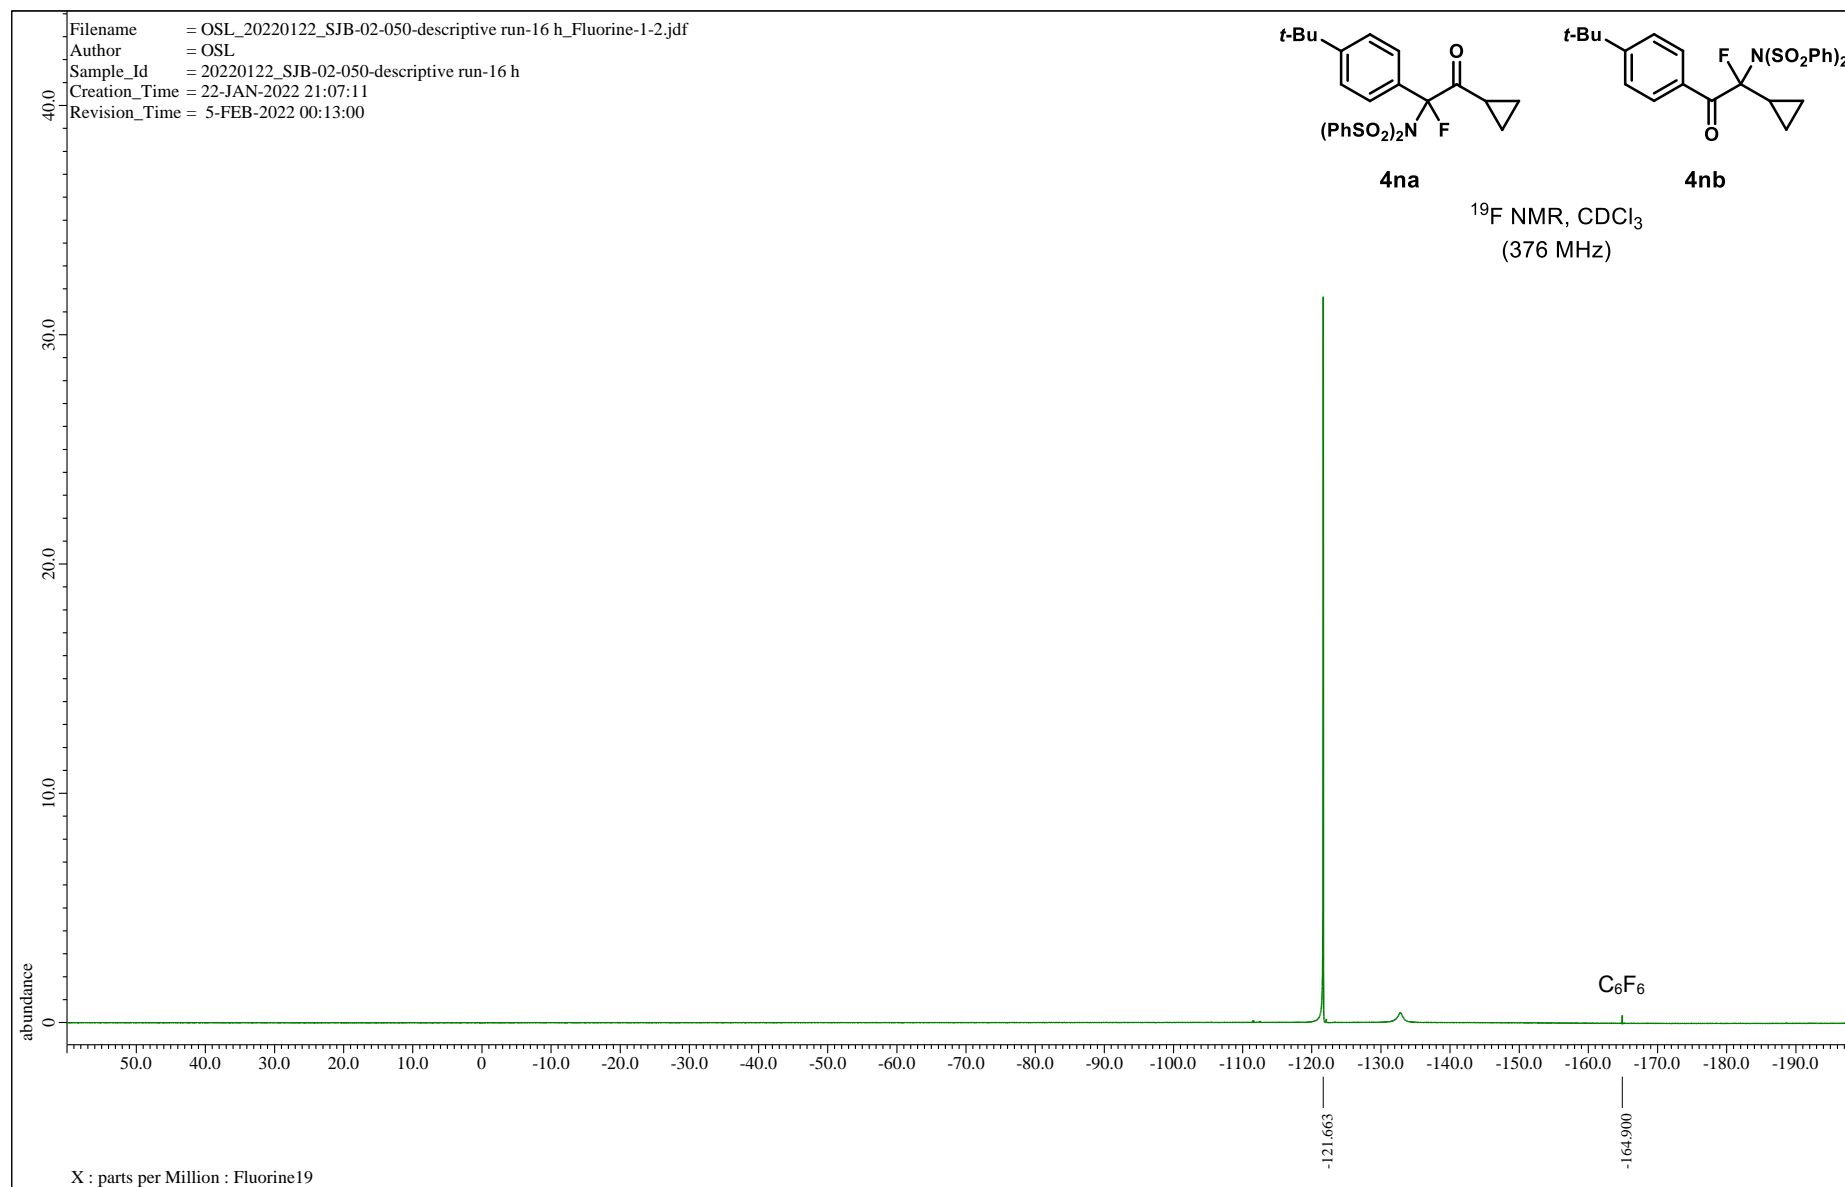

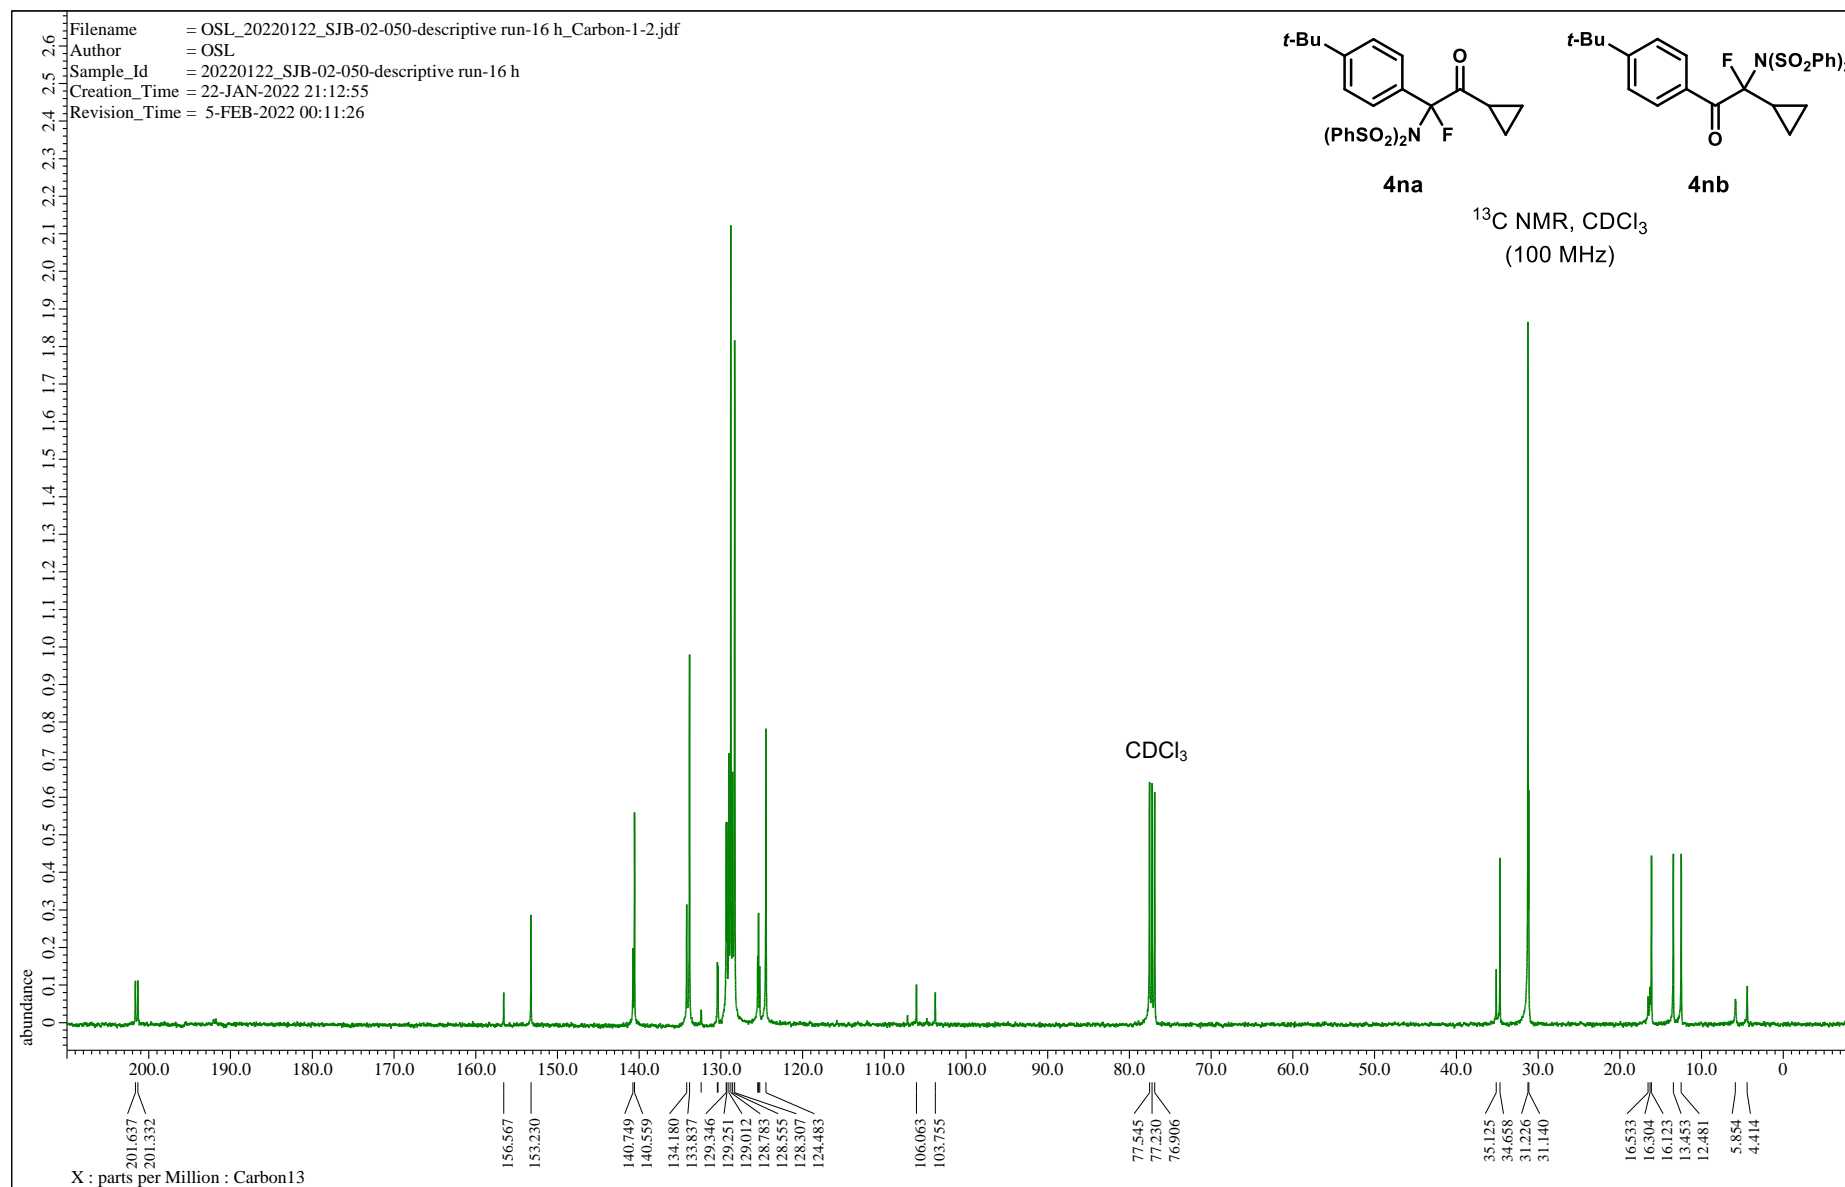

Supplement: d2ob00498d1.pdf [file d2ob00498d1.pdf]
